# Supplementary material
Source: publisher figshare collection journal article supplement (https://acs.figshare.com/ndownloader/files/4233187)
Supplement: Supplementary file 1 [file 4233187]

data_global
# 1. SUBMISSION DETAILS

_publ_contact_autor
;       Jun Okuda
        Institute of Inorganic Chemistry
        RWTH Aachen University
        Landoltweg 1
        D-52056 Aachen
        Germany
;
_publ_contact_author_phone        '+49 241 80 94645'
_publ_contact_author_fax          '+49 241 80 92644'
_publ_contact_author_email        'jun.okuda@ac.rwth-aachen.de'
_publ_requested_journal           'J. Am. Chem Soc.'

_publ_requested_coeditor_name     ?
#==============================================================================

# 3. TITLE AND AUTHOR LIST

_publ_section_title
;
;
_publ_section_abstract
;
;
loop_
_publ_author_name
_publ_author_address

'Venugopal, Ajay'
;       
Institut fur Anorganische Chemie
RWTH Aachen
Landoltweg 1
D-52056 Aachen
Germany

;
'Fegler, Waldemar'
;       
Institut fur Anorganische Chemie
RWTH Aachen
Landoltweg 1
D-52056 Aachen
Germany
;
'Spaniol, Thomas P.'
;       
Institut fur Anorganische Chemie
RWTH Aachen
Landoltweg 1
D-52056 Aachen
Germany
;
'Maron, Laurent'
;   
Universite de Toulouse, INSA, UPS, LPCNO
135 Avenue de Rangueil
31077 Toulouse    
;
'Okuda, Jun'
;       
Institut fur Anorganische Chemie
RWTH Aachen
Landoltweg 1
D-52056 Aachen
Germany
;

_publ_contact_author_name     'Jun Okuda'  
_publ_contact_author_address 
;
Institut fur Anorganische Chemie
RWTH Aachen
Landoltweg 1
Aachen
D-52056
Germany
;

_publ_contact_letter
;
These five crystal structures are a part of a manuscript 
that is sent for publication in the Journal 
J. Am. Chem Soc.
The individual structures are separated from each other
by the sequence #===END at the beginning of a line. 
;


#==================================================
 
data_2a-Lu
 
_audit_creation_method            SHELXL-97
_chemical_name_systematic
;
 ?
;
_chemical_name_common             ?
_chemical_melting_point           ?
_chemical_formula_moiety          
 'C16 H40 Lu N4 Si, C24 B F20'
_chemical_formula_sum
 'C40 H40 B F20 Lu N4 Si'
_chemical_formula_weight          1170.63
 
loop_
 _atom_type_symbol
 _atom_type_description
 _atom_type_scat_dispersion_real
 _atom_type_scat_dispersion_imag
 _atom_type_scat_source
 'C'  'C'   0.0033   0.0016
 'International Tables Vol C Tables 4.2.6.8 and 6.1.1.4'
 'H'  'H'   0.0000   0.0000
 'International Tables Vol C Tables 4.2.6.8 and 6.1.1.4'
 'B'  'B'   0.0013   0.0007
 'International Tables Vol C Tables 4.2.6.8 and 6.1.1.4'
 'F'  'F'   0.0171   0.0103
 'International Tables Vol C Tables 4.2.6.8 and 6.1.1.4'
 'Lu'  'Lu'  -0.4720   5.8584
 'International Tables Vol C Tables 4.2.6.8 and 6.1.1.4'
 'N'  'N'   0.0061   0.0033
 'International Tables Vol C Tables 4.2.6.8 and 6.1.1.4'
 'Si'  'Si'   0.0817   0.0704
 'International Tables Vol C Tables 4.2.6.8 and 6.1.1.4'
 
_symmetry_cell_setting            triclinic
_symmetry_space_group_name_H-M    'P-1'
_symmetry_space_group_name_Hall    '-P1' 

loop_
 _symmetry_equiv_pos_as_xyz
 'x, y, z'
 '-x, -y, -z'
 
_cell_length_a                    11.855(4)
_cell_length_b                    13.200(4)
_cell_length_c                    16.018(5)
_cell_angle_alpha                 67.933(4)
_cell_angle_beta                  70.455(5)
_cell_angle_gamma                 81.338(5)
_cell_volume                      2188.2(12)
_cell_formula_units_Z             2
_cell_measurement_temperature     100(2)
_cell_measurement_reflns_used    4743
_cell_measurement_theta_min       1.6
_cell_measurement_theta_max       28.0 

_exptl_crystal_description        plate
_exptl_crystal_colour             colourless
_exptl_crystal_size_max           0.20
_exptl_crystal_size_mid           0.15
_exptl_crystal_size_min           0.10
_exptl_crystal_density_meas       ?
_exptl_crystal_density_diffrn     1.777
_exptl_crystal_density_method     'not measured'
_exptl_crystal_F_000              1156
_exptl_absorpt_coefficient_mu     2.405
_exptl_absorpt_correction_type    multi-scan
_exptl_absorpt_correction_T_min   0.6449
_exptl_absorpt_correction_T_max   0.7950
_exptl_absorpt_process_details    'Mulabs Platon'
 
_exptl_special_details
;
 ?
;
 
_diffrn_ambient_temperature       100(2)
_diffrn_radiation_wavelength      0.71073
_diffrn_radiation_type            MoK\a
_diffrn_radiation_source          'INCOATEC microsource' 
_diffrn_radiation_monochromator   'multilayer optics'
_diffrn_measurement_device_type   'APEX Area Detector' 
_diffrn_measurement_method        'omega scans'
_diffrn_detector_area_resol_mean  ?
_diffrn_standards_number          ?
_diffrn_standards_interval_count  ?
_diffrn_standards_interval_time   ?
_diffrn_standards_decay_%         ?
_diffrn_reflns_number             30941
_diffrn_reflns_av_R_equivalents   0.1040
_diffrn_reflns_av_sigmaI/netI     0.1202
_diffrn_reflns_limit_h_min        -16
_diffrn_reflns_limit_h_max        16
_diffrn_reflns_limit_k_min        -18
_diffrn_reflns_limit_k_max        18
_diffrn_reflns_limit_l_min        -21
_diffrn_reflns_limit_l_max        21
_diffrn_reflns_theta_min          1.44
_diffrn_reflns_theta_max          29.10
_reflns_number_total              11335
_reflns_number_gt                 8833
_reflns_threshold_expression      >2sigma(I)
 
_computing_data_collection        'Bruker SMART (2001)'
_computing_cell_refinement        'Bruker SMART (2001)'
_computing_data_reduction         'Bruker SAINT+ (1999)'
_computing_structure_solution     'SIR-92 (Altomare 1992)'
_computing_structure_refinement   'SHELXL-97 (Sheldrick, 1997)'
_computing_molecular_graphics     'ORTEP-III (Farrugia, 1999)'

 
_refine_special_details
;
 Refinement of F^2^ against ALL reflections.  The weighted R-factor wR and
 goodness of fit S are based on F^2^, conventional R-factors R are based
 on F, with F set to zero for negative F^2^. The threshold expression of
 F^2^ > 2sigma(F^2^) is used only for calculating R-factors(gt) etc. and is
 not relevant to the choice of reflections for refinement.  R-factors based
 on F^2^ are statistically about twice as large as those based on F, and R-
 factors based on ALL data will be even larger.
;
 
_refine_ls_structure_factor_coef  Fsqd
_refine_ls_matrix_type            full
_refine_ls_weighting_scheme       calc
_refine_ls_weighting_details
 'calc w=1/[\s^2^(Fo^2^)+(0.0099P)^2^+0.0000P] where P=(Fo^2^+2Fc^2^)/3'
_atom_sites_solution_primary      direct
_atom_sites_solution_secondary    difmap
_atom_sites_solution_hydrogens    geom
_refine_ls_hydrogen_treatment     mixed
_refine_ls_extinction_method      none
_refine_ls_extinction_coef        ?
_refine_ls_number_reflns          11335
_refine_ls_number_parameters      618
_refine_ls_number_restraints      0
_refine_ls_R_factor_all           0.0600
_refine_ls_R_factor_gt            0.0480
_refine_ls_wR_factor_ref          0.0940
_refine_ls_wR_factor_gt           0.0909
_refine_ls_goodness_of_fit_ref    0.908
_refine_ls_restrained_S_all       0.908
_refine_ls_shift/su_max           0.002
_refine_ls_shift/su_mean          0.000
 
loop_
 _atom_site_label
 _atom_site_type_symbol
 _atom_site_fract_x
 _atom_site_fract_y
 _atom_site_fract_z
 _atom_site_U_iso_or_equiv
 _atom_site_adp_type
 _atom_site_occupancy
 _atom_site_symmetry_multiplicity
 _atom_site_calc_flag
 _atom_site_refinement_flags
 _atom_site_disorder_assembly
 _atom_site_disorder_group
Si1 Si 0.18697(13) 1.13447(11) 0.56557(9) 0.0234(3) Uani 1 1 d . . .
N1 N 0.1285(3) 0.8543(3) 0.8732(3) 0.0227(9) Uani 1 1 d . . .
N2 N 0.4211(3) 0.8864(3) 0.7651(3) 0.0254(10) Uani 1 1 d . . .
N3 N 0.2682(4) 0.7458(3) 0.6354(3) 0.0233(9) Uani 1 1 d . . .
N4 N 0.3005(3) 0.6857(3) 0.8215(3) 0.0210(9) Uani 1 1 d . . .
Lu1 Lu 0.253013(18) 0.868307(17) 0.718456(14) 0.01799(6) Uani 1 1 d . . .
F1 F 0.9120(2) 0.2695(2) 0.81408(17) 0.0235(6) Uani 1 1 d . . .
F2 F 1.0310(2) 0.4026(2) 0.84330(18) 0.0303(7) Uani 1 1 d . . .
F3 F 0.9493(3) 0.6102(2) 0.82814(19) 0.0369(8) Uani 1 1 d . . .
F4 F 0.7475(3) 0.6860(2) 0.77608(18) 0.0295(7) Uani 1 1 d . . .
F5 F 0.6280(2) 0.5555(2) 0.74417(17) 0.0204(6) Uani 1 1 d . . .
F6 F 0.6875(2) 0.1863(2) 0.93413(16) 0.0250(6) Uani 1 1 d . . .
F7 F 0.7110(3) -0.0307(2) 0.99242(18) 0.0342(7) Uani 1 1 d . . .
F8 F 0.7492(3) -0.1381(2) 0.86806(19) 0.0320(7) Uani 1 1 d . . .
F9 F 0.7709(2) -0.0198(2) 0.68341(18) 0.0277(7) Uani 1 1 d . . .
F10 F 0.7437(2) 0.1932(2) 0.62455(16) 0.0222(6) Uani 1 1 d . . .
F11 F 0.9107(2) 0.3368(2) 0.61142(16) 0.0208(6) Uani 1 1 d . . .
F12 F 0.9741(2) 0.4469(2) 0.42583(17) 0.0269(7) Uani 1 1 d . . .
F13 F 0.8111(3) 0.5776(2) 0.34443(17) 0.0285(7) Uani 1 1 d . . .
F14 F 0.5845(2) 0.6007(2) 0.45539(17) 0.0251(6) Uani 1 1 d . . .
F15 F 0.5178(2) 0.4909(2) 0.63898(16) 0.0197(6) Uani 1 1 d . . .
F16 F 0.5529(2) 0.3978(2) 0.92848(16) 0.0231(6) Uani 1 1 d . . .
F17 F 0.3244(2) 0.3738(2) 1.02274(17) 0.0287(7) Uani 1 1 d . . .
F18 F 0.1767(2) 0.2878(2) 0.97013(18) 0.0331(7) Uani 1 1 d . . .
F19 F 0.2676(2) 0.2266(2) 0.81479(19) 0.0305(7) Uani 1 1 d . . .
F20 F 0.4982(2) 0.2564(2) 0.71276(17) 0.0220(6) Uani 1 1 d . . .
B1 B 0.6828(5) 0.3356(4) 0.7507(3) 0.0142(10) Uani 1 1 d . . .
C1 C 0.0559(5) 0.8605(5) 0.8098(3) 0.0270(12) Uani 1 1 d . . .
H1A H 0.018(4) 0.937(4) 0.800(3) 0.032 Uiso 1 1 d . . .
H1B H -0.003(4) 0.807(4) 0.835(3) 0.032 Uiso 1 1 d . . .
C2 C 0.0886(5) 0.9321(5) 0.9229(3) 0.0371(14) Uani 1 1 d . . .
H2A H 0.0827 1.0057 0.8775 0.044 Uiso 1 1 calc R . .
H2B H 0.1464 0.9313 0.9549 0.044 Uiso 1 1 calc R . .
H2C H 0.0100 0.9116 0.9698 0.044 Uiso 1 1 calc R . .
C3 C 0.4214(5) 0.9928(4) 0.7735(4) 0.0397(14) Uani 1 1 d . . .
H3A H 0.4238 1.0508 0.7129 0.048 Uiso 1 1 calc R . .
H3B H 0.4920 0.9966 0.7910 0.048 Uiso 1 1 calc R . .
H3C H 0.3488 1.0023 0.8224 0.048 Uiso 1 1 calc R . .
C4 C 0.5281(4) 0.8711(5) 0.6909(4) 0.0343(13) Uani 1 1 d . . .
H4A H 0.5241 0.8014 0.6836 0.041 Uiso 1 1 calc R . .
H4B H 0.5998 0.8705 0.7086 0.041 Uiso 1 1 calc R . .
H4C H 0.5318 0.9311 0.6310 0.041 Uiso 1 1 calc R . .
C5 C 0.1645(5) 0.7758(4) 0.5976(3) 0.0294(12) Uani 1 1 d . . .
H5A H 0.0900 0.7691 0.6498 0.035 Uiso 1 1 calc R . .
H5B H 0.1634 0.7268 0.5647 0.035 Uiso 1 1 calc R . .
H5C H 0.1715 0.8515 0.5532 0.035 Uiso 1 1 calc R . .
C6 C 0.3796(4) 0.7537(4) 0.5564(3) 0.0298(12) Uani 1 1 d . . .
H6A H 0.3883 0.8292 0.5118 0.036 Uiso 1 1 calc R . .
H6B H 0.3762 0.7049 0.5239 0.036 Uiso 1 1 calc R . .
H6C H 0.4482 0.7322 0.5811 0.036 Uiso 1 1 calc R . .
C7 C 0.1330(4) 0.7441(4) 0.9417(3) 0.0286(12) Uani 1 1 d . . .
H7A H 0.0508 0.7239 0.9841 0.034 Uiso 1 1 calc R . .
H7B H 0.1817 0.7447 0.9811 0.034 Uiso 1 1 calc R . .
C8 C 0.1847(5) 0.6578(4) 0.8973(3) 0.0300(13) Uani 1 1 d . . .
H8A H 0.1959 0.5886 0.9474 0.036 Uiso 1 1 calc R . .
H8B H 0.1261 0.6448 0.8709 0.036 Uiso 1 1 calc R . .
C9 C 0.4166(4) 0.7989(4) 0.8575(3) 0.0301(12) Uani 1 1 d . . .
H9A H 0.3505 0.8165 0.9078 0.036 Uiso 1 1 calc R . .
H9B H 0.4924 0.7975 0.8712 0.036 Uiso 1 1 calc R . .
C10 C 0.3980(4) 0.6867(4) 0.8599(3) 0.0282(12) Uani 1 1 d . . .
H10A H 0.4735 0.6604 0.8228 0.034 Uiso 1 1 calc R . .
H10B H 0.3791 0.6353 0.9260 0.034 Uiso 1 1 calc R . .
C11 C 0.2549(5) 0.6320(4) 0.7040(3) 0.0300(12) Uani 1 1 d . . .
H11A H 0.2793 0.5802 0.6692 0.036 Uiso 1 1 calc R . .
H11B H 0.1698 0.6199 0.7422 0.036 Uiso 1 1 calc R . .
C12 C 0.3300(5) 0.6100(4) 0.7683(3) 0.0305(12) Uani 1 1 d . . .
H12A H 0.3181 0.5340 0.8136 0.037 Uiso 1 1 calc R . .
H12B H 0.4155 0.6167 0.7302 0.037 Uiso 1 1 calc R . .
C13 C 0.3031(5) 1.0218(4) 0.5793(3) 0.0294(12) Uani 1 1 d . . .
H13A H 0.3765 1.0524 0.5758 0.035 Uiso 1 1 calc R . .
H13B H 0.3230 0.9969 0.5249 0.035 Uiso 1 1 calc R . .
C14 C 0.1449(5) 1.1769(4) 0.6707(4) 0.0398(14) Uani 1 1 d . . .
H14A H 0.1055 1.1166 0.7273 0.048 Uiso 1 1 calc R . .
H14B H 0.0900 1.2407 0.6621 0.048 Uiso 1 1 calc R . .
H14C H 0.2171 1.1956 0.6780 0.048 Uiso 1 1 calc R . .
C15 C 0.2359(5) 1.2586(4) 0.4586(3) 0.0330(13) Uani 1 1 d . . .
H15A H 0.1735 1.3162 0.4604 0.040 Uiso 1 1 calc R . .
H15B H 0.2500 1.2407 0.4018 0.040 Uiso 1 1 calc R . .
H15C H 0.3101 1.2842 0.4573 0.040 Uiso 1 1 calc R . .
C16 C 0.0526(5) 1.0881(4) 0.5568(4) 0.0363(13) Uani 1 1 d . . .
H16A H 0.0227 1.0224 0.6116 0.044 Uiso 1 1 calc R . .
H16B H 0.0738 1.0712 0.4987 0.044 Uiso 1 1 calc R . .
H16C H -0.0097 1.1461 0.5555 0.044 Uiso 1 1 calc R . .
C17 C 0.7623(4) 0.4047(4) 0.7783(3) 0.0163(10) Uani 1 1 d . . .
C18 C 0.8667(4) 0.3709(4) 0.8035(3) 0.0193(10) Uani 1 1 d . . .
C19 C 0.9292(4) 0.4400(4) 0.8199(3) 0.0218(11) Uani 1 1 d . . .
C20 C 0.8893(4) 0.5444(4) 0.8109(3) 0.0243(11) Uani 1 1 d . . .
C21 C 0.7869(4) 0.5829(4) 0.7855(3) 0.0211(10) Uani 1 1 d . . .
C22 C 0.7282(4) 0.5132(4) 0.7692(3) 0.0171(10) Uani 1 1 d . . .
C23 C 0.7178(4) 0.2040(4) 0.7757(3) 0.0163(10) Uani 1 1 d . . .
C24 C 0.7111(4) 0.1382(4) 0.8683(3) 0.0192(10) Uani 1 1 d . . .
C25 C 0.7214(4) 0.0259(4) 0.9004(3) 0.0241(11) Uani 1 1 d . . .
C26 C 0.7416(4) -0.0289(4) 0.8387(3) 0.0225(11) Uani 1 1 d . . .
C27 C 0.7522(4) 0.0316(4) 0.7452(3) 0.0204(10) Uani 1 1 d . . .
C28 C 0.7386(4) 0.1436(4) 0.7170(3) 0.0180(10) Uani 1 1 d . . .
C29 C 0.7103(4) 0.4035(3) 0.6352(3) 0.0156(9) Uani 1 1 d . . .
C30 C 0.8259(4) 0.4010(4) 0.5752(3) 0.0169(10) Uani 1 1 d . . .
C31 C 0.8608(4) 0.4568(4) 0.4790(3) 0.0197(10) Uani 1 1 d . . .
C32 C 0.7796(4) 0.5233(4) 0.4378(3) 0.0206(11) Uani 1 1 d . . .
C33 C 0.6649(4) 0.5328(4) 0.4932(3) 0.0186(10) Uani 1 1 d . . .
C34 C 0.6323(4) 0.4738(4) 0.5901(3) 0.0163(10) Uani 1 1 d . . .
C35 C 0.5393(4) 0.3319(3) 0.8123(3) 0.0141(9) Uani 1 1 d . . .
C36 C 0.4868(4) 0.3566(4) 0.8943(3) 0.0181(10) Uani 1 1 d . . .
C37 C 0.3681(4) 0.3439(4) 0.9463(3) 0.0201(10) Uani 1 1 d . . .
C38 C 0.2926(4) 0.3013(4) 0.9191(3) 0.0209(11) Uani 1 1 d . . .
C39 C 0.3385(4) 0.2722(4) 0.8406(3) 0.0211(11) Uani 1 1 d . . .
C40 C 0.4588(4) 0.2878(4) 0.7890(3) 0.0175(10) Uani 1 1 d . . .
 
loop_
 _atom_site_aniso_label
 _atom_site_aniso_U_11
 _atom_site_aniso_U_22
 _atom_site_aniso_U_33
 _atom_site_aniso_U_23
 _atom_site_aniso_U_13
 _atom_site_aniso_U_12
Si1 0.0247(8) 0.0224(7) 0.0249(7) -0.0095(6) -0.0082(6) -0.0005(6)
N1 0.017(2) 0.031(2) 0.021(2) -0.0109(19) -0.0068(18) -0.0009(18)
N2 0.019(2) 0.038(3) 0.024(2) -0.017(2) -0.0020(18) -0.0077(19)
N3 0.026(2) 0.024(2) 0.022(2) -0.0076(18) -0.0096(19) -0.0013(18)
N4 0.022(2) 0.025(2) 0.020(2) -0.0085(18) -0.0096(18) -0.0007(18)
Lu1 0.01777(11) 0.01974(11) 0.01658(11) -0.00699(8) -0.00424(8) -0.00145(8)
F1 0.0196(15) 0.0301(16) 0.0207(14) -0.0070(12) -0.0093(12) 0.0018(12)
F2 0.0162(15) 0.051(2) 0.0242(15) -0.0067(14) -0.0108(12) -0.0078(14)
F3 0.0385(19) 0.046(2) 0.0343(17) -0.0127(15) -0.0142(15) -0.0223(16)
F4 0.0417(19) 0.0234(16) 0.0272(15) -0.0095(13) -0.0121(14) -0.0064(14)
F5 0.0191(14) 0.0219(15) 0.0241(14) -0.0095(12) -0.0105(12) 0.0012(11)
F6 0.0328(17) 0.0292(16) 0.0138(13) -0.0064(12) -0.0097(12) 0.0000(13)
F7 0.051(2) 0.0271(17) 0.0197(15) 0.0036(13) -0.0165(15) -0.0033(15)
F8 0.0373(18) 0.0182(15) 0.0386(17) -0.0044(13) -0.0142(15) -0.0031(13)
F9 0.0302(17) 0.0245(16) 0.0323(16) -0.0148(13) -0.0074(13) -0.0034(13)
F10 0.0305(16) 0.0242(15) 0.0131(13) -0.0076(12) -0.0063(12) -0.0017(12)
F11 0.0164(14) 0.0262(15) 0.0184(13) -0.0068(12) -0.0058(11) 0.0021(11)
F12 0.0235(16) 0.0321(17) 0.0214(14) -0.0105(13) 0.0014(12) -0.0059(13)
F13 0.0453(19) 0.0251(16) 0.0119(13) -0.0001(12) -0.0082(13) -0.0102(14)
F14 0.0327(17) 0.0245(15) 0.0208(14) -0.0030(12) -0.0172(13) -0.0005(13)
F15 0.0174(14) 0.0239(15) 0.0184(13) -0.0064(12) -0.0080(11) 0.0009(11)
F16 0.0218(15) 0.0346(17) 0.0166(13) -0.0116(12) -0.0055(12) -0.0053(12)
F17 0.0258(16) 0.0392(18) 0.0173(14) -0.0115(13) 0.0005(12) -0.0016(13)
F18 0.0139(15) 0.046(2) 0.0266(16) -0.0002(14) -0.0036(13) -0.0044(13)
F19 0.0228(16) 0.0384(18) 0.0341(16) -0.0082(14) -0.0149(13) -0.0095(13)
F20 0.0253(15) 0.0247(15) 0.0216(14) -0.0093(12) -0.0116(12) -0.0029(12)
B1 0.016(3) 0.017(3) 0.012(2) -0.006(2) -0.005(2) -0.003(2)
C1 0.025(3) 0.036(3) 0.021(3) -0.007(2) -0.010(2) -0.006(2)
C2 0.037(3) 0.050(4) 0.027(3) -0.022(3) -0.005(3) 0.002(3)
C3 0.032(3) 0.042(4) 0.055(4) -0.027(3) -0.014(3) -0.002(3)
C4 0.019(3) 0.047(4) 0.041(3) -0.023(3) -0.003(2) -0.007(3)
C5 0.037(3) 0.028(3) 0.032(3) -0.012(2) -0.022(3) 0.002(2)
C6 0.031(3) 0.036(3) 0.027(3) -0.018(2) -0.010(2) 0.008(2)
C7 0.018(3) 0.046(3) 0.016(2) -0.007(2) 0.001(2) -0.009(2)
C8 0.033(3) 0.027(3) 0.024(3) 0.003(2) -0.010(2) -0.012(2)
C9 0.021(3) 0.047(4) 0.025(3) -0.014(3) -0.009(2) -0.002(2)
C10 0.028(3) 0.042(3) 0.021(3) -0.013(2) -0.017(2) 0.009(2)
C11 0.046(4) 0.021(3) 0.030(3) -0.009(2) -0.021(3) -0.002(2)
C12 0.045(3) 0.019(3) 0.033(3) -0.007(2) -0.022(3) 0.003(2)
C13 0.031(3) 0.026(3) 0.028(3) -0.007(2) -0.001(2) -0.014(2)
C14 0.055(4) 0.034(3) 0.033(3) -0.011(3) -0.019(3) 0.002(3)
C15 0.038(3) 0.027(3) 0.034(3) -0.009(2) -0.016(3) 0.005(2)
C16 0.033(3) 0.039(3) 0.040(3) -0.019(3) -0.013(3) 0.005(3)
C17 0.016(2) 0.024(3) 0.006(2) -0.0011(18) -0.0003(18) -0.0074(19)
C18 0.016(2) 0.028(3) 0.009(2) -0.003(2) 0.0000(19) -0.002(2)
C19 0.012(2) 0.040(3) 0.010(2) -0.004(2) -0.0005(19) -0.010(2)
C20 0.025(3) 0.036(3) 0.011(2) -0.006(2) -0.001(2) -0.017(2)
C21 0.025(3) 0.024(3) 0.014(2) -0.007(2) -0.002(2) -0.007(2)
C22 0.015(2) 0.025(3) 0.009(2) -0.0036(19) -0.0019(18) -0.006(2)
C23 0.013(2) 0.021(2) 0.018(2) -0.0063(19) -0.0089(19) -0.0007(19)
C24 0.017(2) 0.027(3) 0.016(2) -0.010(2) -0.004(2) 0.000(2)
C25 0.023(3) 0.028(3) 0.016(2) -0.001(2) -0.007(2) -0.001(2)
C26 0.019(3) 0.015(2) 0.033(3) -0.003(2) -0.012(2) -0.003(2)
C27 0.015(2) 0.026(3) 0.025(3) -0.015(2) -0.006(2) -0.001(2)
C28 0.013(2) 0.023(3) 0.018(2) -0.006(2) -0.0042(19) -0.0027(19)
C29 0.022(3) 0.013(2) 0.015(2) -0.0058(18) -0.009(2) -0.0022(19)
C30 0.017(2) 0.019(2) 0.019(2) -0.0058(19) -0.008(2) -0.0062(19)
C31 0.019(3) 0.023(3) 0.018(2) -0.011(2) 0.001(2) -0.008(2)
C32 0.034(3) 0.016(2) 0.014(2) -0.0039(19) -0.007(2) -0.012(2)
C33 0.028(3) 0.014(2) 0.017(2) -0.0041(19) -0.012(2) -0.001(2)
C34 0.019(2) 0.018(2) 0.016(2) -0.0116(19) -0.0048(19) -0.0015(19)
C35 0.014(2) 0.013(2) 0.013(2) -0.0010(18) -0.0059(18) -0.0007(18)
C36 0.018(2) 0.021(3) 0.014(2) -0.0014(19) -0.0061(19) -0.005(2)
C37 0.023(3) 0.018(2) 0.011(2) 0.0015(19) -0.002(2) 0.000(2)
C38 0.011(2) 0.023(3) 0.018(2) 0.005(2) -0.0041(19) -0.0030(19)
C39 0.021(3) 0.019(3) 0.022(3) 0.002(2) -0.013(2) -0.006(2)
C40 0.021(3) 0.015(2) 0.015(2) -0.0014(19) -0.008(2) -0.0002(19)
 
_geom_special_details
;
 All esds (except the esd in the dihedral angle between two l.s. planes)
 are estimated using the full covariance matrix.  The cell esds are taken
 into account individually in the estimation of esds in distances, angles
 and torsion angles; correlations between esds in cell parameters are only
 used when they are defined by crystal symmetry.  An approximate (isotropic)
 treatment of cell esds is used for estimating esds involving l.s. planes.
;
 
loop_
 _geom_bond_atom_site_label_1
 _geom_bond_atom_site_label_2
 _geom_bond_distance
 _geom_bond_site_symmetry_2
 _geom_bond_publ_flag
Si1 C16 1.855(5) . ?
Si1 C14 1.859(5) . ?
Si1 C15 1.863(5) . ?
Si1 C13 1.870(5) . ?
N1 C2 1.459(6) . ?
N1 C7 1.463(6) . ?
N1 C1 1.509(6) . ?
N1 Lu1 2.376(4) . ?
N2 C3 1.461(6) . ?
N2 C4 1.469(6) . ?
N2 C9 1.486(6) . ?
N2 Lu1 2.420(4) . ?
N3 C6 1.476(6) . ?
N3 C11 1.485(6) . ?
N3 C5 1.486(6) . ?
N3 Lu1 2.405(4) . ?
N4 C12 1.478(6) . ?
N4 C8 1.481(6) . ?
N4 C10 1.483(5) . ?
N4 Lu1 2.464(4) . ?
Lu1 C1 2.298(5) . ?
Lu1 C13 2.347(5) . ?
F1 C18 1.335(5) . ?
F2 C19 1.350(5) . ?
F3 C20 1.354(5) . ?
F4 C21 1.341(5) . ?
F5 C22 1.355(5) . ?
F6 C24 1.358(5) . ?
F7 C25 1.351(5) . ?
F8 C26 1.338(5) . ?
F9 C27 1.342(5) . ?
F10 C28 1.359(5) . ?
F11 C30 1.353(5) . ?
F12 C31 1.346(5) . ?
F13 C32 1.339(5) . ?
F14 C33 1.342(5) . ?
F15 C34 1.355(5) . ?
F16 C36 1.359(5) . ?
F17 C37 1.342(5) . ?
F18 C38 1.342(5) . ?
F19 C39 1.347(5) . ?
F20 C40 1.349(5) . ?
B1 C23 1.650(7) . ?
B1 C35 1.654(6) . ?
B1 C17 1.661(6) . ?
B1 C29 1.664(6) . ?
C1 H1A 1.02(5) . ?
C1 H1B 0.95(5) . ?
C2 H2A 0.9800 . ?
C2 H2B 0.9800 . ?
C2 H2C 0.9800 . ?
C3 H3A 0.9800 . ?
C3 H3B 0.9800 . ?
C3 H3C 0.9800 . ?
C4 H4A 0.9800 . ?
C4 H4B 0.9800 . ?
C4 H4C 0.9800 . ?
C5 H5A 0.9800 . ?
C5 H5B 0.9800 . ?
C5 H5C 0.9800 . ?
C6 H6A 0.9800 . ?
C6 H6B 0.9800 . ?
C6 H6C 0.9800 . ?
C7 C8 1.512(7) . ?
C7 H7A 0.9900 . ?
C7 H7B 0.9900 . ?
C8 H8A 0.9900 . ?
C8 H8B 0.9900 . ?
C9 C10 1.515(7) . ?
C9 H9A 0.9900 . ?
C9 H9B 0.9900 . ?
C10 H10A 0.9900 . ?
C10 H10B 0.9900 . ?
C11 C12 1.499(6) . ?
C11 H11A 0.9900 . ?
C11 H11B 0.9900 . ?
C12 H12A 0.9900 . ?
C12 H12B 0.9900 . ?
C13 H13A 0.9900 . ?
C13 H13B 0.9900 . ?
C14 H14A 0.9800 . ?
C14 H14B 0.9800 . ?
C14 H14C 0.9800 . ?
C15 H15A 0.9800 . ?
C15 H15B 0.9800 . ?
C15 H15C 0.9800 . ?
C16 H16A 0.9800 . ?
C16 H16B 0.9800 . ?
C16 H16C 0.9800 . ?
C17 C18 1.387(6) . ?
C17 C22 1.395(6) . ?
C18 C19 1.402(6) . ?
C19 C20 1.358(7) . ?
C20 C21 1.373(7) . ?
C21 C22 1.376(6) . ?
C23 C28 1.389(6) . ?
C23 C24 1.390(6) . ?
C24 C25 1.376(7) . ?
C25 C26 1.371(7) . ?
C26 C27 1.380(6) . ?
C27 C28 1.375(6) . ?
C29 C34 1.386(6) . ?
C29 C30 1.390(6) . ?
C30 C31 1.379(6) . ?
C31 C32 1.367(6) . ?
C32 C33 1.370(6) . ?
C33 C34 1.396(6) . ?
C35 C36 1.389(6) . ?
C35 C40 1.401(6) . ?
C36 C37 1.373(6) . ?
C37 C38 1.380(6) . ?
C38 C39 1.365(7) . ?
C39 C40 1.389(6) . ?
 
loop_
 _geom_angle_atom_site_label_1
 _geom_angle_atom_site_label_2
 _geom_angle_atom_site_label_3
 _geom_angle
 _geom_angle_site_symmetry_1
 _geom_angle_site_symmetry_3
 _geom_angle_publ_flag
C16 Si1 C14 109.7(3) . . ?
C16 Si1 C15 105.8(2) . . ?
C14 Si1 C15 107.5(2) . . ?
C16 Si1 C13 110.9(2) . . ?
C14 Si1 C13 108.0(2) . . ?
C15 Si1 C13 114.8(2) . . ?
C2 N1 C7 109.2(4) . . ?
C2 N1 C1 113.9(4) . . ?
C7 N1 C1 112.3(4) . . ?
C2 N1 Lu1 133.4(3) . . ?
C7 N1 Lu1 112.0(3) . . ?
C1 N1 Lu1 68.4(2) . . ?
C3 N2 C4 110.5(4) . . ?
C3 N2 C9 109.1(4) . . ?
C4 N2 C9 110.4(4) . . ?
C3 N2 Lu1 112.7(3) . . ?
C4 N2 Lu1 105.3(3) . . ?
C9 N2 Lu1 108.8(3) . . ?
C6 N3 C11 109.9(4) . . ?
C6 N3 C5 109.0(4) . . ?
C11 N3 C5 108.9(4) . . ?
C6 N3 Lu1 114.7(3) . . ?
C11 N3 Lu1 108.9(3) . . ?
C5 N3 Lu1 105.2(3) . . ?
C12 N4 C8 110.4(4) . . ?
C12 N4 C10 111.4(4) . . ?
C8 N4 C10 111.4(4) . . ?
C12 N4 Lu1 108.8(3) . . ?
C8 N4 Lu1 101.6(3) . . ?
C10 N4 Lu1 112.8(3) . . ?
C1 Lu1 C13 115.77(19) . . ?
C1 Lu1 N1 37.63(14) . . ?
C13 Lu1 N1 130.30(16) . . ?
C1 Lu1 N3 104.08(17) . . ?
C13 Lu1 N3 93.57(16) . . ?
N1 Lu1 N3 127.98(13) . . ?
C1 Lu1 N2 125.22(15) . . ?
C13 Lu1 N2 93.40(15) . . ?
N1 Lu1 N2 87.91(13) . . ?
N3 Lu1 N2 120.04(14) . . ?
C1 Lu1 N4 92.19(16) . . ?
C13 Lu1 N4 151.62(16) . . ?
N1 Lu1 N4 74.98(13) . . ?
N3 Lu1 N4 73.83(13) . . ?
N2 Lu1 N4 72.56(13) . . ?
C23 B1 C35 101.2(3) . . ?
C23 B1 C17 115.2(4) . . ?
C35 B1 C17 112.7(4) . . ?
C23 B1 C29 112.8(4) . . ?
C35 B1 C29 114.2(3) . . ?
C17 B1 C29 101.3(3) . . ?
N1 C1 Lu1 74.0(3) . . ?
N1 C1 H1A 101(3) . . ?
Lu1 C1 H1A 111(3) . . ?
N1 C1 H1B 115(3) . . ?
Lu1 C1 H1B 133(3) . . ?
H1A C1 H1B 111(4) . . ?
N1 C2 H2A 109.5 . . ?
N1 C2 H2B 109.5 . . ?
H2A C2 H2B 109.5 . . ?
N1 C2 H2C 109.5 . . ?
H2A C2 H2C 109.5 . . ?
H2B C2 H2C 109.5 . . ?
N2 C3 H3A 109.5 . . ?
N2 C3 H3B 109.5 . . ?
H3A C3 H3B 109.5 . . ?
N2 C3 H3C 109.5 . . ?
H3A C3 H3C 109.5 . . ?
H3B C3 H3C 109.5 . . ?
N2 C4 H4A 109.5 . . ?
N2 C4 H4B 109.5 . . ?
H4A C4 H4B 109.5 . . ?
N2 C4 H4C 109.5 . . ?
H4A C4 H4C 109.5 . . ?
H4B C4 H4C 109.5 . . ?
N3 C5 H5A 109.5 . . ?
N3 C5 H5B 109.5 . . ?
H5A C5 H5B 109.5 . . ?
N3 C5 H5C 109.5 . . ?
H5A C5 H5C 109.5 . . ?
H5B C5 H5C 109.5 . . ?
N3 C6 H6A 109.5 . . ?
N3 C6 H6B 109.5 . . ?
H6A C6 H6B 109.5 . . ?
N3 C6 H6C 109.5 . . ?
H6A C6 H6C 109.5 . . ?
H6B C6 H6C 109.5 . . ?
N1 C7 C8 113.9(4) . . ?
N1 C7 H7A 108.8 . . ?
C8 C7 H7A 108.8 . . ?
N1 C7 H7B 108.8 . . ?
C8 C7 H7B 108.8 . . ?
H7A C7 H7B 107.7 . . ?
N4 C8 C7 114.5(4) . . ?
N4 C8 H8A 108.6 . . ?
C7 C8 H8A 108.6 . . ?
N4 C8 H8B 108.6 . . ?
C7 C8 H8B 108.6 . . ?
H8A C8 H8B 107.6 . . ?
N2 C9 C10 113.0(4) . . ?
N2 C9 H9A 109.0 . . ?
C10 C9 H9A 109.0 . . ?
N2 C9 H9B 109.0 . . ?
C10 C9 H9B 109.0 . . ?
H9A C9 H9B 107.8 . . ?
N4 C10 C9 113.1(4) . . ?
N4 C10 H10A 109.0 . . ?
C9 C10 H10A 109.0 . . ?
N4 C10 H10B 109.0 . . ?
C9 C10 H10B 109.0 . . ?
H10A C10 H10B 107.8 . . ?
N3 C11 C12 111.2(4) . . ?
N3 C11 H11A 109.4 . . ?
C12 C11 H11A 109.4 . . ?
N3 C11 H11B 109.4 . . ?
C12 C11 H11B 109.4 . . ?
H11A C11 H11B 108.0 . . ?
N4 C12 C11 112.6(4) . . ?
N4 C12 H12A 109.1 . . ?
C11 C12 H12A 109.1 . . ?
N4 C12 H12B 109.1 . . ?
C11 C12 H12B 109.1 . . ?
H12A C12 H12B 107.8 . . ?
Si1 C13 Lu1 116.7(2) . . ?
Si1 C13 H13A 108.1 . . ?
Lu1 C13 H13A 108.1 . . ?
Si1 C13 H13B 108.1 . . ?
Lu1 C13 H13B 108.1 . . ?
H13A C13 H13B 107.3 . . ?
Si1 C14 H14A 109.5 . . ?
Si1 C14 H14B 109.5 . . ?
H14A C14 H14B 109.5 . . ?
Si1 C14 H14C 109.5 . . ?
H14A C14 H14C 109.5 . . ?
H14B C14 H14C 109.5 . . ?
Si1 C15 H15A 109.5 . . ?
Si1 C15 H15B 109.5 . . ?
H15A C15 H15B 109.5 . . ?
Si1 C15 H15C 109.5 . . ?
H15A C15 H15C 109.5 . . ?
H15B C15 H15C 109.5 . . ?
Si1 C16 H16A 109.5 . . ?
Si1 C16 H16B 109.5 . . ?
H16A C16 H16B 109.5 . . ?
Si1 C16 H16C 109.5 . . ?
H16A C16 H16C 109.5 . . ?
H16B C16 H16C 109.5 . . ?
C18 C17 C22 113.7(4) . . ?
C18 C17 B1 128.0(4) . . ?
C22 C17 B1 118.1(4) . . ?
F1 C18 C17 121.1(4) . . ?
F1 C18 C19 116.6(4) . . ?
C17 C18 C19 122.3(5) . . ?
F2 C19 C20 120.0(4) . . ?
F2 C19 C18 119.5(5) . . ?
C20 C19 C18 120.5(4) . . ?
F3 C20 C19 120.2(4) . . ?
F3 C20 C21 119.9(5) . . ?
C19 C20 C21 119.9(4) . . ?
F4 C21 C20 120.2(4) . . ?
F4 C21 C22 121.7(4) . . ?
C20 C21 C22 118.1(5) . . ?
F5 C22 C21 115.6(4) . . ?
F5 C22 C17 118.9(4) . . ?
C21 C22 C17 125.4(4) . . ?
C28 C23 C24 112.4(4) . . ?
C28 C23 B1 127.4(4) . . ?
C24 C23 B1 119.6(4) . . ?
F6 C24 C25 116.3(4) . . ?
F6 C24 C23 118.7(4) . . ?
C25 C24 C23 124.9(4) . . ?
F7 C25 C26 119.9(4) . . ?
F7 C25 C24 120.3(4) . . ?
C26 C25 C24 119.8(4) . . ?
F8 C26 C25 121.3(4) . . ?
F8 C26 C27 120.4(4) . . ?
C25 C26 C27 118.3(4) . . ?
F9 C27 C28 120.6(4) . . ?
F9 C27 C26 119.6(4) . . ?
C28 C27 C26 119.7(4) . . ?
F10 C28 C27 114.1(4) . . ?
F10 C28 C23 121.0(4) . . ?
C27 C28 C23 124.8(4) . . ?
C34 C29 C30 113.5(4) . . ?
C34 C29 B1 127.1(4) . . ?
C30 C29 B1 119.1(4) . . ?
F11 C30 C31 116.4(4) . . ?
F11 C30 C29 118.9(4) . . ?
C31 C30 C29 124.6(4) . . ?
F12 C31 C32 120.0(4) . . ?
F12 C31 C30 120.5(4) . . ?
C32 C31 C30 119.4(4) . . ?
F13 C32 C31 120.6(4) . . ?
F13 C32 C33 120.3(4) . . ?
C31 C32 C33 119.2(4) . . ?
F14 C33 C32 120.5(4) . . ?
F14 C33 C34 119.7(4) . . ?
C32 C33 C34 119.8(4) . . ?
F15 C34 C29 121.3(4) . . ?
F15 C34 C33 115.2(4) . . ?
C29 C34 C33 123.5(4) . . ?
C36 C35 C40 112.8(4) . . ?
C36 C35 B1 127.7(4) . . ?
C40 C35 B1 119.1(4) . . ?
F16 C36 C37 114.6(4) . . ?
F16 C36 C35 120.5(4) . . ?
C37 C36 C35 124.8(4) . . ?
F17 C37 C36 120.6(4) . . ?
F17 C37 C38 119.6(4) . . ?
C36 C37 C38 119.8(4) . . ?
F18 C38 C39 121.2(4) . . ?
F18 C38 C37 120.0(4) . . ?
C39 C38 C37 118.8(4) . . ?
F19 C39 C38 119.8(4) . . ?
F19 C39 C40 120.3(4) . . ?
C38 C39 C40 119.8(4) . . ?
F20 C40 C39 116.6(4) . . ?
F20 C40 C35 119.4(4) . . ?
C39 C40 C35 124.0(4) . . ?
 
loop_
 _geom_torsion_atom_site_label_1
 _geom_torsion_atom_site_label_2
 _geom_torsion_atom_site_label_3
 _geom_torsion_atom_site_label_4
 _geom_torsion
 _geom_torsion_site_symmetry_1
 _geom_torsion_site_symmetry_2
 _geom_torsion_site_symmetry_3
 _geom_torsion_site_symmetry_4
 _geom_torsion_publ_flag
C2 N1 Lu1 C1 -103.0(5) . . . . ?
C7 N1 Lu1 C1 106.2(4) . . . . ?
C2 N1 Lu1 C13 -22.6(5) . . . . ?
C7 N1 Lu1 C13 -173.4(3) . . . . ?
C1 N1 Lu1 C13 80.4(3) . . . . ?
C2 N1 Lu1 N3 -162.6(4) . . . . ?
C7 N1 Lu1 N3 46.7(3) . . . . ?
C1 N1 Lu1 N3 -59.5(3) . . . . ?
C2 N1 Lu1 N2 70.1(4) . . . . ?
C7 N1 Lu1 N2 -80.7(3) . . . . ?
C1 N1 Lu1 N2 173.1(3) . . . . ?
C2 N1 Lu1 N4 142.6(4) . . . . ?
C7 N1 Lu1 N4 -8.2(3) . . . . ?
C1 N1 Lu1 N4 -114.4(3) . . . . ?
C6 N3 Lu1 C1 167.4(3) . . . . ?
C11 N3 Lu1 C1 -69.0(3) . . . . ?
C5 N3 Lu1 C1 47.6(3) . . . . ?
C6 N3 Lu1 C13 49.7(3) . . . . ?
C11 N3 Lu1 C13 173.4(3) . . . . ?
C5 N3 Lu1 C13 -70.1(3) . . . . ?
C6 N3 Lu1 N1 -159.7(3) . . . . ?
C11 N3 Lu1 N1 -36.1(4) . . . . ?
C5 N3 Lu1 N1 80.4(3) . . . . ?
C6 N3 Lu1 N2 -46.3(3) . . . . ?
C11 N3 Lu1 N2 77.3(3) . . . . ?
C5 N3 Lu1 N2 -166.1(3) . . . . ?
C6 N3 Lu1 N4 -104.4(3) . . . . ?
C11 N3 Lu1 N4 19.2(3) . . . . ?
C5 N3 Lu1 N4 135.8(3) . . . . ?
C3 N2 Lu1 C1 -67.7(4) . . . . ?
C4 N2 Lu1 C1 171.7(3) . . . . ?
C9 N2 Lu1 C1 53.4(4) . . . . ?
C3 N2 Lu1 C13 57.4(3) . . . . ?
C4 N2 Lu1 C13 -63.2(3) . . . . ?
C9 N2 Lu1 C13 178.5(3) . . . . ?
C3 N2 Lu1 N1 -72.9(3) . . . . ?
C4 N2 Lu1 N1 166.6(3) . . . . ?
C9 N2 Lu1 N1 48.3(3) . . . . ?
C3 N2 Lu1 N3 153.5(3) . . . . ?
C4 N2 Lu1 N3 32.9(4) . . . . ?
C9 N2 Lu1 N3 -85.4(3) . . . . ?
C3 N2 Lu1 N4 -147.8(3) . . . . ?
C4 N2 Lu1 N4 91.7(3) . . . . ?
C9 N2 Lu1 N4 -26.7(3) . . . . ?
C12 N4 Lu1 C1 113.0(3) . . . . ?
C8 N4 Lu1 C1 -3.5(3) . . . . ?
C10 N4 Lu1 C1 -122.9(3) . . . . ?
C12 N4 Lu1 C13 -57.5(5) . . . . ?
C8 N4 Lu1 C13 -173.9(3) . . . . ?
C10 N4 Lu1 C13 66.7(4) . . . . ?
C12 N4 Lu1 N1 146.8(3) . . . . ?
C8 N4 Lu1 N1 30.3(3) . . . . ?
C10 N4 Lu1 N1 -89.1(3) . . . . ?
C12 N4 Lu1 N3 8.9(3) . . . . ?
C8 N4 Lu1 N3 -107.6(3) . . . . ?
C10 N4 Lu1 N3 133.1(3) . . . . ?
C12 N4 Lu1 N2 -120.7(3) . . . . ?
C8 N4 Lu1 N2 122.8(3) . . . . ?
C10 N4 Lu1 N2 3.5(3) . . . . ?
C2 N1 C1 Lu1 129.3(4) . . . . ?
C7 N1 C1 Lu1 -105.9(3) . . . . ?
C13 Lu1 C1 N1 -123.4(3) . . . . ?
N3 Lu1 C1 N1 135.5(2) . . . . ?
N2 Lu1 C1 N1 -8.4(3) . . . . ?
N4 Lu1 C1 N1 61.7(3) . . . . ?
C2 N1 C7 C8 -174.4(4) . . . . ?
C1 N1 C7 C8 58.3(5) . . . . ?
Lu1 N1 C7 C8 -16.4(5) . . . . ?
C12 N4 C8 C7 -167.1(4) . . . . ?
C10 N4 C8 C7 68.5(5) . . . . ?
Lu1 N4 C8 C7 -51.9(4) . . . . ?
N1 C7 C8 N4 49.9(6) . . . . ?
C3 N2 C9 C10 171.8(4) . . . . ?
C4 N2 C9 C10 -66.6(5) . . . . ?
Lu1 N2 C9 C10 48.5(5) . . . . ?
C12 N4 C10 C9 143.1(4) . . . . ?
C8 N4 C10 C9 -93.1(5) . . . . ?
Lu1 N4 C10 C9 20.4(5) . . . . ?
N2 C9 C10 N4 -47.1(6) . . . . ?
C6 N3 C11 C12 80.3(5) . . . . ?
C5 N3 C11 C12 -160.3(4) . . . . ?
Lu1 N3 C11 C12 -46.2(5) . . . . ?
C8 N4 C12 C11 73.8(5) . . . . ?
C10 N4 C12 C11 -161.9(4) . . . . ?
Lu1 N4 C12 C11 -36.9(5) . . . . ?
N3 C11 C12 N4 57.9(6) . . . . ?
C16 Si1 C13 Lu1 -64.8(3) . . . . ?
C14 Si1 C13 Lu1 55.5(3) . . . . ?
C15 Si1 C13 Lu1 175.4(2) . . . . ?
C1 Lu1 C13 Si1 10.3(3) . . . . ?
N1 Lu1 C13 Si1 -31.7(3) . . . . ?
N3 Lu1 C13 Si1 117.8(3) . . . . ?
N2 Lu1 C13 Si1 -121.8(3) . . . . ?
N4 Lu1 C13 Si1 179.62(18) . . . . ?
C23 B1 C17 C18 12.6(6) . . . . ?
C35 B1 C17 C18 128.0(4) . . . . ?
C29 B1 C17 C18 -109.4(5) . . . . ?
C23 B1 C17 C22 -172.7(4) . . . . ?
C35 B1 C17 C22 -57.3(5) . . . . ?
C29 B1 C17 C22 65.2(5) . . . . ?
C22 C17 C18 F1 -179.3(4) . . . . ?
B1 C17 C18 F1 -4.5(7) . . . . ?
C22 C17 C18 C19 1.3(6) . . . . ?
B1 C17 C18 C19 176.2(4) . . . . ?
F1 C18 C19 F2 1.3(6) . . . . ?
C17 C18 C19 F2 -179.4(4) . . . . ?
F1 C18 C19 C20 -179.9(4) . . . . ?
C17 C18 C19 C20 -0.5(7) . . . . ?
F2 C19 C20 F3 -2.0(6) . . . . ?
C18 C19 C20 F3 179.1(4) . . . . ?
F2 C19 C20 C21 178.9(4) . . . . ?
C18 C19 C20 C21 0.1(7) . . . . ?
F3 C20 C21 F4 1.3(6) . . . . ?
C19 C20 C21 F4 -179.7(4) . . . . ?
F3 C20 C21 C22 -179.6(4) . . . . ?
C19 C20 C21 C22 -0.5(7) . . . . ?
F4 C21 C22 F5 -0.7(6) . . . . ?
C20 C21 C22 F5 -179.8(4) . . . . ?
F4 C21 C22 C17 -179.3(4) . . . . ?
C20 C21 C22 C17 1.6(7) . . . . ?
C18 C17 C22 F5 179.5(4) . . . . ?
B1 C17 C22 F5 4.1(6) . . . . ?
C18 C17 C22 C21 -1.9(6) . . . . ?
B1 C17 C22 C21 -177.3(4) . . . . ?
C35 B1 C23 C28 106.2(5) . . . . ?
C17 B1 C23 C28 -131.9(4) . . . . ?
C29 B1 C23 C28 -16.3(6) . . . . ?
C35 B1 C23 C24 -63.8(5) . . . . ?
C17 B1 C23 C24 58.1(5) . . . . ?
C29 B1 C23 C24 173.7(4) . . . . ?
C28 C23 C24 F6 -178.0(4) . . . . ?
B1 C23 C24 F6 -6.6(6) . . . . ?
C28 C23 C24 C25 -1.1(7) . . . . ?
B1 C23 C24 C25 170.4(4) . . . . ?
F6 C24 C25 F7 -1.6(7) . . . . ?
C23 C24 C25 F7 -178.6(4) . . . . ?
F6 C24 C25 C26 178.1(4) . . . . ?
C23 C24 C25 C26 1.0(8) . . . . ?
F7 C25 C26 F8 1.3(7) . . . . ?
C24 C25 C26 F8 -178.3(4) . . . . ?
F7 C25 C26 C27 -179.7(4) . . . . ?
C24 C25 C26 C27 0.6(7) . . . . ?
F8 C26 C27 F9 -0.4(7) . . . . ?
C25 C26 C27 F9 -179.3(4) . . . . ?
F8 C26 C27 C28 176.9(4) . . . . ?
C25 C26 C27 C28 -2.1(7) . . . . ?
F9 C27 C28 F10 1.1(6) . . . . ?
C26 C27 C28 F10 -176.2(4) . . . . ?
F9 C27 C28 C23 179.3(4) . . . . ?
C26 C27 C28 C23 2.1(7) . . . . ?
C24 C23 C28 F10 177.6(4) . . . . ?
B1 C23 C28 F10 7.0(7) . . . . ?
C24 C23 C28 C27 -0.5(6) . . . . ?
B1 C23 C28 C27 -171.1(4) . . . . ?
C23 B1 C29 C34 129.3(5) . . . . ?
C35 B1 C29 C34 14.5(6) . . . . ?
C17 B1 C29 C34 -107.0(5) . . . . ?
C23 B1 C29 C30 -57.8(5) . . . . ?
C35 B1 C29 C30 -172.6(4) . . . . ?
C17 B1 C29 C30 65.9(5) . . . . ?
C34 C29 C30 F11 178.9(4) . . . . ?
B1 C29 C30 F11 5.0(6) . . . . ?
C34 C29 C30 C31 -3.8(6) . . . . ?
B1 C29 C30 C31 -177.7(4) . . . . ?
F11 C30 C31 F12 -0.5(6) . . . . ?
C29 C30 C31 F12 -177.9(4) . . . . ?
F11 C30 C31 C32 -179.9(4) . . . . ?
C29 C30 C31 C32 2.7(7) . . . . ?
F12 C31 C32 F13 1.1(6) . . . . ?
C30 C31 C32 F13 -179.5(4) . . . . ?
F12 C31 C32 C33 -179.6(4) . . . . ?
C30 C31 C32 C33 -0.1(7) . . . . ?
F13 C32 C33 F14 -3.2(7) . . . . ?
C31 C32 C33 F14 177.4(4) . . . . ?
F13 C32 C33 C34 178.5(4) . . . . ?
C31 C32 C33 C34 -0.9(7) . . . . ?
C30 C29 C34 F15 -176.3(4) . . . . ?
B1 C29 C34 F15 -3.0(7) . . . . ?
C30 C29 C34 C33 2.7(6) . . . . ?
B1 C29 C34 C33 176.0(4) . . . . ?
F14 C33 C34 F15 0.2(6) . . . . ?
C32 C33 C34 F15 178.5(4) . . . . ?
F14 C33 C34 C29 -178.8(4) . . . . ?
C32 C33 C34 C29 -0.5(7) . . . . ?
C23 B1 C35 C36 108.1(5) . . . . ?
C17 B1 C35 C36 -15.5(6) . . . . ?
C29 B1 C35 C36 -130.5(4) . . . . ?
C23 B1 C35 C40 -63.8(4) . . . . ?
C17 B1 C35 C40 172.5(4) . . . . ?
C29 B1 C35 C40 57.6(5) . . . . ?
C40 C35 C36 F16 178.4(4) . . . . ?
B1 C35 C36 F16 6.1(7) . . . . ?
C40 C35 C36 C37 -2.3(6) . . . . ?
B1 C35 C36 C37 -174.7(4) . . . . ?
F16 C36 C37 F17 1.7(6) . . . . ?
C35 C36 C37 F17 -177.5(4) . . . . ?
F16 C36 C37 C38 -179.1(4) . . . . ?
C35 C36 C37 C38 1.7(7) . . . . ?
F17 C37 C38 F18 -1.4(6) . . . . ?
C36 C37 C38 F18 179.4(4) . . . . ?
F17 C37 C38 C39 179.4(4) . . . . ?
C36 C37 C38 C39 0.2(7) . . . . ?
F18 C38 C39 F19 -1.7(7) . . . . ?
C37 C38 C39 F19 177.5(4) . . . . ?
F18 C38 C39 C40 179.7(4) . . . . ?
C37 C38 C39 C40 -1.2(7) . . . . ?
F19 C39 C40 F20 0.9(6) . . . . ?
C38 C39 C40 F20 179.5(4) . . . . ?
F19 C39 C40 C35 -178.3(4) . . . . ?
C38 C39 C40 C35 0.3(7) . . . . ?
C36 C35 C40 F20 -177.8(4) . . . . ?
B1 C35 C40 F20 -4.7(6) . . . . ?
C36 C35 C40 C39 1.3(6) . . . . ?
B1 C35 C40 C39 174.4(4) . . . . ?
 
_diffrn_measured_fraction_theta_max    0.965
_diffrn_reflns_theta_full              25.00
_diffrn_measured_fraction_theta_full   1.000
_refine_diff_density_max    2.721
_refine_diff_density_min   -2.119
_refine_diff_density_rms    0.152

#==END

 
data_3-Lu
 
_audit_creation_method            SHELXL-97
_chemical_name_systematic
;
 ?
;
_chemical_name_common             ?
_chemical_melting_point           ?
_chemical_formula_moiety          
 'C24 H60 Lu2 N8, 2(C32 H12 B F24), 2(C4 H10 O)'
_chemical_formula_sum
 'C96 H104 B2 F48 Lu2 N8 O2'
_chemical_formula_weight          2685.43
 
loop_
 _atom_type_symbol
 _atom_type_description
 _atom_type_scat_dispersion_real
 _atom_type_scat_dispersion_imag
 _atom_type_scat_source
 'C'  'C'   0.0033   0.0016
 'International Tables Vol C Tables 4.2.6.8 and 6.1.1.4'
 'H'  'H'   0.0000   0.0000
 'International Tables Vol C Tables 4.2.6.8 and 6.1.1.4'
 'B'  'B'   0.0013   0.0007
 'International Tables Vol C Tables 4.2.6.8 and 6.1.1.4'
 'F'  'F'   0.0171   0.0103
 'International Tables Vol C Tables 4.2.6.8 and 6.1.1.4'
 'N'  'N'   0.0061   0.0033
 'International Tables Vol C Tables 4.2.6.8 and 6.1.1.4'
 'O'  'O'   0.0106   0.0060
 'International Tables Vol C Tables 4.2.6.8 and 6.1.1.4'
 'Lu'  'Lu'  -0.4720   5.8584
 'International Tables Vol C Tables 4.2.6.8 and 6.1.1.4'
 
_symmetry_cell_setting            triclinic
_symmetry_space_group_name_H-M    'P-1'
_symmetry_space_group_name_Hall   '-P1'
 
loop_
 _symmetry_equiv_pos_as_xyz
 'x, y, z'
 '-x, -y, -z'
 
_cell_length_a                    12.7280(4)
_cell_length_b                    13.8763(5)
_cell_length_c                    17.1508(6)
_cell_angle_alpha                 69.4343(12)
_cell_angle_beta                  71.3166(13)
_cell_angle_gamma                 81.3633(13)
_cell_volume                      2684.21(16)
_cell_formula_units_Z             1
_cell_measurement_temperature     100(2)
_cell_measurement_reflns_used     6643
_cell_measurement_theta_min        3.1
_cell_measurement_theta_max       28.9

 
_exptl_crystal_description        block
_exptl_crystal_colour             colourless
_exptl_crystal_size_max           0.23
_exptl_crystal_size_mid           0.17
_exptl_crystal_size_min           0.17
_exptl_crystal_density_meas       ?
_exptl_crystal_density_diffrn     1.661
_exptl_crystal_density_method     'not measured'
_exptl_crystal_F_000              1336
_exptl_absorpt_coefficient_mu     1.962
_exptl_absorpt_correction_type    multi-scan
_exptl_absorpt_correction_T_min   0.6610
_exptl_absorpt_correction_T_max   0.7314
_exptl_absorpt_process_details    'Platon Mulabs'
 
_exptl_special_details
;
 ?
;
 
_diffrn_ambient_temperature       100(2)
_diffrn_radiation_wavelength      0.71073
_diffrn_radiation_type            MoK\a
_diffrn_radiation_source          'INCOATEC microsource' 
_diffrn_radiation_monochromator   'multilayer optics'
_diffrn_measurement_device_type   'APEX Area Detector' 
_diffrn_measurement_method        'omega scans'
_diffrn_detector_area_resol_mean  ?
_diffrn_standards_number          ?
_diffrn_standards_interval_count  ?
_diffrn_standards_interval_time   ?
_diffrn_standards_decay_%         ?
_diffrn_reflns_number             104006
_diffrn_reflns_av_R_equivalents   0.1579
_diffrn_reflns_av_sigmaI/netI     0.1710
_diffrn_reflns_limit_h_min        -23
_diffrn_reflns_limit_h_max        24
_diffrn_reflns_limit_k_min        -23
_diffrn_reflns_limit_k_max        26
_diffrn_reflns_limit_l_min        -29
_diffrn_reflns_limit_l_max        29
_diffrn_reflns_theta_min          2.05
_diffrn_reflns_theta_max          42.49
_reflns_number_total              31416
_reflns_number_gt                 17218
_reflns_threshold_expression      >2sigma(I)
 
_computing_data_collection        'Bruker SMART (2001)'
_computing_cell_refinement        'Bruker SMART (2001)'
_computing_data_reduction         'Bruker SAINT+ (1999)'
_computing_structure_solution     'SIR-92 (Altomare 1992)'
_computing_structure_refinement   'SHELXL-97 (Sheldrick, 1997)'
_computing_molecular_graphics     'ORTEP-III (Farrugia, 1999)'
 
_refine_special_details
;
 Refinement of F^2^ against ALL reflections.  The weighted R-factor wR and
 goodness of fit S are based on F^2^, conventional R-factors R are based
 on F, with F set to zero for negative F^2^. The threshold expression of
 F^2^ > 2sigma(F^2^) is used only for calculating R-factors(gt) etc. and is
 not relevant to the choice of reflections for refinement.  R-factors based
 on F^2^ are statistically about twice as large as those based on F, and R-
 factors based on ALL data will be even larger.
;
 
_refine_ls_structure_factor_coef  Fsqd
_refine_ls_matrix_type            full
_refine_ls_weighting_scheme       calc
_refine_ls_weighting_details
 'calc w=1/[\s^2^(Fo^2^)+(0.0000P)^2^+0.0000P] where P=(Fo^2^+2Fc^2^)/3'
_atom_sites_solution_primary      direct
_atom_sites_solution_secondary    difmap
_atom_sites_solution_hydrogens    geom
_refine_ls_hydrogen_treatment     mixed
_refine_ls_extinction_method      none
_refine_ls_extinction_coef        ?
_refine_ls_number_reflns          31416
_refine_ls_number_parameters      892
_refine_ls_number_restraints      45
_refine_ls_R_factor_all           0.1017
_refine_ls_R_factor_gt            0.0506
_refine_ls_wR_factor_ref          0.0986
_refine_ls_wR_factor_gt           0.0873
_refine_ls_goodness_of_fit_ref    0.801
_refine_ls_restrained_S_all       0.806
_refine_ls_shift/su_max           0.003
_refine_ls_shift/su_mean          0.000
 
loop_
 _atom_site_label
 _atom_site_type_symbol
 _atom_site_fract_x
 _atom_site_fract_y
 _atom_site_fract_z
 _atom_site_U_iso_or_equiv
 _atom_site_adp_type
 _atom_site_occupancy
 _atom_site_symmetry_multiplicity
 _atom_site_calc_flag
 _atom_site_refinement_flags
 _atom_site_disorder_assembly
 _atom_site_disorder_group
Lu1 Lu 0.510990(8) 0.106097(8) 0.529903(6) 0.01969(3) Uani 1 1 d . . .
H1 H 0.437(2) -0.026(2) 0.5616(16) 0.024 Uiso 1 1 d . . .
O1 O 0.7975(2) 0.62720(19) 0.87191(15) 0.0508(6) Uani 1 1 d . . .
N1 N 0.5967(2) 0.24708(18) 0.40658(14) 0.0304(5) Uani 1 1 d . C .
N2 N 0.35710(19) 0.12016(18) 0.65101(14) 0.0290(5) Uani 1 1 d . C .
N3 N 0.6627(3) 0.0265(2) 0.5945(2) 0.0507(7) Uani 1 1 d DU C .
N4 N 0.56041(19) 0.22953(18) 0.58676(14) 0.0293(5) Uani 1 1 d . C .
F1 F 0.52665(19) 0.5434(2) 0.22221(15) 0.0753(8) Uani 1 1 d . . .
F2 F 0.62664(19) 0.5865(3) 0.09078(16) 0.0887(10) Uani 1 1 d . . .
F3 F 0.58763(17) 0.69151(18) 0.16081(14) 0.0593(6) Uani 1 1 d . . .
F4A F 0.2346(5) 0.7052(8) -0.0769(4) 0.0487(16) Uani 0.62(2) 1 d PU A -1
F5A F 0.3971(7) 0.6272(7) -0.1004(5) 0.0598(17) Uani 0.62(2) 1 d PU A -1
F6A F 0.3810(8) 0.7905(7) -0.1336(3) 0.0572(19) Uani 0.62(2) 1 d PU A -1
F4B F 0.2505(11) 0.6650(11) -0.0692(7) 0.049(2) Uani 0.38(2) 1 d PU A -2
F5B F 0.4210(8) 0.6691(12) -0.1183(6) 0.051(3) Uani 0.38(2) 1 d PU A -2
F6B F 0.3345(13) 0.8119(8) -0.1239(7) 0.058(3) Uani 0.38(2) 1 d PU A -2
F7 F 0.42244(18) 1.1063(2) 0.01385(13) 0.0711(8) Uani 1 1 d . . .
F8 F 0.47661(16) 1.01666(17) 0.12230(14) 0.0585(6) Uani 1 1 d . . .
F9 F 0.4072(2) 1.16799(19) 0.11463(18) 0.0823(8) Uani 1 1 d . . .
F10 F -0.08211(18) 1.14231(19) 0.20684(15) 0.0666(7) Uani 1 1 d . . .
F11 F -0.06574(18) 1.07042(16) 0.33398(12) 0.0558(5) Uani 1 1 d . . .
F12 F 0.01487(18) 1.21013(15) 0.25391(13) 0.0555(5) Uani 1 1 d . . .
F13 F -0.09183(16) 0.46495(13) 0.28006(12) 0.0471(5) Uani 1 1 d . . .
F14 F -0.24263(18) 0.54283(16) 0.32441(13) 0.0630(6) Uani 1 1 d . . .
F15 F -0.20265(18) 0.51847(14) 0.20202(12) 0.0512(6) Uani 1 1 d . . .
F16 F -0.14077(16) 0.99550(14) 0.05673(11) 0.0428(4) Uani 1 1 d . . .
F17 F -0.25079(18) 0.89218(18) 0.05915(15) 0.0764(9) Uani 1 1 d . . .
F18 F -0.08703(19) 0.90954(15) -0.03044(10) 0.0527(5) Uani 1 1 d . . .
F19 F 0.30940(15) 0.45411(14) 0.47997(12) 0.0455(5) Uani 1 1 d . . .
F20 F 0.14999(16) 0.39057(14) 0.54940(11) 0.0467(5) Uani 1 1 d . . .
F21 F 0.2242(2) 0.39712(14) 0.41711(12) 0.0565(6) Uani 1 1 d . . .
F22A F -0.0451(3) 0.6884(3) 0.62029(15) 0.0621(10) Uani 0.816(7) 1 d P B -1
F23A F -0.1034(3) 0.8010(2) 0.52081(15) 0.0499(9) Uani 0.816(7) 1 d P B -1
F24A F 0.0453(3) 0.8257(3) 0.5402(2) 0.0797(18) Uani 0.816(7) 1 d P B -1
F22B F -0.0851(14) 0.7113(14) 0.5968(11) 0.068(5) Uani 0.184(7) 1 d PU B -2
F23B F -0.0255(16) 0.8485(11) 0.5085(7) 0.064(6) Uani 0.184(7) 1 d P B -2
F24B F 0.0659(9) 0.7480(9) 0.5896(7) 0.036(3) Uani 0.184(7) 1 d P B -2
B1 B 0.1475(2) 0.7719(2) 0.21822(16) 0.0195(5) Uani 1 1 d . . .
C1A C 0.4774(4) 0.2479(4) 0.4167(3) 0.0338(12) Uani 0.572(3) 1 d P C -1
H1A H 0.4578 0.2324 0.3710 0.041 Uiso 0.572(3) 1 calc PR C -1
H1B H 0.4314 0.3055 0.4337 0.041 Uiso 0.572(3) 1 calc PR C -1
C2A C 0.6711(6) 0.2425(5) 0.3204(3) 0.0445(15) Uani 0.572(3) 1 d P C -1
H2A H 0.6698 0.3101 0.2761 0.067 Uiso 0.572(3) 1 calc PR C -1
H2B H 0.6452 0.1910 0.3045 0.067 Uiso 0.572(3) 1 calc PR C -1
H2C H 0.7471 0.2234 0.3242 0.067 Uiso 0.572(3) 1 calc PR C -1
C3A C 0.2484(4) 0.1294(4) 0.6296(3) 0.0324(11) Uani 0.572(3) 1 d P C -1
H3A H 0.2401 0.0675 0.6174 0.049 Uiso 0.572(3) 1 calc PR C -1
H3B H 0.2485 0.1901 0.5784 0.049 Uiso 0.572(3) 1 calc PR C -1
H3C H 0.1865 0.1366 0.6791 0.049 Uiso 0.572(3) 1 calc PR C -1
C4A C 0.3505(5) 0.0351(5) 0.7311(3) 0.0392(13) Uani 0.572(3) 1 d P C -1
H4A H 0.2862 0.0470 0.7772 0.059 Uiso 0.572(3) 1 calc PR C -1
H4B H 0.4183 0.0298 0.7479 0.059 Uiso 0.572(3) 1 calc PR C -1
H4C H 0.3424 -0.0291 0.7222 0.059 Uiso 0.572(3) 1 calc PR C -1
C5A C 0.6645(5) -0.0785(4) 0.6318(4) 0.0410(14) Uani 0.572(3) 1 d P C -1
H5A H 0.7354 -0.1025 0.6446 0.062 Uiso 0.572(3) 1 calc PR C -1
H5B H 0.6557 -0.1103 0.5916 0.062 Uiso 0.572(3) 1 calc PR C -1
H5C H 0.6036 -0.0978 0.6859 0.062 Uiso 0.572(3) 1 calc PR C -1
C6A C 0.7738(5) 0.0429(4) 0.5069(4) 0.0460(12) Uani 0.572(3) 1 d PDU C -1
H6A H 0.7837 0.1167 0.4759 0.069 Uiso 0.572(3) 1 calc PR C -1
H6B H 0.7628 0.0099 0.4683 0.069 Uiso 0.572(3) 1 calc PR C -1
H6C H 0.8399 0.0117 0.5253 0.069 Uiso 0.572(3) 1 calc PR C -1
C7A C 0.6303(6) 0.3295(6) 0.4257(5) 0.0323(14) Uani 0.572(3) 1 d P C -1
H7A H 0.6197 0.3960 0.3815 0.039 Uiso 0.572(3) 1 calc PR C -1
H7B H 0.7103 0.3193 0.4216 0.039 Uiso 0.572(3) 1 calc PR C -1
C8A C 0.5644(5) 0.3346(4) 0.5164(4) 0.0338(12) Uani 0.572(3) 1 d P C -1
H8A H 0.5990 0.3836 0.5301 0.041 Uiso 0.572(3) 1 calc PR C -1
H8B H 0.4877 0.3610 0.5162 0.041 Uiso 0.572(3) 1 calc PR C -1
C9A C 0.3616(8) 0.2233(6) 0.6637(5) 0.0329(15) Uani 0.572(3) 1 d P C -1
H9A H 0.3436 0.2808 0.6152 0.039 Uiso 0.572(3) 1 calc PR C -1
H9B H 0.3064 0.2261 0.7188 0.039 Uiso 0.572(3) 1 calc PR C -1
C10A C 0.4773(5) 0.2339(5) 0.6662(4) 0.0327(13) Uani 0.572(3) 1 d P C -1
H10A H 0.4806 0.3004 0.6745 0.039 Uiso 0.572(3) 1 calc PR C -1
H10B H 0.4935 0.1778 0.7162 0.039 Uiso 0.572(3) 1 calc PR C -1
C11A C 0.6911(17) 0.0870(15) 0.6394(13) 0.036(3) Uani 0.572(3) 1 d P C -1
H11A H 0.7702 0.0723 0.6377 0.043 Uiso 0.572(3) 1 calc PR C -1
H11B H 0.6463 0.0645 0.7012 0.043 Uiso 0.572(3) 1 calc PR C -1
C12A C 0.6722(5) 0.2017(4) 0.6011(4) 0.0350(12) Uani 0.572(3) 1 d P C -1
H12A H 0.6799 0.2359 0.6407 0.042 Uiso 0.572(3) 1 calc PR C -1
H12B H 0.7300 0.2276 0.5449 0.042 Uiso 0.572(3) 1 calc PR C -1
C1B C 0.3276(5) 0.1681(5) 0.5714(4) 0.0273(13) Uani 0.428(3) 1 d P C -2
H1C H 0.3159 0.2440 0.5536 0.033 Uiso 0.428(3) 1 calc PR C -2
H1D H 0.2713 0.1334 0.5632 0.033 Uiso 0.428(3) 1 calc PR C -2
C2B C 0.2852(7) 0.0358(6) 0.7147(4) 0.0397(18) Uani 0.428(3) 1 d P C -2
H2D H 0.3054 0.0116 0.7692 0.060 Uiso 0.428(3) 1 calc PR C -2
H2E H 0.2951 -0.0211 0.6914 0.060 Uiso 0.428(3) 1 calc PR C -2
H2F H 0.2075 0.0611 0.7257 0.060 Uiso 0.428(3) 1 calc PR C -2
C3B C 0.5293(7) 0.2764(6) 0.3401(4) 0.0406(18) Uani 0.428(3) 1 d P C -2
H3D H 0.4517 0.2923 0.3683 0.061 Uiso 0.428(3) 1 calc PR C -2
H3E H 0.5329 0.2186 0.3189 0.061 Uiso 0.428(3) 1 calc PR C -2
H3F H 0.5605 0.3369 0.2911 0.061 Uiso 0.428(3) 1 calc PR C -2
C4B C 0.7112(6) 0.2258(6) 0.3640(5) 0.0391(17) Uani 0.428(3) 1 d P C -2
H4D H 0.7381 0.2835 0.3108 0.059 Uiso 0.428(3) 1 calc PR C -2
H4E H 0.7169 0.1628 0.3491 0.059 Uiso 0.428(3) 1 calc PR C -2
H4F H 0.7562 0.2165 0.4032 0.059 Uiso 0.428(3) 1 calc PR C -2
C5B C 0.5855(6) -0.0542(6) 0.6950(4) 0.0357(16) Uani 0.428(3) 1 d PD C -2
H5D H 0.6358 -0.0935 0.7291 0.053 Uiso 0.428(3) 1 calc PR C -2
H5E H 0.5453 -0.1018 0.6852 0.053 Uiso 0.428(3) 1 calc PR C -2
H5F H 0.5324 -0.0123 0.7267 0.053 Uiso 0.428(3) 1 calc PR C -2
C6B C 0.7268(6) -0.0469(6) 0.5643(5) 0.0392(17) Uani 0.428(3) 1 d P C -2
H6D H 0.7766 -0.0144 0.5063 0.059 Uiso 0.428(3) 1 calc PR C -2
H6E H 0.6795 -0.0938 0.5606 0.059 Uiso 0.428(3) 1 calc PR C -2
H6F H 0.7708 -0.0857 0.6039 0.059 Uiso 0.428(3) 1 calc PR C -2
C7B C 0.3726(9) 0.1898(8) 0.6934(7) 0.038(2) Uani 0.428(3) 1 d P C -2
H7C H 0.3985 0.1488 0.7445 0.045 Uiso 0.428(3) 1 calc PR C -2
H7D H 0.3000 0.2235 0.7147 0.045 Uiso 0.428(3) 1 calc PR C -2
C8B C 0.4525(7) 0.2700(7) 0.6361(6) 0.038(2) Uani 0.428(3) 1 d P C -2
H8C H 0.4686 0.3055 0.6717 0.046 Uiso 0.428(3) 1 calc PR C -2
H8D H 0.4178 0.3217 0.5938 0.046 Uiso 0.428(3) 1 calc PR C -2
C9B C 0.5831(8) 0.3378(8) 0.4392(7) 0.040(2) Uani 0.428(3) 1 d P C -2
H9C H 0.6251 0.3958 0.3922 0.048 Uiso 0.428(3) 1 calc PR C -2
H9D H 0.5038 0.3605 0.4539 0.048 Uiso 0.428(3) 1 calc PR C -2
C10B C 0.6225(8) 0.3125(6) 0.5163(6) 0.046(2) Uani 0.428(3) 1 d P C -2
H10C H 0.7024 0.2917 0.5016 0.055 Uiso 0.428(3) 1 calc PR C -2
H10D H 0.6133 0.3741 0.5348 0.055 Uiso 0.428(3) 1 calc PR C -2
C11B C 0.696(2) 0.093(2) 0.6231(18) 0.038(5) Uani 0.428(3) 1 d P C -2
H11C H 0.7584 0.1308 0.5747 0.046 Uiso 0.428(3) 1 calc PR C -2
H11D H 0.7286 0.0510 0.6705 0.046 Uiso 0.428(3) 1 calc PR C -2
C12B C 0.6228(7) 0.1701(7) 0.6544(6) 0.0416(19) Uani 0.428(3) 1 d P C -2
H12C H 0.6659 0.2180 0.6622 0.050 Uiso 0.428(3) 1 calc PR C -2
H12D H 0.5694 0.1366 0.7112 0.050 Uiso 0.428(3) 1 calc PR C -2
C13 C 0.2523(2) 0.72690(18) 0.15495(14) 0.0202(5) Uani 1 1 d . . .
C14 C 0.3528(2) 0.6910(2) 0.17418(15) 0.0227(5) Uani 1 1 d . . .
H14 H 0.3590 0.6900 0.2282 0.027 Uiso 1 1 calc R . .
C15 C 0.4435(2) 0.6570(2) 0.11858(16) 0.0258(5) Uani 1 1 d . . .
C16 C 0.4409(2) 0.6603(2) 0.03699(16) 0.0286(5) Uani 1 1 d . . .
H16 H 0.5031 0.6378 -0.0019 0.034 Uiso 1 1 calc R . .
C17 C 0.3428(2) 0.6982(2) 0.01516(15) 0.0267(5) Uani 1 1 d . A .
C18 C 0.2520(2) 0.72997(19) 0.07206(14) 0.0224(5) Uani 1 1 d . . .
H18 H 0.1866 0.7549 0.0546 0.027 Uiso 1 1 calc R . .
C19 C 0.5462(2) 0.6190(3) 0.14599(19) 0.0355(6) Uani 1 1 d . . .
C20 C 0.3374(3) 0.7071(3) -0.07314(18) 0.0395(7) Uani 1 1 d . . .
C21 C 0.1649(2) 0.89345(18) 0.19925(13) 0.0192(4) Uani 1 1 d . . .
C22 C 0.2677(2) 0.93923(19) 0.15687(14) 0.0217(5) Uani 1 1 d . . .
H22 H 0.3300 0.8992 0.1349 0.026 Uiso 1 1 calc R . .
C23 C 0.2819(2) 1.0411(2) 0.14570(16) 0.0264(5) Uani 1 1 d . . .
C24 C 0.1944(2) 1.1030(2) 0.17641(16) 0.0275(6) Uani 1 1 d . . .
H24 H 0.2045 1.1724 0.1693 0.033 Uiso 1 1 calc R . .
C25 C 0.0913(2) 1.0602(2) 0.21791(15) 0.0242(5) Uani 1 1 d . . .
C26 C 0.0775(2) 0.9587(2) 0.22746(14) 0.0224(5) Uani 1 1 d . . .
H26 H 0.0052 0.9326 0.2545 0.027 Uiso 1 1 calc R . .
C27 C 0.3949(3) 1.0842(2) 0.0983(2) 0.0395(7) Uani 1 1 d . . .
C28 C -0.0081(3) 1.1220(2) 0.25163(19) 0.0369(7) Uani 1 1 d . . .
C29 C 0.03393(19) 0.75658(19) 0.19868(13) 0.0183(4) Uani 1 1 d . . .
C30 C -0.0157(2) 0.66160(19) 0.23359(14) 0.0204(5) Uani 1 1 d . . .
H30 H 0.0120 0.6069 0.2748 0.025 Uiso 1 1 calc R . .
C31 C -0.1047(2) 0.6443(2) 0.20999(14) 0.0224(5) Uani 1 1 d . . .
C32 C -0.1483(2) 0.7221(2) 0.15069(14) 0.0233(5) Uani 1 1 d . . .
H32 H -0.2085 0.7104 0.1341 0.028 Uiso 1 1 calc R . .
C33 C -0.1015(2) 0.8174(2) 0.11635(14) 0.0230(5) Uani 1 1 d . . .
C34 C -0.0118(2) 0.8343(2) 0.13881(14) 0.0227(5) Uani 1 1 d . . .
H34 H 0.0194 0.9002 0.1130 0.027 Uiso 1 1 calc R . .
C35 C -0.1588(2) 0.5431(2) 0.25252(17) 0.0313(6) Uani 1 1 d . . .
C36 C -0.1454(2) 0.9033(2) 0.05090(17) 0.0342(7) Uani 1 1 d . . .
C37 C 0.13302(19) 0.70806(19) 0.32338(14) 0.0200(5) Uani 1 1 d . . .
C38 C 0.1725(2) 0.60666(19) 0.35344(15) 0.0218(5) Uani 1 1 d . . .
H38 H 0.2116 0.5724 0.3126 0.026 Uiso 1 1 calc R . .
C39 C 0.1560(2) 0.5539(2) 0.44252(16) 0.0256(5) Uani 1 1 d . . .
C40 C 0.0971(2) 0.5999(2) 0.50394(16) 0.0280(6) Uani 1 1 d . . .
H40 H 0.0856 0.5640 0.5642 0.034 Uiso 1 1 calc R . .
C41 C 0.0556(2) 0.6987(2) 0.47572(15) 0.0267(5) Uani 1 1 d . B .
C42 C 0.0743(2) 0.7523(2) 0.38689(14) 0.0228(5) Uani 1 1 d . . .
H42 H 0.0458 0.8213 0.3693 0.027 Uiso 1 1 calc R . .
C43 C 0.2088(3) 0.4498(2) 0.47086(18) 0.0328(6) Uani 1 1 d . . .
C44 C -0.0090(3) 0.7532(3) 0.53935(18) 0.0385(7) Uani 1 1 d . . .
C45 C 0.9011(5) 0.6289(4) 0.9635(3) 0.0837(15) Uani 1 1 d . . .
H45A H 0.9553 0.6780 0.9191 0.126 Uiso 1 1 calc R . .
H45B H 0.9358 0.5821 1.0072 0.126 Uiso 1 1 calc R . .
H45C H 0.8375 0.6664 0.9916 0.126 Uiso 1 1 calc R . .
C46 C 0.8638(4) 0.5696(3) 0.9230(3) 0.0741(13) Uani 1 1 d . . .
H46A H 0.9294 0.5412 0.8867 0.089 Uiso 1 1 calc R . .
H46B H 0.8219 0.5109 0.9690 0.089 Uiso 1 1 calc R . .
C47 C 0.7594(4) 0.5746(3) 0.8306(3) 0.0730(13) Uani 1 1 d . . .
H47A H 0.7176 0.5148 0.8750 0.088 Uiso 1 1 calc R . .
H47B H 0.8237 0.5482 0.7918 0.088 Uiso 1 1 calc R . .
C48 C 0.6883(4) 0.6408(4) 0.7801(3) 0.0682(12) Uani 1 1 d . . .
H48A H 0.6214 0.6624 0.8190 0.102 Uiso 1 1 calc R . .
H48B H 0.6671 0.6030 0.7491 0.102 Uiso 1 1 calc R . .
H48C H 0.7283 0.7017 0.7379 0.102 Uiso 1 1 calc R . .
 
loop_
 _atom_site_aniso_label
 _atom_site_aniso_U_11
 _atom_site_aniso_U_22
 _atom_site_aniso_U_33
 _atom_site_aniso_U_23
 _atom_site_aniso_U_13
 _atom_site_aniso_U_12
Lu1 0.01916(5) 0.02139(5) 0.01923(5) -0.00612(4) -0.00480(3) -0.00579(4)
O1 0.0634(17) 0.0408(14) 0.0454(13) -0.0143(11) -0.0097(12) -0.0062(12)
N1 0.0299(12) 0.0243(11) 0.0277(11) -0.0013(9) -0.0001(9) -0.0100(9)
N2 0.0272(12) 0.0312(12) 0.0273(11) -0.0107(9) -0.0026(9) -0.0063(9)
N3 0.0592(18) 0.0463(17) 0.0737(19) -0.0349(15) -0.0479(15) 0.0199(14)
N4 0.0248(11) 0.0330(13) 0.0360(12) -0.0179(10) -0.0075(9) -0.0048(9)
F1 0.0480(13) 0.0736(17) 0.0820(16) 0.0214(13) -0.0388(13) -0.0070(12)
F2 0.0454(14) 0.163(3) 0.0813(16) -0.0786(18) -0.0317(13) 0.0522(16)
F3 0.0384(11) 0.0684(15) 0.0868(15) -0.0280(12) -0.0340(11) -0.0062(10)
F4A 0.042(2) 0.081(4) 0.033(2) -0.025(2) -0.0163(16) -0.003(2)
F5A 0.081(3) 0.062(3) 0.047(3) -0.037(2) -0.015(2) 0.006(3)
F6A 0.072(4) 0.068(3) 0.0255(18) 0.0018(18) -0.014(2) -0.026(3)
F4B 0.053(4) 0.064(5) 0.040(3) -0.016(3) -0.020(3) -0.018(3)
F5B 0.052(4) 0.073(5) 0.034(3) -0.031(3) -0.009(2) 0.006(3)
F6B 0.075(5) 0.058(4) 0.032(3) 0.000(2) -0.023(3) 0.007(3)
F7 0.0459(13) 0.101(2) 0.0492(12) 0.0050(12) -0.0060(10) -0.0416(13)
F8 0.0314(10) 0.0558(13) 0.0800(14) -0.0036(11) -0.0204(10) -0.0132(9)
F9 0.0496(14) 0.0613(15) 0.143(2) -0.0531(15) -0.0029(14) -0.0300(12)
F10 0.0565(14) 0.0878(18) 0.0785(14) -0.0520(14) -0.0415(12) 0.0402(12)
F11 0.0572(13) 0.0489(13) 0.0455(11) -0.0177(9) 0.0093(9) -0.0038(10)
F12 0.0646(14) 0.0348(11) 0.0665(13) -0.0286(10) -0.0045(11) -0.0027(10)
F13 0.0558(12) 0.0263(9) 0.0626(12) 0.0039(8) -0.0373(10) -0.0116(8)
F14 0.0581(14) 0.0478(12) 0.0613(12) -0.0124(10) 0.0207(10) -0.0358(11)
F15 0.0726(14) 0.0349(10) 0.0601(11) 0.0007(9) -0.0464(11) -0.0228(10)
F16 0.0529(12) 0.0335(10) 0.0402(9) -0.0002(8) -0.0267(9) 0.0041(8)
F17 0.0503(13) 0.0701(16) 0.0891(15) 0.0405(13) -0.0547(13) -0.0314(12)
F18 0.0890(16) 0.0449(12) 0.0218(8) 0.0014(8) -0.0245(9) -0.0069(11)
F19 0.0346(10) 0.0300(9) 0.0682(12) -0.0035(9) -0.0247(9) 0.0009(8)
F20 0.0494(12) 0.0333(10) 0.0397(9) 0.0140(8) -0.0146(9) -0.0097(9)
F21 0.1038(18) 0.0274(10) 0.0473(11) -0.0098(8) -0.0411(12) 0.0081(10)
F22A 0.061(2) 0.082(2) 0.0148(11) -0.0020(12) -0.0020(11) 0.0265(16)
F23A 0.0560(19) 0.0555(18) 0.0376(13) -0.0203(12) -0.0176(12) 0.0209(14)
F24A 0.070(2) 0.115(4) 0.075(3) -0.075(3) 0.0139(19) -0.035(2)
F22B 0.065(6) 0.066(6) 0.064(6) -0.027(4) 0.001(4) -0.009(4)
F23B 0.103(15) 0.066(9) 0.027(5) -0.033(6) -0.028(7) 0.049(10)
F24B 0.058(7) 0.026(6) 0.039(6) -0.022(5) -0.023(5) 0.009(4)
B1 0.0188(12) 0.0232(13) 0.0161(11) -0.0027(10) -0.0066(9) -0.0053(10)
C1A 0.038(3) 0.026(2) 0.036(3) -0.003(2) -0.016(2) -0.003(2)
C2A 0.061(4) 0.032(3) 0.026(3) -0.002(2) 0.001(3) -0.009(3)
C3A 0.020(2) 0.042(3) 0.037(3) -0.018(2) -0.0007(19) -0.007(2)
C4A 0.043(3) 0.048(3) 0.022(2) -0.010(2) -0.004(2) -0.005(3)
C5A 0.035(3) 0.035(3) 0.044(3) 0.006(2) -0.019(3) -0.007(2)
C6A 0.047(3) 0.030(3) 0.079(3) -0.018(3) -0.0435(17) 0.004(2)
C7A 0.034(3) 0.027(3) 0.028(3) -0.003(2) -0.001(3) -0.011(3)
C8A 0.034(3) 0.022(2) 0.049(3) -0.010(2) -0.017(3) -0.006(2)
C9A 0.036(3) 0.033(4) 0.033(4) -0.017(3) -0.010(3) 0.002(3)
C10A 0.029(3) 0.045(4) 0.039(3) -0.030(3) -0.014(2) 0.004(2)
C11A 0.049(6) 0.033(5) 0.033(6) -0.004(4) -0.028(4) -0.001(4)
C12A 0.035(3) 0.039(3) 0.047(3) -0.026(3) -0.022(3) 0.001(2)
C1B 0.028(3) 0.025(3) 0.037(3) -0.015(3) -0.013(3) 0.000(2)
C2B 0.030(4) 0.050(5) 0.031(4) -0.014(3) 0.007(3) -0.012(3)
C3B 0.058(5) 0.033(4) 0.025(3) -0.003(3) -0.012(3) -0.004(3)
C4B 0.032(4) 0.034(4) 0.043(4) -0.011(3) 0.001(3) -0.007(3)
C5B 0.043(4) 0.042(4) 0.026(3) -0.011(3) -0.014(3) -0.004(3)
C6B 0.039(4) 0.046(4) 0.041(4) -0.024(4) -0.015(3) 0.008(3)
C7B 0.025(4) 0.041(6) 0.051(7) -0.028(5) 0.000(4) 0.001(4)
C8B 0.026(4) 0.045(5) 0.059(6) -0.034(5) -0.014(4) 0.001(3)
C9B 0.035(5) 0.020(4) 0.054(6) -0.014(3) 0.009(5) -0.011(4)
C10B 0.036(5) 0.030(4) 0.078(6) -0.022(4) -0.014(5) -0.012(4)
C11B 0.026(6) 0.065(12) 0.039(10) -0.022(8) -0.022(5) -0.004(6)
C12B 0.034(4) 0.056(5) 0.049(5) -0.033(4) -0.011(4) -0.009(4)
C13 0.0199(11) 0.0207(11) 0.0178(10) -0.0017(9) -0.0048(9) -0.0071(9)
C14 0.0210(11) 0.0267(13) 0.0203(11) -0.0054(9) -0.0059(9) -0.0059(10)
C15 0.0219(12) 0.0276(13) 0.0281(12) -0.0081(10) -0.0065(10) -0.0061(10)
C16 0.0236(13) 0.0315(14) 0.0285(12) -0.0114(11) 0.0001(10) -0.0074(11)
C17 0.0273(13) 0.0331(14) 0.0178(11) -0.0052(10) -0.0028(10) -0.0112(11)
C18 0.0237(12) 0.0237(12) 0.0182(10) -0.0026(9) -0.0060(9) -0.0067(9)
C19 0.0243(14) 0.0471(18) 0.0357(15) -0.0162(14) -0.0081(12) 0.0021(12)
C20 0.0349(16) 0.058(2) 0.0240(13) -0.0140(14) -0.0010(12) -0.0113(15)
C21 0.0217(11) 0.0225(11) 0.0141(9) -0.0021(8) -0.0089(8) -0.0045(9)
C22 0.0204(11) 0.0249(12) 0.0196(10) -0.0029(9) -0.0077(9) -0.0066(9)
C23 0.0284(13) 0.0282(13) 0.0232(11) -0.0018(10) -0.0109(10) -0.0112(11)
C24 0.0381(15) 0.0217(12) 0.0275(12) -0.0040(10) -0.0182(11) -0.0060(11)
C25 0.0308(13) 0.0246(12) 0.0183(10) -0.0057(9) -0.0107(10) 0.0003(10)
C26 0.0225(12) 0.0284(13) 0.0162(10) -0.0036(9) -0.0078(9) -0.0051(10)
C27 0.0368(17) 0.0321(16) 0.0481(18) -0.0005(13) -0.0166(14) -0.0178(13)
C28 0.0462(18) 0.0297(15) 0.0383(15) -0.0159(13) -0.0136(14) 0.0031(13)
C29 0.0165(10) 0.0257(12) 0.0110(9) -0.0036(8) -0.0027(8) -0.0049(9)
C30 0.0218(11) 0.0217(11) 0.0163(10) -0.0018(9) -0.0063(9) -0.0053(9)
C31 0.0220(12) 0.0260(12) 0.0181(10) -0.0038(9) -0.0048(9) -0.0085(10)
C32 0.0193(11) 0.0330(14) 0.0179(10) -0.0050(10) -0.0065(9) -0.0081(10)
C33 0.0206(11) 0.0289(13) 0.0155(10) 0.0012(9) -0.0060(9) -0.0086(10)
C34 0.0220(12) 0.0275(13) 0.0154(10) -0.0004(9) -0.0051(9) -0.0087(10)
C35 0.0346(15) 0.0304(14) 0.0301(13) -0.0028(11) -0.0137(12) -0.0124(12)
C36 0.0361(16) 0.0374(16) 0.0268(13) 0.0064(11) -0.0185(12) -0.0154(13)
C37 0.0175(10) 0.0262(12) 0.0170(10) -0.0035(9) -0.0073(8) -0.0064(9)
C38 0.0237(12) 0.0230(12) 0.0192(10) -0.0031(9) -0.0081(9) -0.0072(9)
C39 0.0253(12) 0.0260(13) 0.0235(11) 0.0025(10) -0.0132(10) -0.0074(10)
C40 0.0284(13) 0.0346(15) 0.0186(11) 0.0005(10) -0.0103(10) -0.0090(11)
C41 0.0236(12) 0.0388(15) 0.0172(11) -0.0065(10) -0.0061(9) -0.0055(11)
C42 0.0220(12) 0.0270(13) 0.0183(10) -0.0037(9) -0.0079(9) -0.0024(10)
C43 0.0375(16) 0.0275(14) 0.0303(13) 0.0016(11) -0.0153(12) -0.0070(12)
C44 0.0418(18) 0.049(2) 0.0217(13) -0.0120(13) -0.0034(12) -0.0045(15)
C45 0.107(4) 0.086(4) 0.064(3) -0.019(3) -0.043(3) 0.003(3)
C46 0.104(4) 0.051(3) 0.058(2) -0.012(2) -0.025(3) 0.013(3)
C47 0.113(4) 0.035(2) 0.079(3) -0.016(2) -0.037(3) -0.012(2)
C48 0.058(3) 0.082(3) 0.074(3) -0.045(2) -0.007(2) -0.009(2)
 
_geom_special_details
;
 All esds (except the esd in the dihedral angle between two l.s. planes)
 are estimated using the full covariance matrix.  The cell esds are taken
 into account individually in the estimation of esds in distances, angles
 and torsion angles; correlations between esds in cell parameters are only
 used when they are defined by crystal symmetry.  An approximate (isotropic)
 treatment of cell esds is used for estimating esds involving l.s. planes.
;
 
loop_
 _geom_bond_atom_site_label_1
 _geom_bond_atom_site_label_2
 _geom_bond_distance
 _geom_bond_site_symmetry_2
 _geom_bond_publ_flag
Lu1 C1A 2.328(5) . ?
Lu1 C1B 2.336(6) . ?
Lu1 N1 2.397(2) . ?
Lu1 N2 2.398(2) . ?
Lu1 N3 2.459(2) . ?
Lu1 N4 2.484(2) . ?
Lu1 Lu1 3.5147(2) 2_656 ?
Lu1 H1 2.01(3) . ?
O1 C46 1.378(5) . ?
O1 C47 1.399(4) . ?
N1 C4B 1.444(8) . ?
N1 C7A 1.448(8) . ?
N1 C1A 1.471(6) . ?
N1 C2A 1.495(6) . ?
N1 C9B 1.515(10) . ?
N1 C3B 1.548(7) . ?
N2 C1B 1.436(6) . ?
N2 C4A 1.450(5) . ?
N2 C7B 1.464(12) . ?
N2 C2B 1.478(7) . ?
N2 C3A 1.518(5) . ?
N2 C9A 1.534(9) . ?
N3 C6B 1.350(8) . ?
N3 C11B 1.37(3) . ?
N3 C5A 1.370(6) . ?
N3 C11A 1.47(2) . ?
N3 C6A 1.675(7) . ?
N3 C5B 1.754(7) . ?
N4 C10A 1.447(6) . ?
N4 C10B 1.447(9) . ?
N4 C12A 1.493(6) . ?
N4 C8B 1.508(9) . ?
N4 C8A 1.528(6) . ?
N4 C12B 1.542(8) . ?
F1 C19 1.333(3) . ?
F2 C19 1.299(4) . ?
F3 C19 1.335(4) . ?
F4A C20 1.334(7) . ?
F5A C20 1.381(7) . ?
F6A C20 1.305(6) . ?
F4B C20 1.299(11) . ?
F5B C20 1.266(9) . ?
F6B C20 1.411(10) . ?
F7 C27 1.308(4) . ?
F8 C27 1.356(4) . ?
F9 C27 1.329(4) . ?
F10 C28 1.337(3) . ?
F11 C28 1.352(4) . ?
F12 C28 1.316(3) . ?
F13 C35 1.322(3) . ?
F14 C35 1.346(4) . ?
F15 C35 1.324(3) . ?
F16 C36 1.330(4) . ?
F17 C36 1.330(3) . ?
F18 C36 1.333(3) . ?
F19 C43 1.351(3) . ?
F20 C43 1.346(3) . ?
F21 C43 1.318(3) . ?
F22A C44 1.336(4) . ?
F23A C44 1.358(4) . ?
F24A C44 1.309(4) . ?
F22B C44 1.185(15) . ?
F23B C44 1.253(13) . ?
F24B C44 1.456(10) . ?
B1 C13 1.626(4) . ?
B1 C21 1.638(4) . ?
B1 C29 1.643(3) . ?
B1 C37 1.669(3) . ?
C1A H1A 0.9900 . ?
C1A H1B 0.9900 . ?
C2A H2A 0.9800 . ?
C2A H2B 0.9800 . ?
C2A H2C 0.9800 . ?
C3A H3A 0.9800 . ?
C3A H3B 0.9800 . ?
C3A H3C 0.9800 . ?
C4A H4A 0.9800 . ?
C4A H4B 0.9800 . ?
C4A H4C 0.9800 . ?
C5A H5A 0.9800 . ?
C5A H5B 0.9800 . ?
C5A H5C 0.9800 . ?
C6A H6A 0.9800 . ?
C6A H6B 0.9800 . ?
C6A H6C 0.9800 . ?
C7A C8A 1.534(9) . ?
C7A H7A 0.9900 . ?
C7A H7B 0.9900 . ?
C8A H8A 0.9900 . ?
C8A H8B 0.9900 . ?
C9A C10A 1.517(10) . ?
C9A H9A 0.9900 . ?
C9A H9B 0.9900 . ?
C10A H10A 0.9900 . ?
C10A H10B 0.9900 . ?
C11A C12A 1.51(2) . ?
C11A H11A 0.9900 . ?
C11A H11B 0.9900 . ?
C12A H12A 0.9900 . ?
C12A H12B 0.9900 . ?
C1B H1C 0.9900 . ?
C1B H1D 0.9900 . ?
C2B H2D 0.9800 . ?
C2B H2E 0.9800 . ?
C2B H2F 0.9800 . ?
C3B H3D 0.9800 . ?
C3B H3E 0.9800 . ?
C3B H3F 0.9800 . ?
C4B H4D 0.9800 . ?
C4B H4E 0.9800 . ?
C4B H4F 0.9800 . ?
C5B H5D 0.9800 . ?
C5B H5E 0.9800 . ?
C5B H5F 0.9800 . ?
C6B H6D 0.9800 . ?
C6B H6E 0.9800 . ?
C6B H6F 0.9800 . ?
C7B C8B 1.473(15) . ?
C7B H7C 0.9900 . ?
C7B H7D 0.9900 . ?
C8B H8C 0.9900 . ?
C8B H8D 0.9900 . ?
C9B C10B 1.473(15) . ?
C9B H9C 0.9900 . ?
C9B H9D 0.9900 . ?
C10B H10C 0.9900 . ?
C10B H10D 0.9900 . ?
C11B C12B 1.44(3) . ?
C11B H11C 0.9900 . ?
C11B H11D 0.9900 . ?
C12B H12C 0.9900 . ?
C12B H12D 0.9900 . ?
C13 C14 1.398(3) . ?
C13 C18 1.409(3) . ?
C14 C15 1.383(4) . ?
C14 H14 0.9500 . ?
C15 C16 1.395(3) . ?
C15 C19 1.489(4) . ?
C16 C17 1.393(4) . ?
C16 H16 0.9500 . ?
C17 C18 1.381(4) . ?
C17 C20 1.499(4) . ?
C18 H18 0.9500 . ?
C21 C26 1.397(4) . ?
C21 C22 1.400(3) . ?
C22 C23 1.390(4) . ?
C22 H22 0.9500 . ?
C23 C24 1.382(4) . ?
C23 C27 1.502(4) . ?
C24 C25 1.386(4) . ?
C24 H24 0.9500 . ?
C25 C26 1.390(4) . ?
C25 C28 1.492(4) . ?
C26 H26 0.9500 . ?
C29 C30 1.396(3) . ?
C29 C34 1.404(3) . ?
C30 C31 1.396(3) . ?
C30 H30 0.9500 . ?
C31 C32 1.385(3) . ?
C31 C35 1.492(3) . ?
C32 C33 1.384(3) . ?
C32 H32 0.9500 . ?
C33 C34 1.391(3) . ?
C33 C36 1.501(3) . ?
C34 H34 0.9500 . ?
C37 C42 1.390(4) . ?
C37 C38 1.394(3) . ?
C38 C39 1.403(3) . ?
C38 H38 0.9500 . ?
C39 C40 1.379(4) . ?
C39 C43 1.482(4) . ?
C40 C41 1.369(4) . ?
C40 H40 0.9500 . ?
C41 C42 1.398(3) . ?
C41 C44 1.503(4) . ?
C42 H42 0.9500 . ?
C45 C46 1.455(6) . ?
C45 H45A 0.9800 . ?
C45 H45B 0.9800 . ?
C45 H45C 0.9800 . ?
C46 H46A 0.9900 . ?
C46 H46B 0.9900 . ?
C47 C48 1.452(6) . ?
C47 H47A 0.9900 . ?
C47 H47B 0.9900 . ?
C48 H48A 0.9800 . ?
C48 H48B 0.9800 . ?
C48 H48C 0.9800 . ?
 
loop_
 _geom_angle_atom_site_label_1
 _geom_angle_atom_site_label_2
 _geom_angle_atom_site_label_3
 _geom_angle
 _geom_angle_site_symmetry_1
 _geom_angle_site_symmetry_3
 _geom_angle_publ_flag
C1A Lu1 C1B 70.4(2) . . ?
C1A Lu1 N1 36.24(14) . . ?
C1B Lu1 N1 102.72(16) . . ?
C1A Lu1 N2 102.06(15) . . ?
C1B Lu1 N2 35.29(15) . . ?
N1 Lu1 N2 125.72(8) . . ?
C1A Lu1 N3 139.36(15) . . ?
C1B Lu1 N3 139.40(16) . . ?
N1 Lu1 N3 103.25(10) . . ?
N2 Lu1 N3 104.28(9) . . ?
C1A Lu1 N4 87.39(14) . . ?
C1B Lu1 N4 86.86(15) . . ?
N1 Lu1 N4 72.89(8) . . ?
N2 Lu1 N4 72.76(7) . . ?
N3 Lu1 N4 71.79(9) . . ?
C1A Lu1 Lu1 103.86(13) . 2_656 ?
C1B Lu1 Lu1 103.79(14) . 2_656 ?
N1 Lu1 Lu1 111.93(6) . 2_656 ?
N2 Lu1 Lu1 111.29(5) . 2_656 ?
N3 Lu1 Lu1 94.73(7) . 2_656 ?
N4 Lu1 Lu1 166.50(5) . 2_656 ?
C1A Lu1 H1 119.1(7) . . ?
C1B Lu1 H1 82.3(8) . . ?
N1 Lu1 H1 141.7(7) . . ?
N2 Lu1 H1 79.6(8) . . ?
N3 Lu1 H1 95.8(7) . . ?
N4 Lu1 H1 145.3(7) . . ?
Lu1 Lu1 H1 32.6(8) 2_656 . ?
C46 O1 C47 115.6(3) . . ?
C7A N1 C1A 115.1(4) . . ?
C7A N1 C2A 108.8(4) . . ?
C1A N1 C2A 114.6(4) . . ?
C4B N1 C9B 112.3(5) . . ?
C4B N1 C3B 109.0(5) . . ?
C9B N1 C3B 106.4(6) . . ?
C4B N1 Lu1 114.1(3) . . ?
C7A N1 Lu1 116.0(3) . . ?
C1A N1 Lu1 69.3(2) . . ?
C2A N1 Lu1 127.4(3) . . ?
C9B N1 Lu1 106.1(4) . . ?
C3B N1 Lu1 108.6(3) . . ?
C1B N2 C7B 116.1(5) . . ?
C1B N2 C2B 114.1(4) . . ?
C7B N2 C2B 110.5(5) . . ?
C4A N2 C3A 108.0(3) . . ?
C4A N2 C9A 111.2(4) . . ?
C3A N2 C9A 103.7(4) . . ?
C1B N2 Lu1 70.0(3) . . ?
C4A N2 Lu1 114.6(3) . . ?
C7B N2 Lu1 114.6(5) . . ?
C2B N2 Lu1 125.9(4) . . ?
C3A N2 Lu1 110.4(2) . . ?
C9A N2 Lu1 108.4(4) . . ?
C6B N3 C11B 126.2(12) . . ?
C5A N3 C11A 117.4(8) . . ?
C5A N3 C6A 101.8(4) . . ?
C11A N3 C6A 101.0(8) . . ?
C6B N3 C5B 98.3(5) . . ?
C11B N3 C5B 99.0(11) . . ?
C6B N3 Lu1 116.3(3) . . ?
C11B N3 Lu1 110.4(12) . . ?
C5A N3 Lu1 116.9(3) . . ?
C11A N3 Lu1 113.5(8) . . ?
C6A N3 Lu1 102.5(2) . . ?
C5B N3 Lu1 99.4(3) . . ?
C10A N4 C12A 110.6(3) . . ?
C10B N4 C8B 111.0(6) . . ?
C10A N4 C8A 109.5(4) . . ?
C12A N4 C8A 108.8(4) . . ?
C10B N4 C12B 113.2(5) . . ?
C8B N4 C12B 106.2(5) . . ?
C10A N4 Lu1 111.0(3) . . ?
C10B N4 Lu1 110.8(4) . . ?
C12A N4 Lu1 110.7(2) . . ?
C8B N4 Lu1 106.5(3) . . ?
C8A N4 Lu1 106.1(2) . . ?
C12B N4 Lu1 108.9(3) . . ?
C13 B1 C21 109.19(19) . . ?
C13 B1 C29 108.01(19) . . ?
C21 B1 C29 111.6(2) . . ?
C13 B1 C37 112.4(2) . . ?
C21 B1 C37 108.80(19) . . ?
C29 B1 C37 106.90(17) . . ?
N1 C1A Lu1 74.4(2) . . ?
N1 C1A H1A 116.1 . . ?
Lu1 C1A H1A 116.1 . . ?
N1 C1A H1B 116.1 . . ?
Lu1 C1A H1B 116.1 . . ?
H1A C1A H1B 113.0 . . ?
N1 C2A H2A 109.5 . . ?
N1 C2A H2B 109.5 . . ?
N1 C2A H2C 109.5 . . ?
N2 C3A H3A 109.5 . . ?
N2 C3A H3B 109.5 . . ?
N2 C3A H3C 109.5 . . ?
N2 C4A H4A 109.5 . . ?
N2 C4A H4B 109.5 . . ?
N2 C4A H4C 109.5 . . ?
N3 C5A H5A 109.5 . . ?
N3 C5A H5B 109.5 . . ?
N3 C5A H5C 109.5 . . ?
N3 C6A H6A 109.5 . . ?
N3 C6A H6B 109.5 . . ?
N3 C6A H6C 109.5 . . ?
N1 C7A C8A 112.5(5) . . ?
N1 C7A H7A 109.1 . . ?
C8A C7A H7A 109.1 . . ?
N1 C7A H7B 109.1 . . ?
C8A C7A H7B 109.1 . . ?
H7A C7A H7B 107.8 . . ?
N4 C8A C7A 112.1(5) . . ?
N4 C8A H8A 109.2 . . ?
C7A C8A H8A 109.2 . . ?
N4 C8A H8B 109.2 . . ?
C7A C8A H8B 109.2 . . ?
H8A C8A H8B 107.9 . . ?
C10A C9A N2 109.0(6) . . ?
C10A C9A H9A 109.9 . . ?
N2 C9A H9A 109.9 . . ?
C10A C9A H9B 109.9 . . ?
N2 C9A H9B 109.9 . . ?
H9A C9A H9B 108.3 . . ?
N4 C10A C9A 111.4(5) . . ?
N4 C10A H10A 109.3 . . ?
C9A C10A H10A 109.3 . . ?
N4 C10A H10B 109.3 . . ?
C9A C10A H10B 109.3 . . ?
H10A C10A H10B 108.0 . . ?
N3 C11A C12A 114.0(13) . . ?
N3 C11A H11A 108.7 . . ?
C12A C11A H11A 108.7 . . ?
N3 C11A H11B 108.7 . . ?
C12A C11A H11B 108.7 . . ?
H11A C11A H11B 107.6 . . ?
N4 C12A C11A 112.4(8) . . ?
N4 C12A H12A 109.1 . . ?
C11A C12A H12A 109.1 . . ?
N4 C12A H12B 109.1 . . ?
C11A C12A H12B 109.1 . . ?
H12A C12A H12B 107.9 . . ?
N2 C1B Lu1 74.7(3) . . ?
N2 C1B H1C 116.0 . . ?
Lu1 C1B H1C 116.0 . . ?
N2 C1B H1D 116.0 . . ?
Lu1 C1B H1D 116.0 . . ?
H1C C1B H1D 113.0 . . ?
N2 C2B H2D 109.5 . . ?
N2 C2B H2E 109.5 . . ?
H2D C2B H2E 109.5 . . ?
N2 C2B H2F 109.5 . . ?
H2D C2B H2F 109.5 . . ?
H2E C2B H2F 109.5 . . ?
N1 C3B H3D 109.5 . . ?
N1 C3B H3E 109.5 . . ?
H3D C3B H3E 109.5 . . ?
N1 C3B H3F 109.5 . . ?
H3D C3B H3F 109.5 . . ?
H3E C3B H3F 109.5 . . ?
N1 C4B H4D 109.5 . . ?
N1 C4B H4E 109.5 . . ?
H4D C4B H4E 109.5 . . ?
N1 C4B H4F 109.5 . . ?
H4D C4B H4F 109.5 . . ?
H4E C4B H4F 109.5 . . ?
N3 C5B H5D 109.5 . . ?
N3 C5B H5E 109.5 . . ?
H5D C5B H5E 109.5 . . ?
N3 C5B H5F 109.5 . . ?
H5D C5B H5F 109.5 . . ?
H5E C5B H5F 109.5 . . ?
N3 C6B H6D 109.5 . . ?
N3 C6B H6E 109.5 . . ?
H6D C6B H6E 109.5 . . ?
N3 C6B H6F 109.5 . . ?
H6D C6B H6F 109.5 . . ?
H6E C6B H6F 109.5 . . ?
N2 C7B C8B 113.7(8) . . ?
N2 C7B H7C 108.8 . . ?
C8B C7B H7C 108.8 . . ?
N2 C7B H7D 108.8 . . ?
C8B C7B H7D 108.8 . . ?
H7C C7B H7D 107.7 . . ?
C7B C8B N4 113.9(7) . . ?
C7B C8B H8C 108.8 . . ?
N4 C8B H8C 108.8 . . ?
C7B C8B H8D 108.8 . . ?
N4 C8B H8D 108.8 . . ?
H8C C8B H8D 107.7 . . ?
C10B C9B N1 112.3(8) . . ?
C10B C9B H9C 109.1 . . ?
N1 C9B H9C 109.1 . . ?
C10B C9B H9D 109.1 . . ?
N1 C9B H9D 109.1 . . ?
H9C C9B H9D 107.9 . . ?
N4 C10B C9B 110.2(6) . . ?
N4 C10B H10C 109.6 . . ?
C9B C10B H10C 109.6 . . ?
N4 C10B H10D 109.6 . . ?
C9B C10B H10D 109.6 . . ?
H10C C10B H10D 108.1 . . ?
N3 C11B C12B 123.0(17) . . ?
N3 C11B H11C 106.6 . . ?
C12B C11B H11C 106.6 . . ?
N3 C11B H11D 106.6 . . ?
C12B C11B H11D 106.6 . . ?
H11C C11B H11D 106.5 . . ?
C11B C12B N4 108.1(12) . . ?
C11B C12B H12C 110.1 . . ?
N4 C12B H12C 110.1 . . ?
C11B C12B H12D 110.1 . . ?
N4 C12B H12D 110.1 . . ?
H12C C12B H12D 108.4 . . ?
C14 C13 C18 114.5(2) . . ?
C14 C13 B1 123.4(2) . . ?
C18 C13 B1 121.8(2) . . ?
C15 C14 C13 123.4(2) . . ?
C15 C14 H14 118.3 . . ?
C13 C14 H14 118.3 . . ?
C14 C15 C16 121.0(2) . . ?
C14 C15 C19 119.0(2) . . ?
C16 C15 C19 120.0(3) . . ?
C17 C16 C15 116.9(3) . . ?
C17 C16 H16 121.6 . . ?
C15 C16 H16 121.6 . . ?
C18 C17 C16 121.5(2) . . ?
C18 C17 C20 119.6(2) . . ?
C16 C17 C20 118.8(3) . . ?
C17 C18 C13 122.7(2) . . ?
C17 C18 H18 118.6 . . ?
C13 C18 H18 118.6 . . ?
F2 C19 F1 107.4(3) . . ?
F2 C19 F3 106.3(3) . . ?
F1 C19 F3 103.2(2) . . ?
F2 C19 C15 115.1(2) . . ?
F1 C19 C15 112.2(2) . . ?
F3 C19 C15 111.8(3) . . ?
F5B C20 F4B 107.1(6) . . ?
F6A C20 F4A 107.2(4) . . ?
F6A C20 F5A 104.7(4) . . ?
F4A C20 F5A 106.1(4) . . ?
F5B C20 F6B 103.6(5) . . ?
F4B C20 F6B 108.6(6) . . ?
F5B C20 C17 115.2(5) . . ?
F4B C20 C17 112.2(5) . . ?
F6A C20 C17 113.0(4) . . ?
F4A C20 C17 113.8(3) . . ?
F5A C20 C17 111.4(4) . . ?
F6B C20 C17 109.6(5) . . ?
C26 C21 C22 114.8(2) . . ?
C26 C21 B1 121.8(2) . . ?
C22 C21 B1 123.3(2) . . ?
C23 C22 C21 122.4(3) . . ?
C23 C22 H22 118.8 . . ?
C21 C22 H22 118.8 . . ?
C24 C23 C22 121.4(2) . . ?
C24 C23 C27 119.8(3) . . ?
C22 C23 C27 118.7(3) . . ?
C23 C24 C25 117.5(2) . . ?
C23 C24 H24 121.3 . . ?
C25 C24 H24 121.3 . . ?
C24 C25 C26 120.7(3) . . ?
C24 C25 C28 121.1(3) . . ?
C26 C25 C28 118.2(2) . . ?
C25 C26 C21 123.1(2) . . ?
C25 C26 H26 118.4 . . ?
C21 C26 H26 118.4 . . ?
F7 C27 F9 107.7(3) . . ?
F7 C27 F8 104.2(3) . . ?
F9 C27 F8 104.9(2) . . ?
F7 C27 C23 114.4(2) . . ?
F9 C27 C23 112.8(3) . . ?
F8 C27 C23 112.1(2) . . ?
F12 C28 F10 107.6(3) . . ?
F12 C28 F11 105.7(2) . . ?
F10 C28 F11 104.0(3) . . ?
F12 C28 C25 114.2(3) . . ?
F10 C28 C25 112.9(2) . . ?
F11 C28 C25 111.7(2) . . ?
C30 C29 C34 115.93(19) . . ?
C30 C29 B1 121.5(2) . . ?
C34 C29 B1 122.2(2) . . ?
C29 C30 C31 122.2(2) . . ?
C29 C30 H30 118.9 . . ?
C31 C30 H30 118.9 . . ?
C32 C31 C30 120.8(2) . . ?
C32 C31 C35 118.9(2) . . ?
C30 C31 C35 120.2(2) . . ?
C33 C32 C31 117.9(2) . . ?
C33 C32 H32 121.0 . . ?
C31 C32 H32 121.0 . . ?
C32 C33 C34 121.3(2) . . ?
C32 C33 C36 119.5(2) . . ?
C34 C33 C36 119.2(2) . . ?
C33 C34 C29 121.8(2) . . ?
C33 C34 H34 119.1 . . ?
C29 C34 H34 119.1 . . ?
F13 C35 F15 107.1(2) . . ?
F13 C35 F14 104.5(2) . . ?
F15 C35 F14 105.9(2) . . ?
F13 C35 C31 113.8(2) . . ?
F15 C35 C31 113.4(2) . . ?
F14 C35 C31 111.4(2) . . ?
F16 C36 F17 106.5(3) . . ?
F16 C36 F18 105.3(2) . . ?
F17 C36 F18 107.4(2) . . ?
F16 C36 C33 113.0(2) . . ?
F17 C36 C33 112.3(2) . . ?
F18 C36 C33 111.9(3) . . ?
C42 C37 C38 116.0(2) . . ?
C42 C37 B1 121.0(2) . . ?
C38 C37 B1 122.9(2) . . ?
C37 C38 C39 121.6(2) . . ?
C37 C38 H38 119.2 . . ?
C39 C38 H38 119.2 . . ?
C40 C39 C38 120.9(2) . . ?
C40 C39 C43 119.3(2) . . ?
C38 C39 C43 119.6(3) . . ?
C41 C40 C39 118.3(2) . . ?
C41 C40 H40 120.9 . . ?
C39 C40 H40 120.9 . . ?
C40 C41 C42 120.9(3) . . ?
C40 C41 C44 120.8(2) . . ?
C42 C41 C44 118.3(3) . . ?
C37 C42 C41 122.3(2) . . ?
C37 C42 H42 118.9 . . ?
C41 C42 H42 118.9 . . ?
F21 C43 F20 106.5(2) . . ?
F21 C43 F19 106.4(3) . . ?
F20 C43 F19 104.8(2) . . ?
F21 C43 C39 114.1(2) . . ?
F20 C43 C39 112.7(3) . . ?
F19 C43 C39 111.8(2) . . ?
F22B C44 F23B 113.8(12) . . ?
F24A C44 F22A 109.1(3) . . ?
F24A C44 F23A 105.2(4) . . ?
F22A C44 F23A 103.8(3) . . ?
F22B C44 F24B 99.1(9) . . ?
F23B C44 F24B 101.6(9) . . ?
F22B C44 C41 118.0(8) . . ?
F23B C44 C41 116.5(5) . . ?
F24A C44 C41 113.7(3) . . ?
F22A C44 C41 112.5(3) . . ?
F23A C44 C41 111.8(2) . . ?
F24B C44 C41 103.9(5) . . ?
C46 C45 H45A 109.5 . . ?
C46 C45 H45B 109.5 . . ?
H45A C45 H45B 109.5 . . ?
C46 C45 H45C 109.5 . . ?
H45A C45 H45C 109.5 . . ?
H45B C45 H45C 109.5 . . ?
O1 C46 C45 112.9(4) . . ?
O1 C46 H46A 109.0 . . ?
C45 C46 H46A 109.0 . . ?
O1 C46 H46B 109.0 . . ?
C45 C46 H46B 109.0 . . ?
H46A C46 H46B 107.8 . . ?
O1 C47 C48 111.6(3) . . ?
O1 C47 H47A 109.3 . . ?
C48 C47 H47A 109.3 . . ?
O1 C47 H47B 109.3 . . ?
C48 C47 H47B 109.3 . . ?
H47A C47 H47B 108.0 . . ?
C47 C48 H48A 109.5 . . ?
C47 C48 H48B 109.5 . . ?
H48A C48 H48B 109.5 . . ?
C47 C48 H48C 109.5 . . ?
H48A C48 H48C 109.5 . . ?
H48B C48 H48C 109.5 . . ?
 
loop_
 _geom_torsion_atom_site_label_1
 _geom_torsion_atom_site_label_2
 _geom_torsion_atom_site_label_3
 _geom_torsion_atom_site_label_4
 _geom_torsion
 _geom_torsion_site_symmetry_1
 _geom_torsion_site_symmetry_2
 _geom_torsion_site_symmetry_3
 _geom_torsion_site_symmetry_4
 _geom_torsion_publ_flag
C1A Lu1 N1 C4B -148.8(5) . . . . ?
C1B Lu1 N1 C4B -176.0(4) . . . . ?
N2 Lu1 N1 C4B 154.3(4) . . . . ?
N3 Lu1 N1 C4B 35.5(4) . . . . ?
N4 Lu1 N1 C4B 101.4(4) . . . . ?
Lu1 Lu1 N1 C4B -65.2(4) 2_656 . . . ?
C1A Lu1 N1 C7A 108.7(4) . . . . ?
C1B Lu1 N1 C7A 81.5(4) . . . . ?
N2 Lu1 N1 C7A 51.7(4) . . . . ?
N3 Lu1 N1 C7A -67.0(4) . . . . ?
N4 Lu1 N1 C7A -1.1(4) . . . . ?
Lu1 Lu1 N1 C7A -167.8(3) 2_656 . . . ?
C1B Lu1 N1 C1A -27.2(3) . . . . ?
N2 Lu1 N1 C1A -56.9(3) . . . . ?
N3 Lu1 N1 C1A -175.7(3) . . . . ?
N4 Lu1 N1 C1A -109.8(3) . . . . ?
Lu1 Lu1 N1 C1A 83.5(3) 2_656 . . . ?
C1A Lu1 N1 C2A -105.8(5) . . . . ?
C1B Lu1 N1 C2A -133.0(4) . . . . ?
N2 Lu1 N1 C2A -162.7(4) . . . . ?
N3 Lu1 N1 C2A 78.5(4) . . . . ?
N4 Lu1 N1 C2A 144.4(4) . . . . ?
Lu1 Lu1 N1 C2A -22.2(4) 2_656 . . . ?
C1A Lu1 N1 C9B 87.1(5) . . . . ?
C1B Lu1 N1 C9B 59.9(5) . . . . ?
N2 Lu1 N1 C9B 30.1(5) . . . . ?
N3 Lu1 N1 C9B -88.6(5) . . . . ?
N4 Lu1 N1 C9B -22.8(4) . . . . ?
Lu1 Lu1 N1 C9B 170.6(4) 2_656 . . . ?
C1A Lu1 N1 C3B -27.0(4) . . . . ?
C1B Lu1 N1 C3B -54.2(4) . . . . ?
N2 Lu1 N1 C3B -83.9(4) . . . . ?
N3 Lu1 N1 C3B 157.3(3) . . . . ?
N4 Lu1 N1 C3B -136.8(4) . . . . ?
Lu1 Lu1 N1 C3B 56.6(4) 2_656 . . . ?
C1A Lu1 N2 C1B 26.4(3) . . . . ?
N1 Lu1 N2 C1B 56.9(3) . . . . ?
N3 Lu1 N2 C1B 175.2(3) . . . . ?
N4 Lu1 N2 C1B 109.8(3) . . . . ?
Lu1 Lu1 N2 C1B -83.8(3) 2_656 . . . ?
C1A Lu1 N2 C4A 174.8(3) . . . . ?
C1B Lu1 N2 C4A 148.3(4) . . . . ?
N1 Lu1 N2 C4A -154.8(3) . . . . ?
N3 Lu1 N2 C4A -36.5(3) . . . . ?
N4 Lu1 N2 C4A -101.9(3) . . . . ?
Lu1 Lu1 N2 C4A 64.5(3) 2_656 . . . ?
C1A Lu1 N2 C7B -83.9(5) . . . . ?
C1B Lu1 N2 C7B -110.4(5) . . . . ?
N1 Lu1 N2 C7B -53.5(5) . . . . ?
N3 Lu1 N2 C7B 64.8(5) . . . . ?
N4 Lu1 N2 C7B -0.6(4) . . . . ?
Lu1 Lu1 N2 C7B 165.8(4) 2_656 . . . ?
C1A Lu1 N2 C2B 132.3(4) . . . . ?
C1B Lu1 N2 C2B 105.8(5) . . . . ?
N1 Lu1 N2 C2B 162.7(4) . . . . ?
N3 Lu1 N2 C2B -79.0(4) . . . . ?
N4 Lu1 N2 C2B -144.3(4) . . . . ?
Lu1 Lu1 N2 C2B 22.0(4) 2_656 . . . ?
C1A Lu1 N2 C3A 52.6(3) . . . . ?
C1B Lu1 N2 C3A 26.1(3) . . . . ?
N1 Lu1 N2 C3A 83.0(3) . . . . ?
N3 Lu1 N2 C3A -158.7(3) . . . . ?
N4 Lu1 N2 C3A 136.0(3) . . . . ?
Lu1 Lu1 N2 C3A -57.7(3) 2_656 . . . ?
C1A Lu1 N2 C9A -60.4(3) . . . . ?
C1B Lu1 N2 C9A -86.8(4) . . . . ?
N1 Lu1 N2 C9A -29.9(3) . . . . ?
N3 Lu1 N2 C9A 88.4(3) . . . . ?
N4 Lu1 N2 C9A 23.0(3) . . . . ?
Lu1 Lu1 N2 C9A -170.6(3) 2_656 . . . ?
C1A Lu1 N3 C6B -92.6(5) . . . . ?
C1B Lu1 N3 C6B 142.8(5) . . . . ?
N1 Lu1 N3 C6B -88.7(5) . . . . ?
N2 Lu1 N3 C6B 138.5(5) . . . . ?
N4 Lu1 N3 C6B -155.4(5) . . . . ?
Lu1 Lu1 N3 C6B 25.2(5) 2_656 . . . ?
C1A Lu1 N3 C11B 59.9(12) . . . . ?
C1B Lu1 N3 C11B -64.7(12) . . . . ?
N1 Lu1 N3 C11B 63.8(12) . . . . ?
N2 Lu1 N3 C11B -68.9(12) . . . . ?
N4 Lu1 N3 C11B -2.9(12) . . . . ?
Lu1 Lu1 N3 C11B 177.7(12) 2_656 . . . ?
C1A Lu1 N3 C5A -149.0(4) . . . . ?
C1B Lu1 N3 C5A 86.3(4) . . . . ?
N1 Lu1 N3 C5A -145.2(4) . . . . ?
N2 Lu1 N3 C5A 82.1(4) . . . . ?
N4 Lu1 N3 C5A 148.1(4) . . . . ?
Lu1 Lu1 N3 C5A -31.3(4) 2_656 . . . ?
C1A Lu1 N3 C11A 69.4(9) . . . . ?
C1B Lu1 N3 C11A -55.2(9) . . . . ?
N1 Lu1 N3 C11A 73.3(9) . . . . ?
N2 Lu1 N3 C11A -59.5(9) . . . . ?
N4 Lu1 N3 C11A 6.6(9) . . . . ?
Lu1 Lu1 N3 C11A -172.9(9) 2_656 . . . ?
C1A Lu1 N3 C6A -38.7(3) . . . . ?
C1B Lu1 N3 C6A -163.3(3) . . . . ?
N1 Lu1 N3 C6A -34.8(2) . . . . ?
N2 Lu1 N3 C6A -167.6(2) . . . . ?
N4 Lu1 N3 C6A -101.5(2) . . . . ?
Lu1 Lu1 N3 C6A 79.1(2) 2_656 . . . ?
C1A Lu1 N3 C5B 163.3(3) . . . . ?
C1B Lu1 N3 C5B 38.6(4) . . . . ?
N1 Lu1 N3 C5B 167.1(3) . . . . ?
N2 Lu1 N3 C5B 34.4(3) . . . . ?
N4 Lu1 N3 C5B 100.5(3) . . . . ?
Lu1 Lu1 N3 C5B -79.0(3) 2_656 . . . ?
C1A Lu1 N4 C10A 110.0(3) . . . . ?
C1B Lu1 N4 C10A 39.5(3) . . . . ?
N1 Lu1 N4 C10A 143.8(3) . . . . ?
N2 Lu1 N4 C10A 6.5(3) . . . . ?
N3 Lu1 N4 C10A -105.5(3) . . . . ?
Lu1 Lu1 N4 C10A -103.1(4) 2_656 . . . ?
C1A Lu1 N4 C10B -39.4(5) . . . . ?
C1B Lu1 N4 C10B -109.9(5) . . . . ?
N1 Lu1 N4 C10B -5.6(4) . . . . ?
N2 Lu1 N4 C10B -142.9(5) . . . . ?
N3 Lu1 N4 C10B 105.2(5) . . . . ?
Lu1 Lu1 N4 C10B 107.5(5) 2_656 . . . ?
C1A Lu1 N4 C12A -126.7(3) . . . . ?
C1B Lu1 N4 C12A 162.7(3) . . . . ?
N1 Lu1 N4 C12A -92.9(3) . . . . ?
N2 Lu1 N4 C12A 129.8(3) . . . . ?
N3 Lu1 N4 C12A 17.8(3) . . . . ?
Lu1 Lu1 N4 C12A 20.1(4) 2_656 . . . ?
C1A Lu1 N4 C8B 81.4(4) . . . . ?
C1B Lu1 N4 C8B 10.9(4) . . . . ?
N1 Lu1 N4 C8B 115.2(4) . . . . ?
N2 Lu1 N4 C8B -22.1(4) . . . . ?
N3 Lu1 N4 C8B -134.1(4) . . . . ?
Lu1 Lu1 N4 C8B -131.7(4) 2_656 . . . ?
C1A Lu1 N4 C8A -8.8(3) . . . . ?
C1B Lu1 N4 C8A -79.4(3) . . . . ?
N1 Lu1 N4 C8A 25.0(3) . . . . ?
N2 Lu1 N4 C8A -112.3(3) . . . . ?
N3 Lu1 N4 C8A 135.7(3) . . . . ?
Lu1 Lu1 N4 C8A 138.0(3) 2_656 . . . ?
C1A Lu1 N4 C12B -164.5(4) . . . . ?
C1B Lu1 N4 C12B 125.0(4) . . . . ?
N1 Lu1 N4 C12B -130.6(4) . . . . ?
N2 Lu1 N4 C12B 92.1(4) . . . . ?
N3 Lu1 N4 C12B -19.9(4) . . . . ?
Lu1 Lu1 N4 C12B -17.6(5) 2_656 . . . ?
C4B N1 C1A Lu1 102.6(8) . . . . ?
C7A N1 C1A Lu1 -110.0(4) . . . . ?
C2A N1 C1A Lu1 122.7(3) . . . . ?
C9B N1 C1A Lu1 -106.1(5) . . . . ?
C3B N1 C1A Lu1 144.2(5) . . . . ?
C1B Lu1 C1A N1 151.8(3) . . . . ?
N2 Lu1 C1A N1 135.9(2) . . . . ?
N3 Lu1 C1A N1 6.4(4) . . . . ?
N4 Lu1 C1A N1 64.2(2) . . . . ?
Lu1 Lu1 C1A N1 -108.3(2) 2_656 . . . ?
C4B N1 C7A C8A -140.8(6) . . . . ?
C1A N1 C7A C8A 54.3(7) . . . . ?
C2A N1 C7A C8A -175.5(5) . . . . ?
C9B N1 C7A C8A 44.2(15) . . . . ?
C3B N1 C7A C8A 107.6(6) . . . . ?
Lu1 N1 C7A C8A -23.8(7) . . . . ?
C10A N4 C8A C7A -166.8(5) . . . . ?
C10B N4 C8A C7A 56.9(10) . . . . ?
C12A N4 C8A C7A 72.2(5) . . . . ?
C8B N4 C8A C7A -153.0(6) . . . . ?
C12B N4 C8A C7A 97.6(7) . . . . ?
Lu1 N4 C8A C7A -47.0(5) . . . . ?
N1 C7A C8A N4 49.1(7) . . . . ?
C1B N2 C9A C10A -120.4(5) . . . . ?
C4A N2 C9A C10A 76.4(6) . . . . ?
C7B N2 C9A C10A 59.6(16) . . . . ?
C2B N2 C9A C10A 117.1(7) . . . . ?
C3A N2 C9A C10A -167.8(5) . . . . ?
Lu1 N2 C9A C10A -50.4(5) . . . . ?
C10B N4 C10A C9A 106.3(7) . . . . ?
C12A N4 C10A C9A -159.4(5) . . . . ?
C8B N4 C10A C9A 49.5(9) . . . . ?
C8A N4 C10A C9A 80.7(6) . . . . ?
C12B N4 C10A C9A -142.4(6) . . . . ?
Lu1 N4 C10A C9A -36.1(6) . . . . ?
N2 C9A C10A N4 59.2(7) . . . . ?
C6B N3 C11A C12A 128.9(12) . . . . ?
C11B N3 C11A C12A 42(11) . . . . ?
C5A N3 C11A C12A -172.1(9) . . . . ?
C6A N3 C11A C12A 78.2(14) . . . . ?
C5B N3 C11A C12A -130.9(13) . . . . ?
Lu1 N3 C11A C12A -30.7(16) . . . . ?
C10A N4 C12A C11A 83.1(10) . . . . ?
C10B N4 C12A C11A -149.1(11) . . . . ?
C8B N4 C12A C11A 101.0(11) . . . . ?
C8A N4 C12A C11A -156.6(10) . . . . ?
C12B N4 C12A C11A 53.4(11) . . . . ?
Lu1 N4 C12A C11A -40.4(10) . . . . ?
N3 C11A C12A N4 48.5(16) . . . . ?
C4A N2 C1B Lu1 -104.7(8) . . . . ?
C7B N2 C1B Lu1 108.4(5) . . . . ?
C2B N2 C1B Lu1 -121.3(4) . . . . ?
C3A N2 C1B Lu1 -146.2(4) . . . . ?
C9A N2 C1B Lu1 108.4(4) . . . . ?
C1A Lu1 C1B N2 -152.5(3) . . . . ?
N1 Lu1 C1B N2 -135.8(2) . . . . ?
N3 Lu1 C1B N2 -7.1(4) . . . . ?
N4 Lu1 C1B N2 -64.1(2) . . . . ?
Lu1 Lu1 C1B N2 107.5(2) 2_656 . . . ?
C1B N2 C7B C8B -53.9(10) . . . . ?
C4A N2 C7B C8B 141.7(8) . . . . ?
C2B N2 C7B C8B 174.1(7) . . . . ?
C3A N2 C7B C8B -108.1(8) . . . . ?
C9A N2 C7B C8B -53.8(16) . . . . ?
Lu1 N2 C7B C8B 24.8(9) . . . . ?
N2 C7B C8B N4 -48.3(10) . . . . ?
C10A N4 C8B C7B -59.3(11) . . . . ?
C10B N4 C8B C7B 165.2(8) . . . . ?
C12A N4 C8B C7B -97.9(8) . . . . ?
C8A N4 C8B C7B 150.0(8) . . . . ?
C12B N4 C8B C7B -71.4(8) . . . . ?
Lu1 N4 C8B C7B 44.5(8) . . . . ?
C4B N1 C9B C10B -73.1(8) . . . . ?
C7A N1 C9B C10B -67.8(17) . . . . ?
C1A N1 C9B C10B 121.4(7) . . . . ?
C2A N1 C9B C10B -115.4(8) . . . . ?
C3B N1 C9B C10B 167.6(6) . . . . ?
Lu1 N1 C9B C10B 52.1(7) . . . . ?
C10A N4 C10B C9B -108.0(7) . . . . ?
C12A N4 C10B C9B 143.2(8) . . . . ?
C8B N4 C10B C9B -83.6(8) . . . . ?
C8A N4 C10B C9B -51.4(8) . . . . ?
C12B N4 C10B C9B 157.1(7) . . . . ?
Lu1 N4 C10B C9B 34.5(8) . . . . ?
N1 C9B C10B N4 -60.2(9) . . . . ?
C6B N3 C11B C12B 179.9(14) . . . . ?
C5A N3 C11B C12B -117.5(19) . . . . ?
C11A N3 C11B C12B -80(12) . . . . ?
C6A N3 C11B C12B 135(2) . . . . ?
C5B N3 C11B C12B -73(2) . . . . ?
Lu1 N3 C11B C12B 31(2) . . . . ?
N3 C11B C12B N4 -50(2) . . . . ?
C10A N4 C12B C11B 148.4(12) . . . . ?
C10B N4 C12B C11B -84.0(12) . . . . ?
C12A N4 C12B C11B -59.8(12) . . . . ?
C8B N4 C12B C11B 154.0(11) . . . . ?
C8A N4 C12B C11B -104.3(12) . . . . ?
Lu1 N4 C12B C11B 39.7(12) . . . . ?
C21 B1 C13 C14 83.7(3) . . . . ?
C29 B1 C13 C14 -154.9(2) . . . . ?
C37 B1 C13 C14 -37.2(3) . . . . ?
C21 B1 C13 C18 -90.4(2) . . . . ?
C29 B1 C13 C18 31.0(3) . . . . ?
C37 B1 C13 C18 148.7(2) . . . . ?
C18 C13 C14 C15 -2.6(3) . . . . ?
B1 C13 C14 C15 -177.1(2) . . . . ?
C13 C14 C15 C16 2.4(4) . . . . ?
C13 C14 C15 C19 -179.2(2) . . . . ?
C14 C15 C16 C17 -0.7(4) . . . . ?
C19 C15 C16 C17 -179.1(3) . . . . ?
C15 C16 C17 C18 -0.7(4) . . . . ?
C15 C16 C17 C20 177.7(3) . . . . ?
C16 C17 C18 C13 0.4(4) . . . . ?
C20 C17 C18 C13 -178.0(2) . . . . ?
C14 C13 C18 C17 1.2(3) . . . . ?
B1 C13 C18 C17 175.8(2) . . . . ?
C14 C15 C19 F2 178.7(3) . . . . ?
C16 C15 C19 F2 -2.9(4) . . . . ?
C14 C15 C19 F1 55.4(4) . . . . ?
C16 C15 C19 F1 -126.2(3) . . . . ?
C14 C15 C19 F3 -60.0(3) . . . . ?
C16 C15 C19 F3 118.4(3) . . . . ?
C18 C17 C20 F5B -174.9(9) . . . . ?
C16 C17 C20 F5B 6.7(9) . . . . ?
C18 C17 C20 F4B -51.9(9) . . . . ?
C16 C17 C20 F4B 129.6(8) . . . . ?
C18 C17 C20 F6A 96.6(7) . . . . ?
C16 C17 C20 F6A -81.8(7) . . . . ?
C18 C17 C20 F4A -25.9(6) . . . . ?
C16 C17 C20 F4A 155.7(6) . . . . ?
C18 C17 C20 F5A -145.8(5) . . . . ?
C16 C17 C20 F5A 35.8(6) . . . . ?
C18 C17 C20 F6B 68.9(8) . . . . ?
C16 C17 C20 F6B -109.6(7) . . . . ?
C13 B1 C21 C26 163.97(19) . . . . ?
C29 B1 C21 C26 44.7(3) . . . . ?
C37 B1 C21 C26 -73.0(3) . . . . ?
C13 B1 C21 C22 -18.4(3) . . . . ?
C29 B1 C21 C22 -137.7(2) . . . . ?
C37 B1 C21 C22 104.6(2) . . . . ?
C26 C21 C22 C23 1.5(3) . . . . ?
B1 C21 C22 C23 -176.3(2) . . . . ?
C21 C22 C23 C24 0.2(4) . . . . ?
C21 C22 C23 C27 -179.2(2) . . . . ?
C22 C23 C24 C25 -0.8(3) . . . . ?
C27 C23 C24 C25 178.6(2) . . . . ?
C23 C24 C25 C26 -0.3(3) . . . . ?
C23 C24 C25 C28 -178.9(2) . . . . ?
C24 C25 C26 C21 2.1(3) . . . . ?
C28 C25 C26 C21 -179.3(2) . . . . ?
C22 C21 C26 C25 -2.6(3) . . . . ?
B1 C21 C26 C25 175.2(2) . . . . ?
C24 C23 C27 F7 -103.3(3) . . . . ?
C22 C23 C27 F7 76.1(3) . . . . ?
C24 C23 C27 F9 20.2(4) . . . . ?
C22 C23 C27 F9 -160.4(2) . . . . ?
C24 C23 C27 F8 138.4(3) . . . . ?
C22 C23 C27 F8 -42.3(3) . . . . ?
C24 C25 C28 F12 -12.7(4) . . . . ?
C26 C25 C28 F12 168.7(2) . . . . ?
C24 C25 C28 F10 110.7(3) . . . . ?
C26 C25 C28 F10 -67.9(3) . . . . ?
C24 C25 C28 F11 -132.5(3) . . . . ?
C26 C25 C28 F11 48.9(3) . . . . ?
C13 B1 C29 C30 79.4(3) . . . . ?
C21 B1 C29 C30 -160.6(2) . . . . ?
C37 B1 C29 C30 -41.8(3) . . . . ?
C13 B1 C29 C34 -93.5(3) . . . . ?
C21 B1 C29 C34 26.5(3) . . . . ?
C37 B1 C29 C34 145.4(2) . . . . ?
C34 C29 C30 C31 0.6(4) . . . . ?
B1 C29 C30 C31 -172.7(2) . . . . ?
C29 C30 C31 C32 -0.5(4) . . . . ?
C29 C30 C31 C35 -176.8(2) . . . . ?
C30 C31 C32 C33 -0.6(4) . . . . ?
C35 C31 C32 C33 175.8(3) . . . . ?
C31 C32 C33 C34 1.5(4) . . . . ?
C31 C32 C33 C36 179.1(3) . . . . ?
C32 C33 C34 C29 -1.5(4) . . . . ?
C36 C33 C34 C29 -179.1(3) . . . . ?
C30 C29 C34 C33 0.4(4) . . . . ?
B1 C29 C34 C33 173.6(2) . . . . ?
C32 C31 C35 F13 155.5(2) . . . . ?
C30 C31 C35 F13 -28.2(4) . . . . ?
C32 C31 C35 F15 32.7(4) . . . . ?
C30 C31 C35 F15 -151.0(3) . . . . ?
C32 C31 C35 F14 -86.7(3) . . . . ?
C30 C31 C35 F14 89.6(3) . . . . ?
C32 C33 C36 F16 146.6(3) . . . . ?
C34 C33 C36 F16 -35.8(4) . . . . ?
C32 C33 C36 F17 26.0(4) . . . . ?
C34 C33 C36 F17 -156.4(3) . . . . ?
C32 C33 C36 F18 -94.8(3) . . . . ?
C34 C33 C36 F18 82.9(3) . . . . ?
C13 B1 C37 C42 159.1(2) . . . . ?
C21 B1 C37 C42 38.0(3) . . . . ?
C29 B1 C37 C42 -82.6(3) . . . . ?
C13 B1 C37 C38 -24.7(3) . . . . ?
C21 B1 C37 C38 -145.8(2) . . . . ?
C29 B1 C37 C38 93.6(3) . . . . ?
C42 C37 C38 C39 -1.5(3) . . . . ?
B1 C37 C38 C39 -177.9(2) . . . . ?
C37 C38 C39 C40 1.7(3) . . . . ?
C37 C38 C39 C43 -174.1(2) . . . . ?
C38 C39 C40 C41 -0.3(4) . . . . ?
C43 C39 C40 C41 175.6(2) . . . . ?
C39 C40 C41 C42 -1.2(4) . . . . ?
C39 C40 C41 C44 -179.9(2) . . . . ?
C38 C37 C42 C41 0.0(3) . . . . ?
B1 C37 C42 C41 176.5(2) . . . . ?
C40 C41 C42 C37 1.4(4) . . . . ?
C44 C41 C42 C37 -179.9(2) . . . . ?
C40 C39 C43 F21 154.9(3) . . . . ?
C38 C39 C43 F21 -29.1(3) . . . . ?
C40 C39 C43 F20 33.3(3) . . . . ?
C38 C39 C43 F20 -150.7(2) . . . . ?
C40 C39 C43 F19 -84.3(3) . . . . ?
C38 C39 C43 F19 91.6(3) . . . . ?
C40 C41 C44 F22B -52.4(12) . . . . ?
C42 C41 C44 F22B 128.8(12) . . . . ?
C40 C41 C44 F23B 166.8(11) . . . . ?
C42 C41 C44 F23B -11.9(11) . . . . ?
C40 C41 C44 F24A 107.7(4) . . . . ?
C42 C41 C44 F24A -71.1(4) . . . . ?
C40 C41 C44 F22A -17.0(4) . . . . ?
C42 C41 C44 F22A 164.3(3) . . . . ?
C40 C41 C44 F23A -133.4(3) . . . . ?
C42 C41 C44 F23A 47.9(4) . . . . ?
C40 C41 C44 F24B 56.0(6) . . . . ?
C42 C41 C44 F24B -122.7(5) . . . . ?
C47 O1 C46 C45 179.6(4) . . . . ?
C46 O1 C47 C48 178.7(4) . . . . ?
 
_diffrn_measured_fraction_theta_max    0.814
_diffrn_reflns_theta_full              30.00
_diffrn_measured_fraction_theta_full   0.998
_refine_diff_density_max    2.774
_refine_diff_density_min   -2.484
_refine_diff_density_rms    0.141

#==END

 
data_4-Lu
 
_audit_creation_method            SHELXL-97
_chemical_name_systematic
;
 ?
;
_chemical_name_common             ?
_chemical_melting_point           ?
_chemical_formula_moiety          
 'C24 H62 Lu2 N8, 2(C32 H12 B F24), 2(C4 H10 O)'
_chemical_formula_sum
 'C96 H106 B2 F48 Lu2 N8 O2'
_chemical_formula_weight          2687.45
 
loop_
 _atom_type_symbol
 _atom_type_description
 _atom_type_scat_dispersion_real
 _atom_type_scat_dispersion_imag
 _atom_type_scat_source
 'C'  'C'   0.0033   0.0016
 'International Tables Vol C Tables 4.2.6.8 and 6.1.1.4'
 'H'  'H'   0.0000   0.0000
 'International Tables Vol C Tables 4.2.6.8 and 6.1.1.4'
 'B'  'B'   0.0013   0.0007
 'International Tables Vol C Tables 4.2.6.8 and 6.1.1.4'
 'F'  'F'   0.0171   0.0103
 'International Tables Vol C Tables 4.2.6.8 and 6.1.1.4'
 'N'  'N'   0.0061   0.0033
 'International Tables Vol C Tables 4.2.6.8 and 6.1.1.4'
 'O'  'O'   0.0106   0.0060
 'International Tables Vol C Tables 4.2.6.8 and 6.1.1.4'
 'Lu'  'Lu'  -0.4720   5.8584
 'International Tables Vol C Tables 4.2.6.8 and 6.1.1.4'
 
_symmetry_cell_setting            triclinic
_symmetry_space_group_name_H-M    'P -1'
_symmetry_space_group_name_Hall   '-P 1'

loop_
 _symmetry_equiv_pos_as_xyz
 'x, y, z'
 '-x, -y, -z'
 
_cell_length_a                    12.7943(16)
_cell_length_b                    13.8697(17)
_cell_length_c                    17.211(2)
_cell_angle_alpha                 69.5007(18)
_cell_angle_beta                  70.6680(18)
_cell_angle_gamma                 81.4178(19)
_cell_volume                      2697.5(6)
_cell_formula_units_Z             1
_cell_measurement_temperature     100(2)
_cell_measurement_reflns_used    6329
_cell_measurement_theta_min        2.36
_cell_measurement_theta_max       29.60
 
_exptl_crystal_description        cube
_exptl_crystal_colour             colourless
_exptl_crystal_size_max           0.29
_exptl_crystal_size_mid           0.26
_exptl_crystal_size_min           0.21
_exptl_crystal_density_meas       ?
_exptl_crystal_density_diffrn     1.654
_exptl_crystal_density_method     'not measured'
_exptl_crystal_F_000              1338
_exptl_absorpt_coefficient_mu     1.953
_exptl_absorpt_correction_type    multi-scan
_exptl_absorpt_correction_T_min   0.6013
_exptl_absorpt_correction_T_max   0.6845
_exptl_absorpt_process_details    'Platon Mulabs'
 
_exptl_special_details
;
 ?
;
 
_diffrn_ambient_temperature       100(2)
_diffrn_radiation_wavelength      0.71073
_diffrn_radiation_type            MoK\a
_diffrn_radiation_source          'INCOATEC microsource' 
_diffrn_radiation_monochromator   'multilayer optics'
_diffrn_measurement_device_type   'APEX Area Detector' 
_diffrn_measurement_method        'omega scans'
_diffrn_detector_area_resol_mean  ?
_diffrn_standards_number          ?
_diffrn_standards_interval_count  ?
_diffrn_standards_interval_time   ?
_diffrn_standards_decay_%         ?
_diffrn_reflns_number             42947
_diffrn_reflns_av_R_equivalents   0.0489
_diffrn_reflns_av_sigmaI/netI     0.0625
_diffrn_reflns_limit_h_min        -18
_diffrn_reflns_limit_h_max        18
_diffrn_reflns_limit_k_min        -19
_diffrn_reflns_limit_k_max        19
_diffrn_reflns_limit_l_min        -24
_diffrn_reflns_limit_l_max        24
_diffrn_reflns_theta_min          2.04
_diffrn_reflns_theta_max          30.73
_reflns_number_total              16370
_reflns_number_gt                 14032
_reflns_threshold_expression      >2sigma(I)
 
_computing_data_collection        'Bruker SMART (2001)'
_computing_cell_refinement        'Bruker SMART (2001)'
_computing_data_reduction         'Bruker SAINT+ (1999)'
_computing_structure_solution     'SIR-92 (Altomare 1992)'
_computing_structure_refinement   'SHELXL-97 (Sheldrick, 1997)'
_computing_molecular_graphics     'ORTEP-III (Farrugia, 1999)'

_refine_special_details
;
 Refinement of F^2^ against ALL reflections.  The weighted R-factor wR and
 goodness of fit S are based on F^2^, conventional R-factors R are based
 on F, with F set to zero for negative F^2^. The threshold expression of
 F^2^ > 2sigma(F^2^) is used only for calculating R-factors(gt) etc. and is
 not relevant to the choice of reflections for refinement.  R-factors based
 on F^2^ are statistically about twice as large as those based on F, and R-
 factors based on ALL data will be even larger.
;
 
_refine_ls_structure_factor_coef  Fsqd
_refine_ls_matrix_type            full
_refine_ls_weighting_scheme       calc
_refine_ls_weighting_details
 'calc w=1/[\s^2^(Fo^2^)+(0.0258P)^2^+0.0000P] where P=(Fo^2^+2Fc^2^)/3'
_atom_sites_solution_primary      direct
_atom_sites_solution_secondary    difmap
_atom_sites_solution_hydrogens    geom
_refine_ls_hydrogen_treatment     constr
_refine_ls_extinction_method      none
_refine_ls_extinction_coef        ?
_refine_ls_number_reflns          16370
_refine_ls_number_parameters      889
_refine_ls_number_restraints      3
_refine_ls_R_factor_all           0.0480
_refine_ls_R_factor_gt            0.0394
_refine_ls_wR_factor_ref          0.0787
_refine_ls_wR_factor_gt           0.0757
_refine_ls_goodness_of_fit_ref    1.032
_refine_ls_restrained_S_all       1.033
_refine_ls_shift/su_max           0.002
_refine_ls_shift/su_mean          0.000
 
loop_
 _atom_site_label
 _atom_site_type_symbol
 _atom_site_fract_x
 _atom_site_fract_y
 _atom_site_fract_z
 _atom_site_U_iso_or_equiv
 _atom_site_adp_type
 _atom_site_occupancy
 _atom_site_symmetry_multiplicity
 _atom_site_calc_flag
 _atom_site_refinement_flags
 _atom_site_disorder_assembly
 _atom_site_disorder_group
Lu1 Lu 0.519277(10) 0.092342(9) 0.532075(8) 0.02601(4) Uani 1 1 d . . .
H1 H 0.4651 0.0448 0.4555 0.031 Uiso 0.50 1 d PR C .
H2 H 0.6184 -0.0001 0.4668 0.031 Uiso 0.50 1 d PR . .
H3 H 0.5673 0.0324 0.4319 0.031 Uiso 0.50 1 d PR . .
O1 O 0.8012(2) 0.62698(18) 0.87394(15) 0.0487(6) Uani 1 1 d . . .
N1 N 0.5902(2) 0.24361(18) 0.40639(16) 0.0334(6) Uani 1 1 d D C .
N2 N 0.35751(19) 0.11804(19) 0.64917(16) 0.0324(6) Uani 1 1 d D C .
N3 N 0.6700(2) 0.0220(2) 0.59978(17) 0.0385(6) Uani 1 1 d U C .
N4 N 0.56407(19) 0.22535(19) 0.58575(17) 0.0331(6) Uani 1 1 d . C .
F1 F 0.52615(17) 0.54347(17) 0.21874(15) 0.0718(7) Uani 1 1 d . . .
F2 F 0.62767(17) 0.5914(2) 0.08755(15) 0.0843(9) Uani 1 1 d . . .
F3 F 0.58453(15) 0.69414(16) 0.16090(15) 0.0568(6) Uani 1 1 d . . .
F4A F 0.2399(14) 0.702(2) -0.0763(12) 0.073(4) Uani 0.60(6) 1 d P A -1
F5A F 0.396(2) 0.6247(13) -0.0999(13) 0.075(4) Uani 0.60(6) 1 d P A -1
F6A F 0.3841(13) 0.7891(15) -0.1324(7) 0.075(4) Uani 0.60(6) 1 d P A -1
F4B F 0.248(2) 0.676(4) -0.074(2) 0.085(8) Uani 0.40(6) 1 d P A -2
F5B F 0.421(2) 0.657(4) -0.1145(18) 0.077(8) Uani 0.40(6) 1 d P A -2
F6B F 0.348(5) 0.799(2) -0.1310(15) 0.106(8) Uani 0.40(6) 1 d P A -2
F7 F 0.42281(15) 1.10196(17) 0.01114(12) 0.0555(6) Uani 1 1 d . . .
F8 F 0.47280(14) 1.02055(15) 0.12273(13) 0.0515(5) Uani 1 1 d . . .
F9 F 0.40200(16) 1.17309(15) 0.10718(15) 0.0613(6) Uani 1 1 d . . .
F10 F -0.08353(17) 1.14111(18) 0.20774(14) 0.0633(6) Uani 1 1 d . . .
F11 F -0.06788(16) 1.06797(15) 0.33477(12) 0.0535(5) Uani 1 1 d . . .
F12 F 0.01236(16) 1.20860(14) 0.25473(13) 0.0518(5) Uani 1 1 d . . .
F13 F -0.09679(16) 0.46328(13) 0.28348(13) 0.0467(5) Uani 1 1 d . . .
F14 F -0.24679(17) 0.54329(16) 0.32922(14) 0.0639(6) Uani 1 1 d . . .
F15 F -0.20817(17) 0.51765(14) 0.20706(13) 0.0511(5) Uani 1 1 d . . .
F16 F -0.14219(15) 0.99305(14) 0.05934(12) 0.0444(5) Uani 1 1 d . . .
F17 F -0.24759(17) 0.88807(17) 0.05837(16) 0.0814(9) Uani 1 1 d . . .
F18 F -0.08276(19) 0.90887(15) -0.02952(11) 0.0553(6) Uani 1 1 d . . .
F19 F 0.31166(14) 0.45513(13) 0.47668(13) 0.0436(5) Uani 1 1 d . . .
F20 F 0.15236(16) 0.38921(14) 0.54627(12) 0.0507(5) Uani 1 1 d . . .
F21 F 0.22984(19) 0.39716(14) 0.41310(13) 0.0561(6) Uani 1 1 d . . .
F22A F -0.0463(5) 0.6832(5) 0.6197(3) 0.0676(18) Uani 0.736(10) 1 d P B -1
F23A F -0.1036(3) 0.7979(3) 0.5222(2) 0.0465(11) Uani 0.736(10) 1 d P B -1
F24A F 0.0442(4) 0.8223(5) 0.5416(3) 0.080(3) Uani 0.736(10) 1 d P B -1
F22B F -0.0780(16) 0.7057(14) 0.6061(13) 0.091(7) Uani 0.264(10) 1 d P B -2
F23B F -0.0248(18) 0.8455(10) 0.5073(6) 0.099(9) Uani 0.264(10) 1 d P B -2
F24B F 0.0722(7) 0.7487(9) 0.5856(7) 0.046(3) Uani 0.264(10) 1 d P B -2
B1 B 0.1459(2) 0.7705(2) 0.21792(18) 0.0194(6) Uani 1 1 d . . .
C1A C 0.4734(9) 0.2451(9) 0.4225(8) 0.032(3) Uiso 0.273(2) 1 d P C -1
H1A H 0.4485 0.2327 0.3782 0.038 Uiso 0.273(2) 1 calc PR C -1
H1B H 0.4297 0.3009 0.4439 0.038 Uiso 0.273(2) 1 calc PR C -1
C1B C 0.4798(12) 0.2842(13) 0.3865(12) 0.053(4) Uiso 0.273(2) 1 d PD C -1
H1C H 0.4883 0.3544 0.3454 0.079 Uiso 0.273(2) 1 calc PR C -1
H1D H 0.4217 0.2844 0.4405 0.079 Uiso 0.273(2) 1 calc PR C -1
H1E H 0.4593 0.2395 0.3611 0.079 Uiso 0.273(2) 1 calc PR C -1
C2A C 0.6627(6) 0.2375(5) 0.3188(4) 0.0487(18) Uani 0.546(4) 1 d P C -1
H2A H 0.6654 0.3058 0.2749 0.073 Uiso 0.546(4) 1 calc PR C -1
H2B H 0.6320 0.1890 0.3029 0.073 Uiso 0.546(4) 1 calc PR C -1
H2C H 0.7378 0.2136 0.3218 0.073 Uiso 0.546(4) 1 calc PR C -1
C3A C 0.2518(4) 0.1238(6) 0.6310(5) 0.0440(16) Uani 0.546(4) 1 d P C -1
H3A H 0.2398 0.0575 0.6274 0.066 Uiso 0.546(4) 1 calc PR C -1
H3B H 0.2542 0.1780 0.5756 0.066 Uiso 0.546(4) 1 calc PR C -1
H3C H 0.1911 0.1397 0.6778 0.066 Uiso 0.546(4) 1 calc PR C -1
C4A C 0.3590(6) 0.0328(6) 0.7256(4) 0.0542(19) Uani 0.546(4) 1 d P C -1
H4A H 0.2989 0.0426 0.7755 0.081 Uiso 0.546(4) 1 calc PR C -1
H4B H 0.4303 0.0287 0.7366 0.081 Uiso 0.546(4) 1 calc PR C -1
H4C H 0.3491 -0.0311 0.7172 0.081 Uiso 0.546(4) 1 calc PR C -1
C5A C 0.6742(5) -0.0829(5) 0.6478(4) 0.0427(16) Uani 0.546(4) 1 d P C -1
H5A H 0.7448 -0.1004 0.6612 0.064 Uiso 0.546(4) 1 calc PR C -1
H5B H 0.6680 -0.1242 0.6137 0.064 Uiso 0.546(4) 1 calc PR C -1
H5C H 0.6128 -0.0973 0.7021 0.064 Uiso 0.546(4) 1 calc PR C -1
C6A C 0.7753(5) 0.0371(5) 0.5126(4) 0.0383(14) Uani 0.546(4) 1 d PU C -1
H6A H 0.7728 0.1076 0.4729 0.057 Uiso 0.546(4) 1 calc PR C -1
H6B H 0.7724 -0.0118 0.4839 0.057 Uiso 0.546(4) 1 calc PR C -1
H6C H 0.8442 0.0246 0.5283 0.057 Uiso 0.546(4) 1 calc PR C -1
C7A C 0.6316(6) 0.3244(7) 0.4222(5) 0.0395(18) Uani 0.546(4) 1 d P C -1
H7A H 0.6222 0.3914 0.3785 0.047 Uiso 0.546(4) 1 calc PR C -1
H7B H 0.7118 0.3113 0.4157 0.047 Uiso 0.546(4) 1 calc PR C -1
C8A C 0.5713(6) 0.3295(5) 0.5118(5) 0.0348(15) Uani 0.546(4) 1 d P C -1
H8A H 0.4951 0.3576 0.5133 0.042 Uiso 0.546(4) 1 calc PR C -1
H8B H 0.6088 0.3783 0.5232 0.042 Uiso 0.546(4) 1 calc PR C -1
C9A C 0.3670(7) 0.2182(7) 0.6606(6) 0.041(2) Uani 0.546(4) 1 d P C -1
H9A H 0.3118 0.2218 0.7157 0.049 Uiso 0.546(4) 1 calc PR C -1
H9B H 0.3490 0.2754 0.6124 0.049 Uiso 0.546(4) 1 calc PR C -1
C10A C 0.4807(8) 0.2323(7) 0.6621(6) 0.0375(19) Uani 0.546(4) 1 d P C -1
H10A H 0.4825 0.3005 0.6679 0.045 Uiso 0.546(4) 1 calc PR C -1
H10B H 0.4962 0.1790 0.7134 0.045 Uiso 0.546(4) 1 calc PR C -1
C11A C 0.6888(17) 0.087(2) 0.6416(13) 0.037(4) Uani 0.546(4) 1 d P C -1
H11A H 0.7646 0.0720 0.6470 0.045 Uiso 0.546(4) 1 calc PR C -1
H11B H 0.6363 0.0698 0.7013 0.045 Uiso 0.546(4) 1 calc PR C -1
C12A C 0.6763(5) 0.2029(5) 0.5965(4) 0.0338(14) Uani 0.546(4) 1 d P C -1
H12A H 0.6862 0.2418 0.6319 0.041 Uiso 0.546(4) 1 calc PR C -1
H12B H 0.7333 0.2240 0.5390 0.041 Uiso 0.546(4) 1 calc PR C -1
C1C C 0.3313(14) 0.1671(13) 0.5727(10) 0.046(4) Uiso 0.227(2) 1 d P C -2
H1F H 0.3244 0.2432 0.5548 0.055 Uiso 0.227(2) 1 calc PR C -2
H1G H 0.2729 0.1360 0.5641 0.055 Uiso 0.227(2) 1 calc PR C -2
C1D C 0.2761(13) 0.1819(12) 0.6023(10) 0.037(3) Uiso 0.227(2) 1 d PD C -2
H1H H 0.2096 0.1990 0.6445 0.056 Uiso 0.227(2) 1 calc PR C -2
H1I H 0.2556 0.1425 0.5724 0.056 Uiso 0.227(2) 1 calc PR C -2
H1J H 0.3106 0.2456 0.5596 0.056 Uiso 0.227(2) 1 calc PR C -2
C2B C 0.2865(7) 0.0296(7) 0.7150(5) 0.051(2) Uani 0.454(4) 1 d P C -2
H2D H 0.3272 -0.0146 0.7546 0.076 Uiso 0.454(4) 1 calc PR C -2
H2E H 0.2684 -0.0106 0.6846 0.076 Uiso 0.454(4) 1 calc PR C -2
H2F H 0.2180 0.0569 0.7483 0.076 Uiso 0.454(4) 1 calc PR C -2
C3B C 0.5271(7) 0.2748(6) 0.3443(5) 0.045(2) Uani 0.454(4) 1 d P C -2
H3D H 0.4512 0.2952 0.3724 0.068 Uiso 0.454(4) 1 calc PR C -2
H3E H 0.5256 0.2171 0.3244 0.068 Uiso 0.454(4) 1 calc PR C -2
H3F H 0.5621 0.3332 0.2944 0.068 Uiso 0.454(4) 1 calc PR C -2
C4B C 0.7064(6) 0.2219(7) 0.3666(6) 0.055(2) Uani 0.454(4) 1 d P C -2
H4D H 0.7379 0.2824 0.3175 0.082 Uiso 0.454(4) 1 calc PR C -2
H4E H 0.7133 0.1632 0.3458 0.082 Uiso 0.454(4) 1 calc PR C -2
H4F H 0.7464 0.2054 0.4097 0.082 Uiso 0.454(4) 1 calc PR C -2
C5B C 0.5968(7) -0.0568(6) 0.6950(5) 0.045(2) Uani 0.454(4) 1 d P C -2
H5D H 0.6440 -0.0855 0.7331 0.067 Uiso 0.454(4) 1 calc PR C -2
H5E H 0.5700 -0.1129 0.6852 0.067 Uiso 0.454(4) 1 calc PR C -2
H5F H 0.5335 -0.0182 0.7224 0.067 Uiso 0.454(4) 1 calc PR C -2
C6B C 0.7503(7) -0.0470(7) 0.5659(6) 0.053(2) Uani 0.454(4) 1 d P C -2
H6D H 0.7921 -0.0109 0.5057 0.080 Uiso 0.454(4) 1 calc PR C -2
H6E H 0.7131 -0.1048 0.5675 0.080 Uiso 0.454(4) 1 calc PR C -2
H6F H 0.8012 -0.0730 0.6012 0.080 Uiso 0.454(4) 1 calc PR C -2
C7B C 0.3740(9) 0.1782(9) 0.7006(7) 0.047(3) Uani 0.454(4) 1 d P C -2
H7C H 0.4055 0.1327 0.7469 0.057 Uiso 0.454(4) 1 calc PR C -2
H7D H 0.3021 0.2081 0.7283 0.057 Uiso 0.454(4) 1 calc PR C -2
C8B C 0.4536(9) 0.2643(9) 0.6389(8) 0.041(3) Uani 0.454(4) 1 d P C -2
H8C H 0.4698 0.3011 0.6733 0.049 Uiso 0.454(4) 1 calc PR C -2
H8D H 0.4164 0.3143 0.5981 0.049 Uiso 0.454(4) 1 calc PR C -2
C9B C 0.5801(8) 0.3315(8) 0.4432(8) 0.052(3) Uani 0.454(4) 1 d P C -2
H9C H 0.6220 0.3902 0.3966 0.062 Uiso 0.454(4) 1 calc PR C -2
H9D H 0.5012 0.3548 0.4596 0.062 Uiso 0.454(4) 1 calc PR C -2
C10B C 0.6209(7) 0.3052(7) 0.5204(8) 0.050(3) Uani 0.454(4) 1 d P C -2
H10C H 0.7010 0.2860 0.5042 0.060 Uiso 0.454(4) 1 calc PR C -2
H10D H 0.6106 0.3658 0.5403 0.060 Uiso 0.454(4) 1 calc PR C -2
C11B C 0.712(2) 0.098(2) 0.6241(16) 0.034(4) Uani 0.454(4) 1 d P C -2
H11C H 0.7457 0.0599 0.6708 0.041 Uiso 0.454(4) 1 calc PR C -2
H11D H 0.7703 0.1366 0.5732 0.041 Uiso 0.454(4) 1 calc PR C -2
C12B C 0.6270(6) 0.1705(7) 0.6540(6) 0.049(2) Uani 0.454(4) 1 d P C -2
H12C H 0.6624 0.2226 0.6635 0.059 Uiso 0.454(4) 1 calc PR C -2
H12D H 0.5738 0.1337 0.7101 0.059 Uiso 0.454(4) 1 calc PR C -2
C13 C 0.2525(2) 0.72604(18) 0.15336(16) 0.0196(5) Uani 1 1 d . . .
C14 C 0.3519(2) 0.69141(19) 0.17296(16) 0.0214(5) Uani 1 1 d . . .
H14 H 0.3569 0.6905 0.2271 0.026 Uiso 1 1 calc R . .
C15 C 0.4435(2) 0.6583(2) 0.11675(17) 0.0246(6) Uani 1 1 d . . .
C16 C 0.4408(2) 0.6597(2) 0.03666(18) 0.0269(6) Uani 1 1 d . . .
H16 H 0.5031 0.6363 -0.0017 0.032 Uiso 1 1 calc R . .
C17 C 0.3445(2) 0.6963(2) 0.01410(16) 0.0256(6) Uani 1 1 d . A .
C18 C 0.2522(2) 0.7276(2) 0.07167(16) 0.0227(5) Uani 1 1 d . . .
H18 H 0.1867 0.7508 0.0549 0.027 Uiso 1 1 calc R . .
C19 C 0.5451(2) 0.6211(3) 0.1445(2) 0.0366(7) Uani 1 1 d . . .
C20 C 0.3399(3) 0.7050(3) -0.0740(2) 0.0409(8) Uani 1 1 d . . .
C21 C 0.1629(2) 0.89257(19) 0.19826(15) 0.0192(5) Uani 1 1 d . . .
C22 C 0.2658(2) 0.93934(19) 0.15491(16) 0.0212(5) Uani 1 1 d . . .
H22 H 0.3283 0.8996 0.1327 0.025 Uiso 1 1 calc R . .
C23 C 0.2795(2) 1.0418(2) 0.14329(17) 0.0237(5) Uani 1 1 d . . .
C24 C 0.1920(2) 1.1032(2) 0.17447(17) 0.0256(6) Uani 1 1 d . . .
H24 H 0.2017 1.1728 0.1670 0.031 Uiso 1 1 calc R . .
C25 C 0.0888(2) 1.0589(2) 0.21734(16) 0.0226(5) Uani 1 1 d . . .
C26 C 0.0755(2) 0.9575(2) 0.22745(15) 0.0217(5) Uani 1 1 d . . .
H26 H 0.0035 0.9307 0.2556 0.026 Uiso 1 1 calc R . .
C27 C 0.3926(2) 1.0854(2) 0.0959(2) 0.0327(7) Uani 1 1 d . . .
C28 C -0.0112(2) 1.1204(2) 0.2526(2) 0.0331(7) Uani 1 1 d . . .
C29 C 0.03340(19) 0.75469(19) 0.19872(15) 0.0180(5) Uani 1 1 d . . .
C30 C -0.0182(2) 0.66061(19) 0.23495(15) 0.0197(5) Uani 1 1 d . . .
H30 H 0.0085 0.6062 0.2764 0.024 Uiso 1 1 calc R . .
C31 C -0.1076(2) 0.6430(2) 0.21288(16) 0.0211(5) Uani 1 1 d . . .
C32 C -0.1495(2) 0.7205(2) 0.15331(16) 0.0229(5) Uani 1 1 d . . .
H32 H -0.2100 0.7091 0.1376 0.027 Uiso 1 1 calc R . .
C33 C -0.1009(2) 0.8152(2) 0.11725(16) 0.0229(5) Uani 1 1 d . . .
C34 C -0.0112(2) 0.8316(2) 0.13909(15) 0.0214(5) Uani 1 1 d . . .
H34 H 0.0208 0.8973 0.1126 0.026 Uiso 1 1 calc R . .
C35 C -0.1636(2) 0.5424(2) 0.25669(19) 0.0313(6) Uani 1 1 d . . .
C36 C -0.1436(2) 0.9005(2) 0.05179(19) 0.0349(7) Uani 1 1 d . . .
C37 C 0.13255(19) 0.70692(19) 0.32197(15) 0.0195(5) Uani 1 1 d . . .
C38 C 0.1723(2) 0.6056(2) 0.35217(16) 0.0230(5) Uani 1 1 d . . .
H38 H 0.2105 0.5713 0.3111 0.028 Uiso 1 1 calc R . .
C39 C 0.1580(2) 0.5532(2) 0.43995(17) 0.0258(6) Uani 1 1 d . . .
C40 C 0.0991(2) 0.5985(2) 0.50264(17) 0.0290(6) Uani 1 1 d . . .
H40 H 0.0887 0.5625 0.5627 0.035 Uiso 1 1 calc R . .
C41 C 0.0560(2) 0.6974(2) 0.47500(17) 0.0269(6) Uani 1 1 d . B .
C42 C 0.0735(2) 0.7504(2) 0.38713(16) 0.0236(5) Uani 1 1 d . . .
H42 H 0.0442 0.8190 0.3704 0.028 Uiso 1 1 calc R . .
C43 C 0.2117(3) 0.4490(2) 0.46809(19) 0.0344(7) Uani 1 1 d . . .
C44 C -0.0081(3) 0.7500(3) 0.5403(2) 0.0424(8) Uani 1 1 d . . .
C45 C 0.9051(4) 0.6305(4) 0.9644(3) 0.0775(13) Uani 1 1 d . . .
H45A H 0.9582 0.6811 0.9202 0.116 Uiso 1 1 calc R . .
H45B H 0.9400 0.5844 1.0075 0.116 Uiso 1 1 calc R . .
H45C H 0.8402 0.6663 0.9934 0.116 Uiso 1 1 calc R . .
C46 C 0.8704(4) 0.5702(3) 0.9229(3) 0.0731(13) Uani 1 1 d . . .
H46A H 0.9370 0.5451 0.8847 0.088 Uiso 1 1 calc R . .
H46B H 0.8312 0.5093 0.9683 0.088 Uiso 1 1 calc R . .
C47 C 0.7635(4) 0.5741(3) 0.8335(3) 0.0746(13) Uani 1 1 d . . .
H47A H 0.7231 0.5134 0.8781 0.089 Uiso 1 1 calc R . .
H47B H 0.8280 0.5488 0.7937 0.089 Uiso 1 1 calc R . .
C48 C 0.6908(3) 0.6382(4) 0.7844(3) 0.0687(12) Uani 1 1 d . . .
H48A H 0.6283 0.6657 0.8230 0.103 Uiso 1 1 calc R . .
H48B H 0.6629 0.5968 0.7601 0.103 Uiso 1 1 calc R . .
H48C H 0.7322 0.6953 0.7370 0.103 Uiso 1 1 calc R . .
 
loop_
 _atom_site_aniso_label
 _atom_site_aniso_U_11
 _atom_site_aniso_U_22
 _atom_site_aniso_U_33
 _atom_site_aniso_U_23
 _atom_site_aniso_U_13
 _atom_site_aniso_U_12
Lu1 0.02446(6) 0.03017(7) 0.02775(7) -0.01340(5) -0.00529(5) -0.00977(5)
O1 0.0583(16) 0.0393(13) 0.0467(14) -0.0184(11) -0.0086(12) -0.0022(12)
N1 0.0346(14) 0.0238(12) 0.0347(14) -0.0083(11) -0.0007(11) -0.0055(10)
N2 0.0277(13) 0.0337(14) 0.0374(14) -0.0186(12) -0.0021(11) -0.0057(10)
N3 0.0409(15) 0.0423(16) 0.0480(16) -0.0242(13) -0.0271(12) 0.0074(12)
N4 0.0265(13) 0.0380(14) 0.0468(16) -0.0271(12) -0.0115(11) -0.0020(11)
F1 0.0448(13) 0.0632(15) 0.0823(17) 0.0194(13) -0.0333(12) -0.0014(11)
F2 0.0426(13) 0.150(3) 0.0800(17) -0.0747(17) -0.0268(12) 0.0503(14)
F3 0.0364(11) 0.0638(14) 0.0878(16) -0.0303(12) -0.0354(11) -0.0007(10)
F4A 0.036(4) 0.166(13) 0.041(4) -0.060(6) -0.013(4) -0.003(7)
F5A 0.108(10) 0.081(6) 0.062(6) -0.054(4) -0.031(6) 0.015(5)
F6A 0.095(7) 0.104(9) 0.021(3) 0.010(3) -0.022(4) -0.057(6)
F4B 0.068(14) 0.159(18) 0.048(7) -0.054(8) 0.004(8) -0.062(13)
F5B 0.047(7) 0.16(2) 0.047(8) -0.073(12) -0.013(5) 0.031(9)
F6B 0.21(2) 0.070(8) 0.059(8) 0.007(6) -0.083(12) -0.028(14)
F7 0.0370(11) 0.0820(16) 0.0384(11) -0.0100(10) 0.0007(9) -0.0270(10)
F8 0.0268(10) 0.0509(12) 0.0714(14) -0.0053(10) -0.0191(9) -0.0114(9)
F9 0.0435(12) 0.0416(11) 0.0988(17) -0.0352(12) 0.0003(11) -0.0216(9)
F10 0.0466(12) 0.0860(16) 0.0800(16) -0.0560(13) -0.0339(11) 0.0370(11)
F11 0.0502(12) 0.0465(12) 0.0453(12) -0.0203(9) 0.0152(9) -0.0016(9)
F12 0.0559(12) 0.0336(10) 0.0634(13) -0.0307(10) 0.0016(10) -0.0027(9)
F13 0.0541(12) 0.0246(9) 0.0663(13) -0.0003(9) -0.0363(10) -0.0092(8)
F14 0.0590(14) 0.0519(13) 0.0605(14) -0.0172(11) 0.0214(11) -0.0362(11)
F15 0.0736(14) 0.0339(10) 0.0622(13) -0.0027(9) -0.0466(11) -0.0221(10)
F16 0.0531(12) 0.0333(10) 0.0452(11) -0.0057(8) -0.0255(9) 0.0109(9)
F17 0.0518(13) 0.0722(16) 0.0980(18) 0.0439(13) -0.0573(13) -0.0326(11)
F18 0.0911(16) 0.0479(12) 0.0240(10) -0.0005(8) -0.0240(10) -0.0056(11)
F19 0.0347(10) 0.0327(10) 0.0640(13) -0.0100(9) -0.0229(9) 0.0020(8)
F20 0.0495(12) 0.0366(11) 0.0460(11) 0.0150(9) -0.0153(9) -0.0107(9)
F21 0.1022(17) 0.0268(10) 0.0530(12) -0.0134(9) -0.0440(12) 0.0064(10)
F22A 0.054(3) 0.095(3) 0.0193(17) -0.0046(17) 0.0021(18) 0.035(2)
F23A 0.054(2) 0.046(2) 0.0395(17) -0.0210(15) -0.0140(15) 0.0161(16)
F24A 0.068(3) 0.119(6) 0.070(4) -0.076(4) 0.024(2) -0.045(3)
F22B 0.058(10) 0.087(12) 0.108(15) -0.068(11) 0.053(9) -0.037(9)
F23B 0.17(2) 0.077(10) 0.037(6) -0.036(6) -0.037(8) 0.078(13)
F24B 0.060(5) 0.044(6) 0.045(5) -0.030(5) -0.015(4) -0.001(4)
B1 0.0174(13) 0.0229(14) 0.0194(14) -0.0071(11) -0.0054(11) -0.0047(11)
C2A 0.053(4) 0.050(4) 0.028(3) -0.006(3) 0.000(3) -0.005(3)
C3A 0.020(3) 0.051(4) 0.061(4) -0.025(4) -0.003(3) -0.006(3)
C4A 0.052(5) 0.061(5) 0.042(4) -0.014(3) -0.002(3) -0.014(4)
C5A 0.045(4) 0.038(3) 0.040(4) -0.007(3) -0.011(3) -0.007(3)
C6A 0.033(3) 0.037(3) 0.043(3) -0.014(3) -0.006(2) -0.001(3)
C7A 0.040(4) 0.035(4) 0.039(4) -0.003(3) -0.009(4) -0.018(4)
C8A 0.043(4) 0.019(3) 0.049(4) -0.014(3) -0.018(4) -0.004(3)
C9A 0.030(3) 0.045(5) 0.057(6) -0.039(4) -0.003(4) 0.001(4)
C10A 0.044(5) 0.041(5) 0.044(5) -0.029(4) -0.017(3) -0.003(4)
C11A 0.037(10) 0.047(6) 0.030(6) -0.004(5) -0.017(6) -0.014(7)
C12A 0.032(3) 0.042(3) 0.040(3) -0.023(3) -0.015(3) -0.006(3)
C2B 0.035(4) 0.054(5) 0.049(5) -0.014(4) 0.008(4) -0.012(4)
C3B 0.054(5) 0.035(4) 0.031(4) 0.004(3) -0.008(4) -0.005(4)
C4B 0.033(4) 0.054(5) 0.067(6) -0.025(5) 0.008(4) -0.008(4)
C5B 0.051(5) 0.052(5) 0.038(4) -0.014(4) -0.018(4) -0.009(4)
C6B 0.043(5) 0.070(6) 0.059(6) -0.040(5) -0.017(4) 0.015(4)
C7B 0.027(4) 0.066(8) 0.057(7) -0.042(6) 0.001(5) -0.001(5)
C8B 0.032(5) 0.052(7) 0.059(8) -0.047(6) -0.013(4) 0.011(4)
C9B 0.044(6) 0.023(4) 0.077(8) -0.017(4) 0.005(6) -0.017(5)
C10B 0.031(5) 0.036(5) 0.099(8) -0.042(5) -0.016(5) -0.001(4)
C11B 0.017(7) 0.048(10) 0.047(12) -0.024(9) -0.007(6) -0.013(5)
C12B 0.034(4) 0.074(6) 0.061(6) -0.052(5) -0.005(4) -0.015(4)
C13 0.0200(12) 0.0172(12) 0.0211(12) -0.0052(10) -0.0044(10) -0.0059(10)
C14 0.0203(12) 0.0241(13) 0.0223(13) -0.0097(10) -0.0055(10) -0.0050(10)
C15 0.0181(12) 0.0241(13) 0.0304(14) -0.0086(11) -0.0050(11) -0.0031(10)
C16 0.0235(13) 0.0267(14) 0.0286(14) -0.0135(12) 0.0013(11) -0.0053(11)
C17 0.0288(14) 0.0280(14) 0.0200(13) -0.0089(11) -0.0022(11) -0.0103(11)
C18 0.0206(13) 0.0242(13) 0.0218(13) -0.0063(10) -0.0031(10) -0.0068(10)
C19 0.0254(15) 0.0448(19) 0.0397(18) -0.0181(15) -0.0070(13) 0.0033(13)
C20 0.0333(18) 0.064(2) 0.0303(17) -0.0239(17) -0.0024(14) -0.0098(16)
C21 0.0212(12) 0.0227(13) 0.0154(11) -0.0057(10) -0.0069(10) -0.0038(10)
C22 0.0228(13) 0.0226(13) 0.0189(12) -0.0060(10) -0.0067(10) -0.0034(10)
C23 0.0236(13) 0.0252(13) 0.0229(13) -0.0054(11) -0.0071(11) -0.0085(11)
C24 0.0322(15) 0.0214(13) 0.0281(14) -0.0090(11) -0.0129(12) -0.0043(11)
C25 0.0245(13) 0.0253(13) 0.0199(12) -0.0089(10) -0.0082(10) 0.0012(11)
C26 0.0213(13) 0.0261(13) 0.0174(12) -0.0064(10) -0.0047(10) -0.0045(10)
C27 0.0274(15) 0.0301(15) 0.0396(17) -0.0093(13) -0.0072(13) -0.0103(12)
C28 0.0344(16) 0.0322(16) 0.0352(16) -0.0174(13) -0.0070(13) -0.0001(13)
C29 0.0161(11) 0.0234(12) 0.0147(11) -0.0069(10) -0.0030(9) -0.0032(9)
C30 0.0198(12) 0.0218(12) 0.0174(12) -0.0048(10) -0.0061(10) -0.0031(10)
C31 0.0187(12) 0.0249(13) 0.0198(12) -0.0064(10) -0.0042(10) -0.0073(10)
C32 0.0187(12) 0.0310(14) 0.0196(12) -0.0064(11) -0.0053(10) -0.0082(11)
C33 0.0215(13) 0.0275(14) 0.0174(12) -0.0031(10) -0.0058(10) -0.0047(10)
C34 0.0216(13) 0.0232(13) 0.0166(12) -0.0028(10) -0.0036(10) -0.0070(10)
C35 0.0328(16) 0.0288(15) 0.0354(16) -0.0058(13) -0.0151(13) -0.0100(12)
C36 0.0321(16) 0.0379(17) 0.0320(16) 0.0035(13) -0.0165(13) -0.0145(13)
C37 0.0166(12) 0.0243(13) 0.0190(12) -0.0054(10) -0.0063(10) -0.0069(10)
C38 0.0225(13) 0.0267(14) 0.0217(13) -0.0072(11) -0.0073(10) -0.0066(11)
C39 0.0251(14) 0.0251(14) 0.0265(14) -0.0014(11) -0.0114(11) -0.0079(11)
C40 0.0299(15) 0.0369(16) 0.0174(13) -0.0006(11) -0.0082(11) -0.0108(12)
C41 0.0231(13) 0.0376(16) 0.0201(13) -0.0087(12) -0.0053(11) -0.0059(12)
C42 0.0231(13) 0.0275(14) 0.0206(13) -0.0055(11) -0.0082(10) -0.0039(11)
C43 0.0411(18) 0.0290(15) 0.0330(16) -0.0015(13) -0.0173(14) -0.0080(13)
C44 0.047(2) 0.056(2) 0.0237(16) -0.0155(15) -0.0052(15) -0.0064(17)
C45 0.096(4) 0.078(3) 0.063(3) -0.022(3) -0.032(3) 0.002(3)
C46 0.112(4) 0.042(2) 0.063(3) -0.016(2) -0.033(3) 0.017(2)
C47 0.109(4) 0.037(2) 0.087(3) -0.026(2) -0.034(3) -0.007(2)
C48 0.057(3) 0.087(3) 0.076(3) -0.052(3) -0.008(2) -0.010(2)
 
_geom_special_details
;
 All esds (except the esd in the dihedral angle between two l.s. planes)
 are estimated using the full covariance matrix.  The cell esds are taken
 into account individually in the estimation of esds in distances, angles
 and torsion angles; correlations between esds in cell parameters are only
 used when they are defined by crystal symmetry.  An approximate (isotropic)
 treatment of cell esds is used for estimating esds involving l.s. planes.
;
 
loop_
 _geom_bond_atom_site_label_1
 _geom_bond_atom_site_label_2
 _geom_bond_distance
 _geom_bond_site_symmetry_2
 _geom_bond_publ_flag
Lu1 C1A 2.441(12) . ?
Lu1 N2 2.448(2) . ?
Lu1 N1 2.448(2) . ?
Lu1 C1C 2.450(17) . ?
Lu1 N3 2.482(2) . ?
Lu1 N4 2.539(2) . ?
Lu1 Lu1 3.2775(4) 2_656 ?
Lu1 H1 2.0005 . ?
Lu1 H2 2.0234 . ?
Lu1 H3 2.0480 . ?
O1 C46 1.391(5) . ?
O1 C47 1.394(5) . ?
N1 C1A 1.425(11) . ?
N1 C7A 1.448(9) . ?
N1 C4B 1.452(8) . ?
N1 C3B 1.457(8) . ?
N1 C2A 1.510(6) . ?
N1 C9B 1.531(11) . ?
N1 C1B 1.541(12) . ?
N2 C1C 1.381(16) . ?
N2 C4A 1.432(7) . ?
N2 C3A 1.471(6) . ?
N2 C7B 1.490(11) . ?
N2 C9A 1.497(9) . ?
N2 C2B 1.513(8) . ?
N2 C1D 1.517(12) . ?
N3 C5A 1.403(6) . ?
N3 C6B 1.418(8) . ?
N3 C11A 1.43(3) . ?
N3 C11B 1.48(3) . ?
N3 C6A 1.623(6) . ?
N3 C5B 1.671(8) . ?
N4 C10B 1.358(10) . ?
N4 C10A 1.415(10) . ?
N4 C12A 1.481(6) . ?
N4 C8A 1.546(7) . ?
N4 C8B 1.546(11) . ?
N4 C12B 1.557(9) . ?
F1 C19 1.326(4) . ?
F2 C19 1.310(3) . ?
F3 C19 1.344(4) . ?
F4A C20 1.300(15) . ?
F5A C20 1.360(15) . ?
F6A C20 1.300(14) . ?
F4B C20 1.30(3) . ?
F5B C20 1.28(2) . ?
F6B C20 1.32(3) . ?
F7 C27 1.322(3) . ?
F8 C27 1.350(3) . ?
F9 C27 1.325(3) . ?
F10 C28 1.332(3) . ?
F11 C28 1.347(3) . ?
F12 C28 1.319(3) . ?
F13 C35 1.332(3) . ?
F14 C35 1.348(3) . ?
F15 C35 1.326(3) . ?
F16 C36 1.338(3) . ?
F17 C36 1.329(3) . ?
F18 C36 1.330(3) . ?
F19 C43 1.353(3) . ?
F20 C43 1.343(3) . ?
F21 C43 1.322(3) . ?
F22A C44 1.330(7) . ?
F23A C44 1.377(5) . ?
F24A C44 1.296(5) . ?
F22B C44 1.210(16) . ?
F23B C44 1.262(11) . ?
F24B C44 1.477(10) . ?
B1 C21 1.640(4) . ?
B1 C29 1.640(4) . ?
B1 C13 1.643(4) . ?
B1 C37 1.658(4) . ?
C1A H1A 0.9900 . ?
C1A H1B 0.9900 . ?
C1B H1C 0.9800 . ?
C1B H1D 0.9800 . ?
C1B H1E 0.9800 . ?
C2A H2A 0.9800 . ?
C2A H2B 0.9800 . ?
C2A H2C 0.9800 . ?
C3A H3A 0.9800 . ?
C3A H3B 0.9800 . ?
C3A H3C 0.9800 . ?
C4A H4A 0.9800 . ?
C4A H4B 0.9800 . ?
C4A H4C 0.9800 . ?
C5A H5A 0.9800 . ?
C5A H5B 0.9800 . ?
C5A H5C 0.9800 . ?
C6A H6A 0.9800 . ?
C6A H6B 0.9800 . ?
C6A H6C 0.9800 . ?
C7A C8A 1.501(11) . ?
C7A H7A 0.9900 . ?
C7A H7B 0.9900 . ?
C8A H8A 0.9900 . ?
C8A H8B 0.9900 . ?
C9A C10A 1.507(12) . ?
C9A H9A 0.9900 . ?
C9A H9B 0.9900 . ?
C10A H10A 0.9900 . ?
C10A H10B 0.9900 . ?
C11A C12A 1.53(3) . ?
C11A H11A 0.9900 . ?
C11A H11B 0.9900 . ?
C12A H12A 0.9900 . ?
C12A H12B 0.9900 . ?
C1C H1F 0.9900 . ?
C1C H1G 0.9900 . ?
C1D H1H 0.9800 . ?
C1D H1I 0.9800 . ?
C1D H1J 0.9800 . ?
C2B H2D 0.9800 . ?
C2B H2E 0.9800 . ?
C2B H2F 0.9800 . ?
C3B H3D 0.9800 . ?
C3B H3E 0.9800 . ?
C3B H3F 0.9800 . ?
C4B H4D 0.9800 . ?
C4B H4E 0.9800 . ?
C4B H4F 0.9800 . ?
C5B H5D 0.9800 . ?
C5B H5E 0.9800 . ?
C5B H5F 0.9800 . ?
C6B H6D 0.9800 . ?
C6B H6E 0.9800 . ?
C6B H6F 0.9800 . ?
C7B C8B 1.533(18) . ?
C7B H7C 0.9900 . ?
C7B H7D 0.9900 . ?
C8B H8C 0.9900 . ?
C8B H8D 0.9900 . ?
C9B C10B 1.495(17) . ?
C9B H9C 0.9900 . ?
C9B H9D 0.9900 . ?
C10B H10C 0.9900 . ?
C10B H10D 0.9900 . ?
C11B C12B 1.46(3) . ?
C11B H11C 0.9900 . ?
C11B H11D 0.9900 . ?
C12B H12C 0.9900 . ?
C12B H12D 0.9900 . ?
C13 C14 1.397(3) . ?
C13 C18 1.400(3) . ?
C14 C15 1.386(3) . ?
C14 H14 0.9500 . ?
C15 C16 1.384(4) . ?
C15 C19 1.491(4) . ?
C16 C17 1.385(4) . ?
C16 H16 0.9500 . ?
C17 C18 1.392(4) . ?
C17 C20 1.499(4) . ?
C18 H18 0.9500 . ?
C21 C26 1.400(3) . ?
C21 C22 1.405(3) . ?
C22 C23 1.393(3) . ?
C22 H22 0.9500 . ?
C23 C24 1.380(4) . ?
C23 C27 1.503(4) . ?
C24 C25 1.394(4) . ?
C24 H24 0.9500 . ?
C25 C26 1.385(4) . ?
C25 C28 1.500(4) . ?
C26 H26 0.9500 . ?
C29 C30 1.394(3) . ?
C29 C34 1.399(3) . ?
C30 C31 1.396(3) . ?
C30 H30 0.9500 . ?
C31 C32 1.383(4) . ?
C31 C35 1.494(4) . ?
C32 C33 1.383(3) . ?
C32 H32 0.9500 . ?
C33 C34 1.390(3) . ?
C33 C36 1.500(4) . ?
C34 H34 0.9500 . ?
C37 C38 1.397(4) . ?
C37 C42 1.403(3) . ?
C38 C39 1.390(3) . ?
C38 H38 0.9500 . ?
C39 C40 1.386(4) . ?
C39 C43 1.493(4) . ?
C40 C41 1.379(4) . ?
C40 H40 0.9500 . ?
C41 C42 1.387(3) . ?
C41 C44 1.501(4) . ?
C42 H42 0.9500 . ?
C45 C46 1.465(6) . ?
C45 H45A 0.9800 . ?
C45 H45B 0.9800 . ?
C45 H45C 0.9800 . ?
C46 H46A 0.9900 . ?
C46 H46B 0.9900 . ?
C47 C48 1.455(6) . ?
C47 H47A 0.9900 . ?
C47 H47B 0.9900 . ?
C48 H48A 0.9800 . ?
C48 H48B 0.9800 . ?
C48 H48C 0.9800 . ?
 
loop_
 _geom_angle_atom_site_label_1
 _geom_angle_atom_site_label_2
 _geom_angle_atom_site_label_3
 _geom_angle
 _geom_angle_site_symmetry_1
 _geom_angle_site_symmetry_3
 _geom_angle_publ_flag
C1A Lu1 N2 93.4(3) . . ?
C1A Lu1 N1 33.9(3) . . ?
N2 Lu1 N1 117.75(8) . . ?
C1A Lu1 C1C 63.8(4) . . ?
N2 Lu1 C1C 32.7(4) . . ?
N1 Lu1 C1C 94.5(4) . . ?
C1A Lu1 N3 139.8(3) . . ?
N2 Lu1 N3 105.68(9) . . ?
N1 Lu1 N3 107.05(9) . . ?
C1C Lu1 N3 137.5(4) . . ?
C1A Lu1 N4 82.8(3) . . ?
N2 Lu1 N4 71.61(8) . . ?
N1 Lu1 N4 71.52(8) . . ?
C1C Lu1 N4 82.7(4) . . ?
N3 Lu1 N4 70.75(8) . . ?
C1A Lu1 Lu1 101.5(3) . 2_656 ?
N2 Lu1 Lu1 110.96(6) . 2_656 ?
N1 Lu1 Lu1 110.30(6) . 2_656 ?
C1C Lu1 Lu1 101.9(4) . 2_656 ?
N3 Lu1 Lu1 104.00(6) . 2_656 ?
N4 Lu1 Lu1 174.72(6) . 2_656 ?
C1A Lu1 H1 72.3 . . ?
N2 Lu1 H1 107.6 . . ?
N1 Lu1 H1 88.1 . . ?
C1C Lu1 H1 84.8 . . ?
N3 Lu1 H1 130.8 . . ?
N4 Lu1 H1 155.1 . . ?
Lu1 Lu1 H1 29.5 2_656 . ?
C1A Lu1 H2 106.3 . . ?
N2 Lu1 H2 150.5 . . ?
N1 Lu1 H2 89.8 . . ?
C1C Lu1 H2 144.6 . . ?
N3 Lu1 H2 73.0 . . ?
N4 Lu1 H2 131.5 . . ?
Lu1 Lu1 H2 44.5 2_656 . ?
H1 Lu1 H2 60.2 . . ?
C1A Lu1 H3 82.9 . . ?
N2 Lu1 H3 142.3 . . ?
N1 Lu1 H3 78.2 . . ?
C1C Lu1 H3 119.4 . . ?
N3 Lu1 H3 100.8 . . ?
N4 Lu1 H3 143.9 . . ?
Lu1 Lu1 H3 35.2 2_656 . ?
H1 Lu1 H3 35.6 . . ?
H2 Lu1 H3 28.1 . . ?
C46 O1 C47 115.7(3) . . ?
C1A N1 C7A 116.4(6) . . ?
C1A N1 C4B 157.1(6) . . ?
C7A N1 C4B 84.4(5) . . ?
C1A N1 C3B 50.9(6) . . ?
C7A N1 C3B 117.4(5) . . ?
C4B N1 C3B 112.3(5) . . ?
C1A N1 C2A 116.8(6) . . ?
C7A N1 C2A 107.2(4) . . ?
C4B N1 C9B 109.3(5) . . ?
C3B N1 C9B 107.8(6) . . ?
C4B N1 C1B 143.3(8) . . ?
C9B N1 C1B 88.0(8) . . ?
C1A N1 Lu1 72.8(5) . . ?
C7A N1 Lu1 117.1(4) . . ?
C4B N1 Lu1 107.6(4) . . ?
C3B N1 Lu1 113.8(3) . . ?
C2A N1 Lu1 123.5(3) . . ?
C9B N1 Lu1 105.8(5) . . ?
C1B N1 Lu1 97.7(7) . . ?
C4A N2 C3A 110.0(4) . . ?
C4A N2 C9A 111.5(5) . . ?
C3A N2 C9A 106.9(5) . . ?
C7B N2 C2B 105.5(6) . . ?
C1C N2 Lu1 73.7(7) . . ?
C4A N2 Lu1 106.5(3) . . ?
C3A N2 Lu1 113.4(3) . . ?
C7B N2 Lu1 116.6(4) . . ?
C9A N2 Lu1 108.6(4) . . ?
C2B N2 Lu1 121.7(4) . . ?
C1D N2 Lu1 104.0(6) . . ?
C5A N3 C6B 59.0(5) . . ?
C5A N3 C11A 113.0(10) . . ?
C6B N3 C11B 116.4(11) . . ?
C5A N3 C6A 105.2(4) . . ?
C11A N3 C6A 105.0(7) . . ?
C6B N3 C5B 102.0(5) . . ?
C11B N3 C5B 103.9(9) . . ?
C5A N3 Lu1 119.8(3) . . ?
C6B N3 Lu1 117.8(4) . . ?
C11A N3 Lu1 111.9(11) . . ?
C11B N3 Lu1 113.7(13) . . ?
C6A N3 Lu1 99.5(2) . . ?
C5B N3 Lu1 99.3(3) . . ?
C10A N4 C12A 113.2(4) . . ?
C10A N4 C8A 110.0(5) . . ?
C12A N4 C8A 105.6(4) . . ?
C10B N4 C8B 110.8(6) . . ?
C10B N4 C12B 111.9(5) . . ?
C8B N4 C12B 103.9(5) . . ?
C10B N4 Lu1 113.1(4) . . ?
C10A N4 Lu1 111.2(4) . . ?
C12A N4 Lu1 109.9(2) . . ?
C8A N4 Lu1 106.6(3) . . ?
C8B N4 Lu1 107.7(4) . . ?
C12B N4 Lu1 108.9(3) . . ?
C21 B1 C29 111.3(2) . . ?
C21 B1 C13 108.7(2) . . ?
C29 B1 C13 108.06(19) . . ?
C21 B1 C37 109.2(2) . . ?
C29 B1 C37 107.72(19) . . ?
C13 B1 C37 111.8(2) . . ?
N1 C1A Lu1 73.3(5) . . ?
N1 C1A H1A 116.2 . . ?
Lu1 C1A H1A 116.2 . . ?
N1 C1A H1B 116.2 . . ?
Lu1 C1A H1B 116.2 . . ?
H1A C1A H1B 113.2 . . ?
N1 C1B H1C 109.5 . . ?
N1 C1B H1D 109.5 . . ?
N1 C1B H1E 109.5 . . ?
N1 C2A H2A 109.5 . . ?
N1 C2A H2B 109.5 . . ?
N1 C2A H2C 109.5 . . ?
N2 C3A H3A 109.5 . . ?
N2 C3A H3B 109.5 . . ?
N2 C3A H3C 109.5 . . ?
N2 C4A H4A 109.5 . . ?
N2 C4A H4B 109.5 . . ?
N2 C4A H4C 109.5 . . ?
N3 C5A H5A 109.5 . . ?
N3 C5A H5B 109.5 . . ?
N3 C5A H5C 109.5 . . ?
N3 C6A H6A 109.5 . . ?
N3 C6A H6B 109.5 . . ?
N3 C6A H6C 109.5 . . ?
N1 C7A C8A 111.0(6) . . ?
N1 C7A H7A 109.4 . . ?
C8A C7A H7A 109.4 . . ?
N1 C7A H7B 109.4 . . ?
C8A C7A H7B 109.4 . . ?
H7A C7A H7B 108.0 . . ?
C7A C8A N4 114.9(6) . . ?
C7A C8A H8A 108.5 . . ?
N4 C8A H8A 108.5 . . ?
C7A C8A H8B 108.5 . . ?
N4 C8A H8B 108.5 . . ?
H8A C8A H8B 107.5 . . ?
N2 C9A C10A 113.0(7) . . ?
N2 C9A H9A 109.0 . . ?
C10A C9A H9A 109.0 . . ?
N2 C9A H9B 109.0 . . ?
C10A C9A H9B 109.0 . . ?
H9A C9A H9B 107.8 . . ?
N4 C10A C9A 111.9(7) . . ?
N4 C10A H10A 109.2 . . ?
C9A C10A H10A 109.2 . . ?
N4 C10A H10B 109.2 . . ?
C9A C10A H10B 109.2 . . ?
H10A C10A H10B 107.9 . . ?
N3 C11A C12A 115.8(16) . . ?
N3 C11A H11A 108.3 . . ?
C12A C11A H11A 108.3 . . ?
N3 C11A H11B 108.3 . . ?
C12A C11A H11B 108.3 . . ?
H11A C11A H11B 107.4 . . ?
N4 C12A C11A 108.3(9) . . ?
N4 C12A H12A 110.0 . . ?
C11A C12A H12A 110.0 . . ?
N4 C12A H12B 110.0 . . ?
C11A C12A H12B 110.0 . . ?
H12A C12A H12B 108.4 . . ?
N2 C1C Lu1 73.6(7) . . ?
N2 C1C H1F 116.2 . . ?
Lu1 C1C H1F 116.2 . . ?
N2 C1C H1G 116.2 . . ?
Lu1 C1C H1G 116.2 . . ?
H1F C1C H1G 113.2 . . ?
N2 C1D H1H 109.5 . . ?
N2 C1D H1I 109.5 . . ?
H1H C1D H1I 109.5 . . ?
N2 C1D H1J 109.5 . . ?
H1H C1D H1J 109.5 . . ?
H1I C1D H1J 109.5 . . ?
N2 C2B H2D 109.5 . . ?
N2 C2B H2E 109.5 . . ?
H2D C2B H2E 109.5 . . ?
N2 C2B H2F 109.5 . . ?
H2D C2B H2F 109.5 . . ?
H2E C2B H2F 109.5 . . ?
N1 C3B H3D 109.5 . . ?
N1 C3B H3E 109.5 . . ?
H3D C3B H3E 109.5 . . ?
N1 C3B H3F 109.5 . . ?
H3D C3B H3F 109.5 . . ?
H3E C3B H3F 109.5 . . ?
N1 C4B H4D 109.5 . . ?
N1 C4B H4E 109.5 . . ?
H4D C4B H4E 109.5 . . ?
N1 C4B H4F 109.5 . . ?
H4D C4B H4F 109.5 . . ?
H4E C4B H4F 109.5 . . ?
N3 C5B H5D 109.5 . . ?
N3 C5B H5E 109.5 . . ?
H5D C5B H5E 109.5 . . ?
N3 C5B H5F 109.5 . . ?
H5D C5B H5F 109.5 . . ?
H5E C5B H5F 109.5 . . ?
N3 C6B H6D 109.5 . . ?
N3 C6B H6E 109.5 . . ?
H6D C6B H6E 109.5 . . ?
N3 C6B H6F 109.5 . . ?
H6D C6B H6F 109.5 . . ?
H6E C6B H6F 109.5 . . ?
N2 C7B C8B 108.3(8) . . ?
N2 C7B H7C 110.0 . . ?
C8B C7B H7C 110.0 . . ?
N2 C7B H7D 110.0 . . ?
C8B C7B H7D 110.0 . . ?
H7C C7B H7D 108.4 . . ?
C7B C8B N4 113.6(8) . . ?
C7B C8B H8C 108.8 . . ?
N4 C8B H8C 108.8 . . ?
C7B C8B H8D 108.8 . . ?
N4 C8B H8D 108.8 . . ?
H8C C8B H8D 107.7 . . ?
C10B C9B N1 115.0(8) . . ?
C10B C9B H9C 108.5 . . ?
N1 C9B H9C 108.5 . . ?
C10B C9B H9D 108.5 . . ?
N1 C9B H9D 108.5 . . ?
H9C C9B H9D 107.5 . . ?
N4 C10B C9B 109.8(7) . . ?
N4 C10B H10C 109.7 . . ?
C9B C10B H10C 109.7 . . ?
N4 C10B H10D 109.7 . . ?
C9B C10B H10D 109.7 . . ?
H10C C10B H10D 108.2 . . ?
C12B C11B N3 114.4(18) . . ?
C12B C11B H11C 108.7 . . ?
N3 C11B H11C 108.7 . . ?
C12B C11B H11D 108.6 . . ?
N3 C11B H11D 108.6 . . ?
H11C C11B H11D 107.6 . . ?
C11B C12B N4 110.5(13) . . ?
C11B C12B H12C 109.5 . . ?
N4 C12B H12C 109.5 . . ?
C11B C12B H12D 109.5 . . ?
N4 C12B H12D 109.5 . . ?
H12C C12B H12D 108.1 . . ?
C14 C13 C18 115.4(2) . . ?
C14 C13 B1 122.7(2) . . ?
C18 C13 B1 121.8(2) . . ?
C15 C14 C13 122.7(2) . . ?
C15 C14 H14 118.6 . . ?
C13 C14 H14 118.6 . . ?
C16 C15 C14 120.8(2) . . ?
C16 C15 C19 120.7(2) . . ?
C14 C15 C19 118.5(2) . . ?
C15 C16 C17 118.0(2) . . ?
C15 C16 H16 121.0 . . ?
C17 C16 H16 121.0 . . ?
C16 C17 C18 120.7(2) . . ?
C16 C17 C20 119.9(3) . . ?
C18 C17 C20 119.3(3) . . ?
C17 C18 C13 122.3(2) . . ?
C17 C18 H18 118.8 . . ?
C13 C18 H18 118.8 . . ?
F2 C19 F1 107.0(3) . . ?
F2 C19 F3 106.0(3) . . ?
F1 C19 F3 104.1(3) . . ?
F2 C19 C15 114.5(3) . . ?
F1 C19 C15 112.6(2) . . ?
F3 C19 C15 111.8(3) . . ?
F4A C20 F6A 108.8(12) . . ?
F5B C20 F4B 108.1(18) . . ?
F5B C20 F6B 101.6(16) . . ?
F4B C20 F6B 102(2) . . ?
F4A C20 F5A 104.4(12) . . ?
F6A C20 F5A 107.3(11) . . ?
F5B C20 C17 113.2(11) . . ?
F4A C20 C17 113.3(8) . . ?
F6A C20 C17 111.2(7) . . ?
F4B C20 C17 114.5(14) . . ?
F6B C20 C17 115.7(12) . . ?
F5A C20 C17 111.4(8) . . ?
C26 C21 C22 114.6(2) . . ?
C26 C21 B1 121.8(2) . . ?
C22 C21 B1 123.5(2) . . ?
C23 C22 C21 122.4(2) . . ?
C23 C22 H22 118.8 . . ?
C21 C22 H22 118.8 . . ?
C24 C23 C22 121.5(2) . . ?
C24 C23 C27 119.8(2) . . ?
C22 C23 C27 118.7(2) . . ?
C23 C24 C25 117.3(2) . . ?
C23 C24 H24 121.3 . . ?
C25 C24 H24 121.3 . . ?
C26 C25 C24 120.8(2) . . ?
C26 C25 C28 118.3(2) . . ?
C24 C25 C28 120.9(2) . . ?
C25 C26 C21 123.3(2) . . ?
C25 C26 H26 118.4 . . ?
C21 C26 H26 118.4 . . ?
F7 C27 F9 107.3(2) . . ?
F7 C27 F8 104.3(2) . . ?
F9 C27 F8 105.9(2) . . ?
F7 C27 C23 113.6(2) . . ?
F9 C27 C23 113.0(2) . . ?
F8 C27 C23 112.0(2) . . ?
F12 C28 F10 107.5(3) . . ?
F12 C28 F11 106.1(2) . . ?
F10 C28 F11 105.2(3) . . ?
F12 C28 C25 113.9(2) . . ?
F10 C28 C25 112.4(2) . . ?
F11 C28 C25 111.4(2) . . ?
C30 C29 C34 115.5(2) . . ?
C30 C29 B1 122.0(2) . . ?
C34 C29 B1 122.2(2) . . ?
C29 C30 C31 122.7(2) . . ?
C29 C30 H30 118.6 . . ?
C31 C30 H30 118.6 . . ?
C32 C31 C30 120.3(2) . . ?
C32 C31 C35 118.9(2) . . ?
C30 C31 C35 120.7(2) . . ?
C33 C32 C31 118.2(2) . . ?
C33 C32 H32 120.9 . . ?
C31 C32 H32 120.9 . . ?
C32 C33 C34 121.0(2) . . ?
C32 C33 C36 119.5(2) . . ?
C34 C33 C36 119.5(2) . . ?
C33 C34 C29 122.2(2) . . ?
C33 C34 H34 118.9 . . ?
C29 C34 H34 118.9 . . ?
F15 C35 F13 106.8(2) . . ?
F15 C35 F14 106.2(2) . . ?
F13 C35 F14 104.8(2) . . ?
F15 C35 C31 113.3(2) . . ?
F13 C35 C31 113.5(2) . . ?
F14 C35 C31 111.5(2) . . ?
F17 C36 F18 107.2(3) . . ?
F17 C36 F16 106.3(3) . . ?
F18 C36 F16 105.2(2) . . ?
F17 C36 C33 112.6(2) . . ?
F18 C36 C33 112.2(3) . . ?
F16 C36 C33 112.8(2) . . ?
C38 C37 C42 115.0(2) . . ?
C38 C37 B1 123.6(2) . . ?
C42 C37 B1 121.3(2) . . ?
C39 C38 C37 122.5(2) . . ?
C39 C38 H38 118.7 . . ?
C37 C38 H38 118.7 . . ?
C40 C39 C38 120.9(3) . . ?
C40 C39 C43 118.6(2) . . ?
C38 C39 C43 120.3(3) . . ?
C41 C40 C39 117.8(2) . . ?
C41 C40 H40 121.1 . . ?
C39 C40 H40 121.1 . . ?
C40 C41 C42 120.9(3) . . ?
C40 C41 C44 119.9(3) . . ?
C42 C41 C44 119.2(3) . . ?
C41 C42 C37 122.8(3) . . ?
C41 C42 H42 118.6 . . ?
C37 C42 H42 118.6 . . ?
F21 C43 F20 107.1(2) . . ?
F21 C43 F19 106.0(3) . . ?
F20 C43 F19 105.3(2) . . ?
F21 C43 C39 113.8(2) . . ?
F20 C43 C39 112.6(3) . . ?
F19 C43 C39 111.5(2) . . ?
F22B C44 F23B 116.8(11) . . ?
F24A C44 F22A 111.1(5) . . ?
F24A C44 F23A 104.8(4) . . ?
F22A C44 F23A 102.8(3) . . ?
F22B C44 F24B 94.5(11) . . ?
F23B C44 F24B 101.3(9) . . ?
F22B C44 C41 121.3(9) . . ?
F23B C44 C41 113.9(5) . . ?
F24A C44 C41 114.3(3) . . ?
F22A C44 C41 112.2(4) . . ?
F23A C44 C41 110.8(3) . . ?
F24B C44 C41 102.9(4) . . ?
C46 C45 H45A 109.5 . . ?
C46 C45 H45B 109.5 . . ?
H45A C45 H45B 109.5 . . ?
C46 C45 H45C 109.5 . . ?
H45A C45 H45C 109.5 . . ?
H45B C45 H45C 109.5 . . ?
O1 C46 C45 112.5(3) . . ?
O1 C46 H46A 109.1 . . ?
C45 C46 H46A 109.1 . . ?
O1 C46 H46B 109.1 . . ?
C45 C46 H46B 109.1 . . ?
H46A C46 H46B 107.8 . . ?
O1 C47 C48 112.4(3) . . ?
O1 C47 H47A 109.1 . . ?
C48 C47 H47A 109.1 . . ?
O1 C47 H47B 109.1 . . ?
C48 C47 H47B 109.1 . . ?
H47A C47 H47B 107.9 . . ?
C47 C48 H48A 109.5 . . ?
C47 C48 H48B 109.5 . . ?
H48A C48 H48B 109.5 . . ?
C47 C48 H48C 109.5 . . ?
H48A C48 H48C 109.5 . . ?
H48B C48 H48C 109.5 . . ?
 
loop_
 _geom_torsion_atom_site_label_1
 _geom_torsion_atom_site_label_2
 _geom_torsion_atom_site_label_3
 _geom_torsion_atom_site_label_4
 _geom_torsion
 _geom_torsion_site_symmetry_1
 _geom_torsion_site_symmetry_2
 _geom_torsion_site_symmetry_3
 _geom_torsion_site_symmetry_4
 _geom_torsion_publ_flag
N2 Lu1 N1 C1A -48.5(5) . . . . ?
C1C Lu1 N1 C1A -24.3(6) . . . . ?
N3 Lu1 N1 C1A -167.3(5) . . . . ?
N4 Lu1 N1 C1A -105.0(5) . . . . ?
Lu1 Lu1 N1 C1A 80.2(5) 2_656 . . . ?
C1A Lu1 N1 C7A 111.3(6) . . . . ?
N2 Lu1 N1 C7A 62.8(4) . . . . ?
C1C Lu1 N1 C7A 87.0(5) . . . . ?
N3 Lu1 N1 C7A -55.9(4) . . . . ?
N4 Lu1 N1 C7A 6.3(4) . . . . ?
Lu1 Lu1 N1 C7A -168.5(4) 2_656 . . . ?
C1A Lu1 N1 C4B -156.0(7) . . . . ?
N2 Lu1 N1 C4B 155.5(4) . . . . ?
C1C Lu1 N1 C4B 179.8(6) . . . . ?
N3 Lu1 N1 C4B 36.8(4) . . . . ?
N4 Lu1 N1 C4B 99.0(4) . . . . ?
Lu1 Lu1 N1 C4B -75.7(4) 2_656 . . . ?
C1A Lu1 N1 C3B -30.9(7) . . . . ?
N2 Lu1 N1 C3B -79.4(4) . . . . ?
C1C Lu1 N1 C3B -55.2(6) . . . . ?
N3 Lu1 N1 C3B 161.8(4) . . . . ?
N4 Lu1 N1 C3B -135.9(4) . . . . ?
Lu1 Lu1 N1 C3B 49.3(4) 2_656 . . . ?
C1A Lu1 N1 C2A -111.2(7) . . . . ?
N2 Lu1 N1 C2A -159.7(4) . . . . ?
C1C Lu1 N1 C2A -135.5(6) . . . . ?
N3 Lu1 N1 C2A 81.5(4) . . . . ?
N4 Lu1 N1 C2A 143.8(4) . . . . ?
Lu1 Lu1 N1 C2A -31.0(4) 2_656 . . . ?
C1A Lu1 N1 C9B 87.3(7) . . . . ?
N2 Lu1 N1 C9B 38.7(5) . . . . ?
C1C Lu1 N1 C9B 63.0(6) . . . . ?
N3 Lu1 N1 C9B -80.0(5) . . . . ?
N4 Lu1 N1 C9B -17.8(5) . . . . ?
Lu1 Lu1 N1 C9B 167.5(5) 2_656 . . . ?
C1A Lu1 N1 C1B -2.8(9) . . . . ?
N2 Lu1 N1 C1B -51.3(6) . . . . ?
C1C Lu1 N1 C1B -27.1(7) . . . . ?
N3 Lu1 N1 C1B -170.1(6) . . . . ?
N4 Lu1 N1 C1B -107.9(6) . . . . ?
Lu1 Lu1 N1 C1B 77.4(6) 2_656 . . . ?
C1A Lu1 N2 C1C 24.4(8) . . . . ?
N1 Lu1 N2 C1C 49.1(7) . . . . ?
N3 Lu1 N2 C1C 168.6(7) . . . . ?
N4 Lu1 N2 C1C 105.6(7) . . . . ?
Lu1 Lu1 N2 C1C -79.3(7) 2_656 . . . ?
C1A Lu1 N2 C4A 177.4(4) . . . . ?
N1 Lu1 N2 C4A -157.8(3) . . . . ?
C1C Lu1 N2 C4A 153.0(8) . . . . ?
N3 Lu1 N2 C4A -38.4(4) . . . . ?
N4 Lu1 N2 C4A -101.4(4) . . . . ?
Lu1 Lu1 N2 C4A 73.7(4) 2_656 . . . ?
C1A Lu1 N2 C3A 56.3(4) . . . . ?
N1 Lu1 N2 C3A 81.1(3) . . . . ?
C1C Lu1 N2 C3A 31.9(8) . . . . ?
N3 Lu1 N2 C3A -159.5(3) . . . . ?
N4 Lu1 N2 C3A 137.5(4) . . . . ?
Lu1 Lu1 N2 C3A -47.4(3) 2_656 . . . ?
C1A Lu1 N2 C7B -92.4(6) . . . . ?
N1 Lu1 N2 C7B -67.6(5) . . . . ?
C1C Lu1 N2 C7B -116.7(9) . . . . ?
N3 Lu1 N2 C7B 51.9(5) . . . . ?
N4 Lu1 N2 C7B -11.1(5) . . . . ?
Lu1 Lu1 N2 C7B 164.0(5) 2_656 . . . ?
C1A Lu1 N2 C9A -62.4(5) . . . . ?
N1 Lu1 N2 C9A -37.6(4) . . . . ?
C1C Lu1 N2 C9A -86.8(8) . . . . ?
N3 Lu1 N2 C9A 81.8(4) . . . . ?
N4 Lu1 N2 C9A 18.9(4) . . . . ?
Lu1 Lu1 N2 C9A -166.0(4) 2_656 . . . ?
C1A Lu1 N2 C2B 136.3(5) . . . . ?
N1 Lu1 N2 C2B 161.1(5) . . . . ?
C1C Lu1 N2 C2B 111.9(9) . . . . ?
N3 Lu1 N2 C2B -79.5(5) . . . . ?
N4 Lu1 N2 C2B -142.4(5) . . . . ?
Lu1 Lu1 N2 C2B 32.7(5) 2_656 . . . ?
C1A Lu1 N2 C1D 23.8(7) . . . . ?
N1 Lu1 N2 C1D 48.5(7) . . . . ?
C1C Lu1 N2 C1D -0.6(11) . . . . ?
N3 Lu1 N2 C1D 168.0(7) . . . . ?
N4 Lu1 N2 C1D 105.0(7) . . . . ?
Lu1 Lu1 N2 C1D -79.9(7) 2_656 . . . ?
C1A Lu1 N3 C5A -164.7(5) . . . . ?
N2 Lu1 N3 C5A 80.0(4) . . . . ?
N1 Lu1 N3 C5A -153.7(4) . . . . ?
C1C Lu1 N3 C5A 89.1(7) . . . . ?
N4 Lu1 N3 C5A 143.6(4) . . . . ?
Lu1 Lu1 N3 C5A -36.9(4) 2_656 . . . ?
C1A Lu1 N3 C6B -96.3(6) . . . . ?
N2 Lu1 N3 C6B 148.3(5) . . . . ?
N1 Lu1 N3 C6B -85.4(5) . . . . ?
C1C Lu1 N3 C6B 157.5(7) . . . . ?
N4 Lu1 N3 C6B -148.1(5) . . . . ?
Lu1 Lu1 N3 C6B 31.4(5) 2_656 . . . ?
C1A Lu1 N3 C11A 59.7(8) . . . . ?
N2 Lu1 N3 C11A -55.7(7) . . . . ?
N1 Lu1 N3 C11A 70.6(7) . . . . ?
C1C Lu1 N3 C11A -46.5(9) . . . . ?
N4 Lu1 N3 C11A 7.9(7) . . . . ?
Lu1 Lu1 N3 C11A -172.6(7) 2_656 . . . ?
C1A Lu1 N3 C11B 45.0(10) . . . . ?
N2 Lu1 N3 C11B -70.3(9) . . . . ?
N1 Lu1 N3 C11B 56.0(9) . . . . ?
C1C Lu1 N3 C11B -61.2(10) . . . . ?
N4 Lu1 N3 C11B -6.7(9) . . . . ?
Lu1 Lu1 N3 C11B 172.8(9) 2_656 . . . ?
C1A Lu1 N3 C6A -50.9(5) . . . . ?
N2 Lu1 N3 C6A -166.2(2) . . . . ?
N1 Lu1 N3 C6A -39.9(3) . . . . ?
C1C Lu1 N3 C6A -157.1(6) . . . . ?
N4 Lu1 N3 C6A -102.6(3) . . . . ?
Lu1 Lu1 N3 C6A 76.9(2) 2_656 . . . ?
C1A Lu1 N3 C5B 154.7(5) . . . . ?
N2 Lu1 N3 C5B 39.4(3) . . . . ?
N1 Lu1 N3 C5B 165.7(3) . . . . ?
C1C Lu1 N3 C5B 48.5(7) . . . . ?
N4 Lu1 N3 C5B 103.0(3) . . . . ?
Lu1 Lu1 N3 C5B -77.5(3) 2_656 . . . ?
C1A Lu1 N4 C10B -43.1(5) . . . . ?
N2 Lu1 N4 C10B -139.1(5) . . . . ?
N1 Lu1 N4 C10B -10.2(4) . . . . ?
C1C Lu1 N4 C10B -107.5(6) . . . . ?
N3 Lu1 N4 C10B 106.2(5) . . . . ?
N2 Lu1 N4 C10A 9.0(4) . . . . ?
N1 Lu1 N4 C10A 137.9(4) . . . . ?
C1C Lu1 N4 C10A 40.6(5) . . . . ?
N3 Lu1 N4 C10A -105.7(4) . . . . ?
C1A Lu1 N4 C12A -128.8(4) . . . . ?
N2 Lu1 N4 C12A 135.1(3) . . . . ?
N1 Lu1 N4 C12A -95.9(3) . . . . ?
C1C Lu1 N4 C12A 166.8(5) . . . . ?
N3 Lu1 N4 C12A 20.4(3) . . . . ?
C1A Lu1 N4 C8A -14.9(4) . . . . ?
N2 Lu1 N4 C8A -110.9(3) . . . . ?
N1 Lu1 N4 C8A 18.0(3) . . . . ?
C1C Lu1 N4 C8A -79.2(5) . . . . ?
N3 Lu1 N4 C8A 134.4(3) . . . . ?
C1A Lu1 N4 C8B 79.7(5) . . . . ?
N2 Lu1 N4 C8B -16.4(5) . . . . ?
N1 Lu1 N4 C8B 112.6(5) . . . . ?
C1C Lu1 N4 C8B 15.3(6) . . . . ?
N3 Lu1 N4 C8B -131.1(5) . . . . ?
C1A Lu1 N4 C12B -168.2(4) . . . . ?
N2 Lu1 N4 C12B 95.7(4) . . . . ?
N1 Lu1 N4 C12B -135.3(4) . . . . ?
C1C Lu1 N4 C12B 127.4(5) . . . . ?
N3 Lu1 N4 C12B -19.0(4) . . . . ?
C7A N1 C1A Lu1 -112.2(5) . . . . ?
C4B N1 C1A Lu1 94.6(16) . . . . ?
C3B N1 C1A Lu1 142.7(7) . . . . ?
C2A N1 C1A Lu1 119.4(4) . . . . ?
C9B N1 C1A Lu1 -105.9(5) . . . . ?
C1B N1 C1A Lu1 173(2) . . . . ?
N2 Lu1 C1A N1 138.4(4) . . . . ?
C1C Lu1 C1A N1 152.8(7) . . . . ?
N3 Lu1 C1A N1 19.1(7) . . . . ?
N4 Lu1 C1A N1 67.4(4) . . . . ?
Lu1 Lu1 C1A N1 -109.4(4) 2_656 . . . ?
C1A N1 C7A C8A 52.5(9) . . . . ?
C4B N1 C7A C8A -137.7(8) . . . . ?
C3B N1 C7A C8A 110.1(7) . . . . ?
C2A N1 C7A C8A -174.6(6) . . . . ?
C9B N1 C7A C8A 37.4(14) . . . . ?
C1B N1 C7A C8A 77.8(10) . . . . ?
Lu1 N1 C7A C8A -30.7(8) . . . . ?
N1 C7A C8A N4 50.3(9) . . . . ?
C10B N4 C8A C7A 65.9(13) . . . . ?
C10A N4 C8A C7A -163.2(6) . . . . ?
C12A N4 C8A C7A 74.4(7) . . . . ?
C8B N4 C8A C7A -150.8(7) . . . . ?
C12B N4 C8A C7A 100.0(8) . . . . ?
Lu1 N4 C8A C7A -42.5(6) . . . . ?
C1C N2 C9A C10A -119.5(10) . . . . ?
C4A N2 C9A C10A 71.1(8) . . . . ?
C3A N2 C9A C10A -168.6(7) . . . . ?
C7B N2 C9A C10A 65.7(13) . . . . ?
C2B N2 C9A C10A 114.2(8) . . . . ?
C1D N2 C9A C10A -148.1(10) . . . . ?
Lu1 N2 C9A C10A -46.0(7) . . . . ?
C10B N4 C10A C9A 107.3(9) . . . . ?
C12A N4 C10A C9A -160.2(6) . . . . ?
C8A N4 C10A C9A 82.0(8) . . . . ?
C8B N4 C10A C9A 50.3(16) . . . . ?
C12B N4 C10A C9A -142.6(8) . . . . ?
Lu1 N4 C10A C9A -35.9(8) . . . . ?
N2 C9A C10A N4 57.2(9) . . . . ?
C5A N3 C11A C12A -175.3(9) . . . . ?
C6B N3 C11A C12A 117.4(14) . . . . ?
C11B N3 C11A C12A 64(9) . . . . ?
C6A N3 C11A C12A 70.5(14) . . . . ?
C5B N3 C11A C12A -137.0(12) . . . . ?
Lu1 N3 C11A C12A -36.5(13) . . . . ?
C10B N4 C12A C11A -155.0(11) . . . . ?
C10A N4 C12A C11A 80.7(11) . . . . ?
C8A N4 C12A C11A -158.9(10) . . . . ?
C8B N4 C12A C11A 97.2(12) . . . . ?
C12B N4 C12A C11A 51.1(11) . . . . ?
Lu1 N4 C12A C11A -44.3(10) . . . . ?
N3 C11A C12A N4 56.2(14) . . . . ?
C4A N2 C1C Lu1 -94.4(16) . . . . ?
C3A N2 C1C Lu1 -141.0(9) . . . . ?
C7B N2 C1C Lu1 111.6(6) . . . . ?
C9A N2 C1C Lu1 108.7(4) . . . . ?
C2B N2 C1C Lu1 -117.8(5) . . . . ?
C1D N2 C1C Lu1 179(2) . . . . ?
C1A Lu1 C1C N2 -152.6(8) . . . . ?
N1 Lu1 C1C N2 -137.8(6) . . . . ?
N3 Lu1 C1C N2 -16.4(10) . . . . ?
N4 Lu1 C1C N2 -67.1(6) . . . . ?
Lu1 Lu1 C1C N2 110.3(6) 2_656 . . . ?
C1C N2 C7B C8B -49.3(12) . . . . ?
C4A N2 C7B C8B 141.8(9) . . . . ?
C3A N2 C7B C8B -109.1(8) . . . . ?
C9A N2 C7B C8B -43.3(11) . . . . ?
C2B N2 C7B C8B 175.3(8) . . . . ?
C1D N2 C7B C8B -78.2(11) . . . . ?
Lu1 N2 C7B C8B 36.8(9) . . . . ?
N2 C7B C8B N4 -54.0(11) . . . . ?
C10B N4 C8B C7B 167.5(9) . . . . ?
C10A N4 C8B C7B -59.1(17) . . . . ?
C12A N4 C8B C7B -98.7(10) . . . . ?
C8A N4 C8B C7B 150.5(9) . . . . ?
C12B N4 C8B C7B -72.1(9) . . . . ?
Lu1 N4 C8B C7B 43.3(9) . . . . ?
C1A N1 C9B C10B 119.1(9) . . . . ?
C7A N1 C9B C10B -74.4(17) . . . . ?
C4B N1 C9B C10B -69.2(9) . . . . ?
C3B N1 C9B C10B 168.5(7) . . . . ?
C2A N1 C9B C10B -114.1(9) . . . . ?
C1B N1 C9B C10B 143.9(11) . . . . ?
Lu1 N1 C9B C10B 46.5(8) . . . . ?
C10A N4 C10B C9B -105.6(8) . . . . ?
C12A N4 C10B C9B 143.9(8) . . . . ?
C8A N4 C10B C9B -44.4(10) . . . . ?
C8B N4 C10B C9B -84.1(9) . . . . ?
C12B N4 C10B C9B 160.5(7) . . . . ?
Lu1 N4 C10B C9B 37.0(8) . . . . ?
N1 C9B C10B N4 -58.8(10) . . . . ?
C5A N3 C11B C12B -115.7(18) . . . . ?
C6B N3 C11B C12B 176.7(13) . . . . ?
C11A N3 C11B C12B -50(9) . . . . ?
C6A N3 C11B C12B 135.9(17) . . . . ?
C5B N3 C11B C12B -72.1(19) . . . . ?
Lu1 N3 C11B C12B 35(2) . . . . ?
N3 C11B C12B N4 -53.7(19) . . . . ?
C10B N4 C12B C11B -81.8(12) . . . . ?
C10A N4 C12B C11B 153.3(12) . . . . ?
C12A N4 C12B C11B -54.2(11) . . . . ?
C8A N4 C12B C11B -97.9(12) . . . . ?
C8B N4 C12B C11B 158.6(12) . . . . ?
Lu1 N4 C12B C11B 44.0(11) . . . . ?
C21 B1 C13 C14 84.0(3) . . . . ?
C29 B1 C13 C14 -155.1(2) . . . . ?
C37 B1 C13 C14 -36.7(3) . . . . ?
C21 B1 C13 C18 -91.2(3) . . . . ?
C29 B1 C13 C18 29.7(3) . . . . ?
C37 B1 C13 C18 148.2(2) . . . . ?
C18 C13 C14 C15 -1.5(4) . . . . ?
B1 C13 C14 C15 -177.0(2) . . . . ?
C13 C14 C15 C16 1.0(4) . . . . ?
C13 C14 C15 C19 -179.0(2) . . . . ?
C14 C15 C16 C17 0.8(4) . . . . ?
C19 C15 C16 C17 -179.2(3) . . . . ?
C15 C16 C17 C18 -2.0(4) . . . . ?
C15 C16 C17 C20 176.5(3) . . . . ?
C16 C17 C18 C13 1.5(4) . . . . ?
C20 C17 C18 C13 -177.0(3) . . . . ?
C14 C13 C18 C17 0.3(4) . . . . ?
B1 C13 C18 C17 175.8(2) . . . . ?
C16 C15 C19 F2 0.1(4) . . . . ?
C14 C15 C19 F2 -179.9(3) . . . . ?
C16 C15 C19 F1 -122.5(3) . . . . ?
C14 C15 C19 F1 57.5(4) . . . . ?
C16 C15 C19 F3 120.7(3) . . . . ?
C14 C15 C19 F3 -59.3(3) . . . . ?
C16 C17 C20 F5B 14(3) . . . . ?
C18 C17 C20 F5B -168(3) . . . . ?
C16 C17 C20 F4A 155.5(14) . . . . ?
C18 C17 C20 F4A -26.0(15) . . . . ?
C16 C17 C20 F6A -81.6(10) . . . . ?
C18 C17 C20 F6A 96.9(10) . . . . ?
C16 C17 C20 F4B 138(2) . . . . ?
C18 C17 C20 F4B -43(2) . . . . ?
C16 C17 C20 F6B -103(3) . . . . ?
C18 C17 C20 F6B 76(3) . . . . ?
C16 C17 C20 F5A 38.1(12) . . . . ?
C18 C17 C20 F5A -143.4(11) . . . . ?
C29 B1 C21 C26 45.7(3) . . . . ?
C13 B1 C21 C26 164.6(2) . . . . ?
C37 B1 C21 C26 -73.1(3) . . . . ?
C29 B1 C21 C22 -137.3(2) . . . . ?
C13 B1 C21 C22 -18.4(3) . . . . ?
C37 B1 C21 C22 103.9(3) . . . . ?
C26 C21 C22 C23 0.9(3) . . . . ?
B1 C21 C22 C23 -176.3(2) . . . . ?
C21 C22 C23 C24 0.4(4) . . . . ?
C21 C22 C23 C27 -179.9(2) . . . . ?
C22 C23 C24 C25 -0.7(4) . . . . ?
C27 C23 C24 C25 179.5(2) . . . . ?
C23 C24 C25 C26 -0.3(4) . . . . ?
C23 C24 C25 C28 -179.4(2) . . . . ?
C24 C25 C26 C21 1.7(4) . . . . ?
C28 C25 C26 C21 -179.2(2) . . . . ?
C22 C21 C26 C25 -2.0(4) . . . . ?
B1 C21 C26 C25 175.3(2) . . . . ?
C24 C23 C27 F7 -107.2(3) . . . . ?
C22 C23 C27 F7 73.0(3) . . . . ?
C24 C23 C27 F9 15.4(4) . . . . ?
C22 C23 C27 F9 -164.4(2) . . . . ?
C24 C23 C27 F8 134.9(3) . . . . ?
C22 C23 C27 F8 -44.8(4) . . . . ?
C26 C25 C28 F12 168.0(2) . . . . ?
C24 C25 C28 F12 -12.9(4) . . . . ?
C26 C25 C28 F10 -69.6(3) . . . . ?
C24 C25 C28 F10 109.6(3) . . . . ?
C26 C25 C28 F11 48.1(3) . . . . ?
C24 C25 C28 F11 -132.8(3) . . . . ?
C21 B1 C29 C30 -159.4(2) . . . . ?
C13 B1 C29 C30 81.3(3) . . . . ?
C37 B1 C29 C30 -39.7(3) . . . . ?
C21 B1 C29 C34 26.4(3) . . . . ?
C13 B1 C29 C34 -92.9(3) . . . . ?
C37 B1 C29 C34 146.1(2) . . . . ?
C34 C29 C30 C31 0.8(4) . . . . ?
B1 C29 C30 C31 -173.7(2) . . . . ?
C29 C30 C31 C32 -0.5(4) . . . . ?
C29 C30 C31 C35 -177.1(2) . . . . ?
C30 C31 C32 C33 -0.5(4) . . . . ?
C35 C31 C32 C33 176.2(2) . . . . ?
C31 C32 C33 C34 1.0(4) . . . . ?
C31 C32 C33 C36 179.4(3) . . . . ?
C32 C33 C34 C29 -0.7(4) . . . . ?
C36 C33 C34 C29 -179.1(3) . . . . ?
C30 C29 C34 C33 -0.2(4) . . . . ?
B1 C29 C34 C33 174.3(2) . . . . ?
C32 C31 C35 F15 32.3(4) . . . . ?
C30 C31 C35 F15 -151.1(3) . . . . ?
C32 C31 C35 F13 154.5(2) . . . . ?
C30 C31 C35 F13 -28.9(4) . . . . ?
C32 C31 C35 F14 -87.5(3) . . . . ?
C30 C31 C35 F14 89.1(3) . . . . ?
C32 C33 C36 F17 22.9(4) . . . . ?
C34 C33 C36 F17 -158.7(3) . . . . ?
C32 C33 C36 F18 -98.1(3) . . . . ?
C34 C33 C36 F18 80.2(3) . . . . ?
C32 C33 C36 F16 143.2(3) . . . . ?
C34 C33 C36 F16 -38.4(4) . . . . ?
C21 B1 C37 C38 -145.7(2) . . . . ?
C29 B1 C37 C38 93.3(3) . . . . ?
C13 B1 C37 C38 -25.3(3) . . . . ?
C21 B1 C37 C42 38.3(3) . . . . ?
C29 B1 C37 C42 -82.8(3) . . . . ?
C13 B1 C37 C42 158.6(2) . . . . ?
C42 C37 C38 C39 -2.3(4) . . . . ?
B1 C37 C38 C39 -178.6(2) . . . . ?
C37 C38 C39 C40 2.5(4) . . . . ?
C37 C38 C39 C43 -173.9(2) . . . . ?
C38 C39 C40 C41 -0.5(4) . . . . ?
C43 C39 C40 C41 175.9(2) . . . . ?
C39 C40 C41 C42 -1.4(4) . . . . ?
C39 C40 C41 C44 -179.8(3) . . . . ?
C40 C41 C42 C37 1.6(4) . . . . ?
C44 C41 C42 C37 180.0(3) . . . . ?
C38 C37 C42 C41 0.3(4) . . . . ?
B1 C37 C42 C41 176.7(2) . . . . ?
C40 C39 C43 F21 156.7(3) . . . . ?
C38 C39 C43 F21 -26.9(4) . . . . ?
C40 C39 C43 F20 34.6(4) . . . . ?
C38 C39 C43 F20 -149.0(2) . . . . ?
C40 C39 C43 F19 -83.5(3) . . . . ?
C38 C39 C43 F19 92.9(3) . . . . ?
C40 C41 C44 F22B -45.1(15) . . . . ?
C42 C41 C44 F22B 136.5(14) . . . . ?
C40 C41 C44 F23B 167.1(12) . . . . ?
C42 C41 C44 F23B -11.3(13) . . . . ?
C40 C41 C44 F24A 107.3(5) . . . . ?
C42 C41 C44 F24A -71.1(5) . . . . ?
C40 C41 C44 F22A -20.3(5) . . . . ?
C42 C41 C44 F22A 161.3(4) . . . . ?
C40 C41 C44 F23A -134.6(3) . . . . ?
C42 C41 C44 F23A 47.0(4) . . . . ?
C40 C41 C44 F24B 58.4(6) . . . . ?
C42 C41 C44 F24B -120.1(5) . . . . ?
C47 O1 C46 C45 -179.1(4) . . . . ?
C46 O1 C47 C48 179.4(4) . . . . ?
 
_diffrn_measured_fraction_theta_max    0.975
_diffrn_reflns_theta_full              25.00
_diffrn_measured_fraction_theta_full   0.999
_refine_diff_density_max    2.023
_refine_diff_density_min   -1.732
_refine_diff_density_rms    0.095

#==END

 
data_4-Y
 
_audit_creation_method            SHELXL-97
_chemical_name_systematic
;
 ?
;
_chemical_name_common             ?
_chemical_melting_point           ?
_chemical_formula_moiety         
 'C24 H62 N8 Y2, 2(C32 H12 B F24), 2 (C4 H10 O)'
_chemical_formula_sum
 'C96 H106 B2 F48 N8 O2 Y2'
_chemical_formula_weight          2515.33
 
loop_
 _atom_type_symbol
 _atom_type_description
 _atom_type_scat_dispersion_real
 _atom_type_scat_dispersion_imag
 _atom_type_scat_source
 'C'  'C'   0.0033   0.0016
 'International Tables Vol C Tables 4.2.6.8 and 6.1.1.4'
 'H'  'H'   0.0000   0.0000
 'International Tables Vol C Tables 4.2.6.8 and 6.1.1.4'
 'B'  'B'   0.0013   0.0007
 'International Tables Vol C Tables 4.2.6.8 and 6.1.1.4'
 'F'  'F'   0.0171   0.0103
 'International Tables Vol C Tables 4.2.6.8 and 6.1.1.4'
 'N'  'N'   0.0061   0.0033
 'International Tables Vol C Tables 4.2.6.8 and 6.1.1.4'
 'O'  'O'   0.0106   0.0060
 'International Tables Vol C Tables 4.2.6.8 and 6.1.1.4'
 'Y'  'Y'  -2.7962   3.5667
 'International Tables Vol C Tables 4.2.6.8 and 6.1.1.4'
 
_symmetry_cell_setting            triclinic
_symmetry_space_group_name_H-M    'P -1'
_symmetry_space_group_name_Hall   '-P 1'
 
loop_
 _symmetry_equiv_pos_as_xyz
 'x, y, z'
 '-x, -y, -z'
 
_cell_length_a                    12.8104(11)
_cell_length_b                    13.9351(12)
_cell_length_c                    17.2719(14)
_cell_angle_alpha                 69.3026(13)
_cell_angle_beta                  70.1548(14)
_cell_angle_gamma                 80.9762(14)
_cell_volume                      2710.6(4)
_cell_formula_units_Z             1
_cell_measurement_temperature     100(2)
_cell_measurement_reflns_used     4665
_cell_measurement_theta_min       1.3
_cell_measurement_theta_max       26.5
 
_exptl_crystal_description        block
_exptl_crystal_colour             colourless
_exptl_crystal_size_max           0.29
_exptl_crystal_size_mid           0.26
_exptl_crystal_size_min           0.23
_exptl_crystal_density_meas       ?
_exptl_crystal_density_diffrn     1.541
_exptl_crystal_density_method     'not measured'
_exptl_crystal_F_000              1274
_exptl_absorpt_coefficient_mu     1.198
_exptl_absorpt_correction_type    multi-scan
_exptl_absorpt_correction_T_min   0.7226
_exptl_absorpt_correction_T_max   0.7701
_exptl_absorpt_process_details    'Bruker Mulabs'
 
_exptl_special_details
;
 ?
;
 
_diffrn_ambient_temperature       100(2)
_diffrn_radiation_wavelength      0.71073
_diffrn_radiation_type            MoK\a
_diffrn_radiation_source          'INCOATEC microsource' 
_diffrn_radiation_monochromator   'multilayer optics'
_diffrn_measurement_device_type   'APEX Area Detector' 
_diffrn_measurement_method        'omega scans'
_diffrn_detector_area_resol_mean  ?
_diffrn_standards_number          ?
_diffrn_standards_interval_count  ?
_diffrn_standards_interval_time   ?
_diffrn_standards_decay_%         ?
_diffrn_reflns_number             32822
_diffrn_reflns_av_R_equivalents   0.0690
_diffrn_reflns_av_sigmaI/netI     0.1010
_diffrn_reflns_limit_h_min        -16
_diffrn_reflns_limit_h_max        16
_diffrn_reflns_limit_k_min        -17
_diffrn_reflns_limit_k_max        17
_diffrn_reflns_limit_l_min        -21
_diffrn_reflns_limit_l_max        21
_diffrn_reflns_theta_min          1.32
_diffrn_reflns_theta_max          26.51
_reflns_number_total              11195
_reflns_number_gt                 6924
_reflns_threshold_expression      >2sigma(I)
 
_computing_data_collection        'Bruker SMART (2001)'
_computing_cell_refinement        'Bruker SMART (2001)'
_computing_data_reduction         'Bruker SAINT+ (1999)'
_computing_structure_solution     'SIR-92 (Altomare 1992)'
_computing_structure_refinement   'SHELXL-97 (Sheldrick, 1997)'
_computing_molecular_graphics     'ORTEP-III (Farrugia, 1999)'

_refine_special_details
;
 Refinement of F^2^ against ALL reflections.  The weighted R-factor wR and
 goodness of fit S are based on F^2^, conventional R-factors R are based
 on F, with F set to zero for negative F^2^. The threshold expression of
 F^2^ > 2sigma(F^2^) is used only for calculating R-factors(gt) etc. and is
 not relevant to the choice of reflections for refinement.  R-factors based
 on F^2^ are statistically about twice as large as those based on F, and R-
 factors based on ALL data will be even larger.
;
 
_refine_ls_structure_factor_coef  Fsqd
_refine_ls_matrix_type            full
_refine_ls_weighting_scheme       calc
_refine_ls_weighting_details
 'calc w=1/[\s^2^(Fo^2^)+(0.0276P)^2^+0.0000P] where P=(Fo^2^+2Fc^2^)/3'
_atom_sites_solution_primary      direct
_atom_sites_solution_secondary    difmap
_atom_sites_solution_hydrogens    geom
_refine_ls_hydrogen_treatment     constr
_refine_ls_extinction_method      none
_refine_ls_extinction_coef        ?
_refine_ls_number_reflns          11195
_refine_ls_number_parameters      889
_refine_ls_number_restraints      0
_refine_ls_R_factor_all           0.0758
_refine_ls_R_factor_gt            0.0428
_refine_ls_wR_factor_ref          0.0856
_refine_ls_wR_factor_gt           0.0797
_refine_ls_goodness_of_fit_ref    0.832
_refine_ls_restrained_S_all       0.832
_refine_ls_shift/su_max           0.002
_refine_ls_shift/su_mean          0.000
 
loop_
 _atom_site_label
 _atom_site_type_symbol
 _atom_site_fract_x
 _atom_site_fract_y
 _atom_site_fract_z
 _atom_site_U_iso_or_equiv
 _atom_site_adp_type
 _atom_site_occupancy
 _atom_site_symmetry_multiplicity
 _atom_site_calc_flag
 _atom_site_refinement_flags
 _atom_site_disorder_assembly
 _atom_site_disorder_group
Y1 Y 0.52121(2) 0.09299(2) 0.532456(18) 0.03118(9) Uani 1 1 d . . .
H1 H 0.4244 -0.0346 0.5730 0.037 Uiso 0.50 1 d PR C .
H2 H 0.6045 -0.0305 0.4807 0.037 Uiso 0.50 1 d PR . .
H3 H 0.4419 0.0484 0.4695 0.037 Uiso 0.50 1 d PR . .
O1 O 0.80362(19) 0.62827(16) 0.87278(14) 0.0530(6) Uani 1 1 d . . .
N1 N 0.5917(2) 0.24844(18) 0.40496(16) 0.0404(6) Uani 1 1 d . C .
N2 N 0.3579(2) 0.1213(2) 0.65255(17) 0.0417(7) Uani 1 1 d . C .
N3 N 0.6749(2) 0.02522(19) 0.60034(16) 0.0395(6) Uani 1 1 d . C .
N4 N 0.5651(2) 0.2294(2) 0.58491(18) 0.0420(7) Uani 1 1 d . C .
F1 F 0.53007(15) 0.54670(15) 0.21918(13) 0.0745(7) Uani 1 1 d . . .
F2 F 0.63239(15) 0.59357(19) 0.08779(13) 0.0868(8) Uani 1 1 d . . .
F3 F 0.58706(14) 0.69665(14) 0.15977(13) 0.0603(5) Uani 1 1 d . . .
F4A F 0.2459(9) 0.6980(17) -0.0773(9) 0.066(3) Uani 0.68(5) 1 d P A -1
F5A F 0.4038(12) 0.6188(11) -0.0959(10) 0.077(3) Uani 0.68(5) 1 d P A -1
F6A F 0.3910(9) 0.7827(9) -0.1331(5) 0.067(3) Uani 0.68(5) 1 d P A -1
F4B F 0.252(3) 0.667(5) -0.066(3) 0.102(13) Uani 0.32(5) 1 d P A -2
F5B F 0.424(3) 0.651(4) -0.115(2) 0.075(9) Uani 0.32(5) 1 d P A -2
F6B F 0.353(6) 0.799(3) -0.1320(17) 0.138(11) Uani 0.32(5) 1 d P A -2
F7 F 0.42234(14) 1.09941(14) 0.01085(11) 0.0549(5) Uani 1 1 d . . .
F8 F 0.47041(13) 1.02170(13) 0.12355(11) 0.0524(5) Uani 1 1 d . . .
F9 F 0.39759(14) 1.17283(13) 0.10582(13) 0.0622(6) Uani 1 1 d . . .
F10 F -0.08509(15) 1.14065(15) 0.20773(13) 0.0648(6) Uani 1 1 d . . .
F11 F -0.07234(15) 1.06468(13) 0.33460(11) 0.0619(6) Uani 1 1 d . . .
F12 F 0.00840(14) 1.20445(13) 0.25738(11) 0.0543(5) Uani 1 1 d . . .
F13 F -0.09184(15) 0.46295(12) 0.28229(11) 0.0497(5) Uani 1 1 d . . .
F14 F -0.24227(16) 0.54214(14) 0.32902(12) 0.0655(6) Uani 1 1 d . . .
F15 F -0.20351(15) 0.51656(12) 0.20728(11) 0.0539(5) Uani 1 1 d . . .
F16 F -0.14175(14) 0.98919(13) 0.05790(10) 0.0477(5) Uani 1 1 d . . .
F17 F -0.24111(16) 0.88318(15) 0.05346(13) 0.0845(8) Uani 1 1 d . . .
F18 F -0.07471(16) 0.90683(13) -0.03172(10) 0.0571(5) Uani 1 1 d . . .
F19 F 0.31178(13) 0.45523(12) 0.47637(11) 0.0448(4) Uani 1 1 d . . .
F20 F 0.15322(15) 0.38962(13) 0.54508(11) 0.0547(5) Uani 1 1 d . . .
F21 F 0.23231(17) 0.39803(12) 0.41216(11) 0.0594(6) Uani 1 1 d . . .
F22A F -0.0484(6) 0.6826(5) 0.6186(4) 0.075(2) Uani 0.728(12) 1 d P B -1
F23A F -0.1085(3) 0.7954(3) 0.5222(2) 0.0470(11) Uani 0.728(12) 1 d P B -1
F24A F 0.0380(4) 0.8237(6) 0.5394(4) 0.080(3) Uani 0.728(12) 1 d P B -1
F22B F -0.0764(18) 0.7017(15) 0.6094(13) 0.103(8) Uani 0.272(12) 1 d P B -2
F23B F -0.035(3) 0.8368(15) 0.5096(8) 0.135(14) Uani 0.272(12) 1 d P B -2
F24B F 0.0688(7) 0.7497(11) 0.5836(8) 0.049(3) Uani 0.272(12) 1 d P B -2
B1 B 0.1471(2) 0.7696(2) 0.21722(18) 0.0203(7) Uani 1 1 d . . .
C1A C 0.4796(11) 0.2563(10) 0.4130(8) 0.041(4) Uiso 0.288(3) 1 d P C -1
H1A H 0.4594 0.2451 0.3665 0.049 Uiso 0.288(3) 1 calc PR C -1
H1B H 0.4355 0.3130 0.4329 0.049 Uiso 0.288(3) 1 calc PR C -1
C1B C 0.4844(14) 0.2893(16) 0.3809(14) 0.046(5) Uiso 0.288(3) 1 d P C -1
H1C H 0.4961 0.3575 0.3369 0.069 Uiso 0.288(3) 1 calc PR C -1
H1D H 0.4242 0.2940 0.4329 0.069 Uiso 0.288(3) 1 calc PR C -1
H1E H 0.4646 0.2424 0.3576 0.069 Uiso 0.288(3) 1 calc PR C -1
C2A C 0.6704(6) 0.2396(6) 0.3172(4) 0.058(2) Uani 0.575(6) 1 d P C -1
H2A H 0.6717 0.3060 0.2715 0.086 Uiso 0.575(6) 1 calc PR C -1
H2B H 0.6441 0.1876 0.3028 0.086 Uiso 0.575(6) 1 calc PR C -1
H2C H 0.7456 0.2195 0.3216 0.086 Uiso 0.575(6) 1 calc PR C -1
C3A C 0.2527(6) 0.1319(7) 0.6309(5) 0.059(2) Uani 0.575(6) 1 d P C -1
H3A H 0.2407 0.0679 0.6242 0.089 Uiso 0.575(6) 1 calc PR C -1
H3B H 0.2577 0.1884 0.5765 0.089 Uiso 0.575(6) 1 calc PR C -1
H3C H 0.1905 0.1465 0.6779 0.089 Uiso 0.575(6) 1 calc PR C -1
C4A C 0.3586(7) 0.0381(6) 0.7265(5) 0.059(2) Uani 0.575(6) 1 d P C -1
H4A H 0.2950 0.0455 0.7756 0.089 Uiso 0.575(6) 1 calc PR C -1
H4B H 0.4277 0.0358 0.7398 0.089 Uiso 0.575(6) 1 calc PR C -1
H4C H 0.3537 -0.0255 0.7162 0.089 Uiso 0.575(6) 1 calc PR C -1
C5A C 0.6763(6) -0.0805(5) 0.6523(4) 0.0460(18) Uani 0.575(6) 1 d P C -1
H5A H 0.7446 -0.0978 0.6689 0.069 Uiso 0.575(6) 1 calc PR C -1
H5B H 0.6735 -0.1235 0.6188 0.069 Uiso 0.575(6) 1 calc PR C -1
H5C H 0.6118 -0.0926 0.7048 0.069 Uiso 0.575(6) 1 calc PR C -1
C6A C 0.7772(5) 0.0366(5) 0.5164(4) 0.0430(17) Uani 0.575(6) 1 d P C -1
H6A H 0.7792 0.1077 0.4775 0.064 Uiso 0.575(6) 1 calc PR C -1
H6B H 0.7706 -0.0093 0.4866 0.064 Uiso 0.575(6) 1 calc PR C -1
H6C H 0.8458 0.0185 0.5325 0.064 Uiso 0.575(6) 1 calc PR C -1
C7A C 0.6343(7) 0.3277(8) 0.4204(6) 0.048(2) Uani 0.575(6) 1 d P C -1
H7A H 0.6260 0.3948 0.3767 0.058 Uiso 0.575(6) 1 calc PR C -1
H7B H 0.7144 0.3131 0.4142 0.058 Uiso 0.575(6) 1 calc PR C -1
C8A C 0.5731(7) 0.3325(6) 0.5095(6) 0.0384(19) Uani 0.575(6) 1 d P C -1
H8A H 0.4968 0.3604 0.5108 0.046 Uiso 0.575(6) 1 calc PR C -1
H8B H 0.6097 0.3816 0.5206 0.046 Uiso 0.575(6) 1 calc PR C -1
C9A C 0.3688(9) 0.2231(7) 0.6612(6) 0.050(2) Uani 0.575(6) 1 d P C -1
H9A H 0.3508 0.2792 0.6126 0.060 Uiso 0.575(6) 1 calc PR C -1
H9B H 0.3142 0.2285 0.7162 0.060 Uiso 0.575(6) 1 calc PR C -1
C10A C 0.4806(14) 0.2366(12) 0.6608(11) 0.045(3) Uani 0.575(6) 1 d P C -1
H10A H 0.4823 0.3046 0.6663 0.054 Uiso 0.575(6) 1 calc PR C -1
H10B H 0.4962 0.1837 0.7121 0.054 Uiso 0.575(6) 1 calc PR C -1
C11A C 0.691(2) 0.089(2) 0.6428(15) 0.047(5) Uani 0.575(6) 1 d P C -1
H11A H 0.7658 0.0739 0.6494 0.057 Uiso 0.575(6) 1 calc PR C -1
H11B H 0.6363 0.0717 0.7020 0.057 Uiso 0.575(6) 1 calc PR C -1
C12A C 0.6778(6) 0.2068(5) 0.5959(5) 0.0355(17) Uani 0.575(6) 1 d P C -1
H12A H 0.6870 0.2460 0.6309 0.043 Uiso 0.575(6) 1 calc PR C -1
H12B H 0.7353 0.2272 0.5384 0.043 Uiso 0.575(6) 1 calc PR C -1
C1C C 0.3226(16) 0.1650(17) 0.5851(12) 0.051(6) Uiso 0.212(3) 1 d P C -2
H1F H 0.3122 0.2407 0.5672 0.062 Uiso 0.212(3) 1 calc PR C -2
H1G H 0.2628 0.1306 0.5820 0.062 Uiso 0.212(3) 1 calc PR C -2
C1D C 0.278(3) 0.1799(18) 0.6050(17) 0.051(7) Uiso 0.212(3) 1 d P C -2
H1H H 0.2479 0.2402 0.6234 0.076 Uiso 0.212(3) 1 calc PR C -2
H1I H 0.2178 0.1360 0.6180 0.076 Uiso 0.212(3) 1 calc PR C -2
H1J H 0.3170 0.2021 0.5423 0.076 Uiso 0.212(3) 1 calc PR C -2
C2B C 0.2912(8) 0.0277(8) 0.7250(6) 0.052(3) Uani 0.425(6) 1 d P C -2
H2D H 0.3368 -0.0131 0.7618 0.078 Uiso 0.425(6) 1 calc PR C -2
H2E H 0.2723 -0.0152 0.6977 0.078 Uiso 0.425(6) 1 calc PR C -2
H2F H 0.2229 0.0529 0.7607 0.078 Uiso 0.425(6) 1 calc PR C -2
C3B C 0.5259(9) 0.2816(8) 0.3459(7) 0.057(3) Uani 0.425(6) 1 d P C -2
H3D H 0.4498 0.2995 0.3767 0.086 Uiso 0.425(6) 1 calc PR C -2
H3E H 0.5248 0.2260 0.3239 0.086 Uiso 0.425(6) 1 calc PR C -2
H3F H 0.5584 0.3418 0.2971 0.086 Uiso 0.425(6) 1 calc PR C -2
C4B C 0.7041(8) 0.2248(8) 0.3677(7) 0.067(3) Uani 0.425(6) 1 d P C -2
H4D H 0.7379 0.2846 0.3190 0.101 Uiso 0.425(6) 1 calc PR C -2
H4E H 0.7103 0.1669 0.3466 0.101 Uiso 0.425(6) 1 calc PR C -2
H4F H 0.7427 0.2063 0.4116 0.101 Uiso 0.425(6) 1 calc PR C -2
C5B C 0.6070(9) -0.0543(8) 0.6906(6) 0.064(3) Uani 0.425(6) 1 d P C -2
H5D H 0.6571 -0.0890 0.7251 0.096 Uiso 0.425(6) 1 calc PR C -2
H5E H 0.5754 -0.1054 0.6788 0.096 Uiso 0.425(6) 1 calc PR C -2
H5F H 0.5469 -0.0172 0.7230 0.096 Uiso 0.425(6) 1 calc PR C -2
C6B C 0.7609(8) -0.0387(9) 0.5629(7) 0.067(3) Uani 0.425(6) 1 d P C -2
H6D H 0.7962 -0.0013 0.5014 0.100 Uiso 0.425(6) 1 calc PR C -2
H6E H 0.7290 -0.1008 0.5678 0.100 Uiso 0.425(6) 1 calc PR C -2
H6F H 0.8165 -0.0577 0.5937 0.100 Uiso 0.425(6) 1 calc PR C -2
C7B C 0.3785(12) 0.1790(11) 0.7064(8) 0.059(4) Uani 0.425(6) 1 d P C -2
H7C H 0.4154 0.1330 0.7489 0.071 Uiso 0.425(6) 1 calc PR C -2
H7D H 0.3077 0.2070 0.7384 0.071 Uiso 0.425(6) 1 calc PR C -2
C8B C 0.4547(19) 0.2669(15) 0.6393(14) 0.049(4) Uani 0.425(6) 1 d P C -2
H8C H 0.4142 0.3132 0.5996 0.059 Uiso 0.425(6) 1 calc PR C -2
H8D H 0.4711 0.3073 0.6706 0.059 Uiso 0.425(6) 1 calc PR C -2
C9B C 0.5777(12) 0.3366(12) 0.4430(11) 0.067(5) Uani 0.425(6) 1 d P C -2
H9C H 0.6153 0.3974 0.3963 0.080 Uiso 0.425(6) 1 calc PR C -2
H9D H 0.4977 0.3558 0.4631 0.080 Uiso 0.425(6) 1 calc PR C -2
C10B C 0.6241(9) 0.3095(11) 0.5174(11) 0.067(5) Uani 0.425(6) 1 d P C -2
H10C H 0.7038 0.2884 0.4989 0.080 Uiso 0.425(6) 1 calc PR C -2
H10D H 0.6172 0.3697 0.5368 0.080 Uiso 0.425(6) 1 calc PR C -2
C11B C 0.714(3) 0.104(3) 0.6255(19) 0.034(5) Uani 0.425(6) 1 d P C -2
H11C H 0.7479 0.0680 0.6726 0.041 Uiso 0.425(6) 1 calc PR C -2
H11D H 0.7729 0.1442 0.5748 0.041 Uiso 0.425(6) 1 calc PR C -2
C12B C 0.6273(8) 0.1746(9) 0.6544(8) 0.056(3) Uani 0.425(6) 1 d P C -2
H12C H 0.6596 0.2269 0.6652 0.067 Uiso 0.425(6) 1 calc PR C -2
H12D H 0.5735 0.1366 0.7099 0.067 Uiso 0.425(6) 1 calc PR C -2
C13 C 0.2550(2) 0.72555(18) 0.15319(15) 0.0187(6) Uani 1 1 d . . .
C14 C 0.3545(2) 0.69241(18) 0.17230(16) 0.0228(6) Uani 1 1 d . . .
H14 H 0.3589 0.6926 0.2260 0.027 Uiso 1 1 calc R . .
C15 C 0.4474(2) 0.65911(19) 0.11667(17) 0.0245(6) Uani 1 1 d . . .
C16 C 0.4452(2) 0.65932(19) 0.03743(17) 0.0268(7) Uani 1 1 d . . .
H16 H 0.5085 0.6362 -0.0008 0.032 Uiso 1 1 calc R . .
C17 C 0.3489(2) 0.6940(2) 0.01466(17) 0.0279(7) Uani 1 1 d . A .
C18 C 0.2560(2) 0.72525(19) 0.07175(16) 0.0240(6) Uani 1 1 d . . .
H18 H 0.1904 0.7473 0.0551 0.029 Uiso 1 1 calc R . .
C19 C 0.5490(2) 0.6234(2) 0.1442(2) 0.0371(8) Uani 1 1 d . . .
C20 C 0.3461(3) 0.7010(3) -0.0734(2) 0.0448(9) Uani 1 1 d . . .
C21 C 0.1631(2) 0.89174(19) 0.19750(15) 0.0195(6) Uani 1 1 d . . .
C22 C 0.2650(2) 0.93895(19) 0.15405(15) 0.0211(6) Uani 1 1 d . . .
H22 H 0.3282 0.8999 0.1313 0.025 Uiso 1 1 calc R . .
C23 C 0.2775(2) 1.0410(2) 0.14283(16) 0.0231(6) Uani 1 1 d . . .
C24 C 0.1889(2) 1.1012(2) 0.17472(16) 0.0245(6) Uani 1 1 d . . .
H24 H 0.1977 1.1706 0.1675 0.029 Uiso 1 1 calc R . .
C25 C 0.0865(2) 1.0569(2) 0.21777(16) 0.0234(6) Uani 1 1 d . . .
C26 C 0.0745(2) 0.95575(19) 0.22677(15) 0.0221(6) Uani 1 1 d . . .
H26 H 0.0025 0.9288 0.2542 0.027 Uiso 1 1 calc R . .
C27 C 0.3900(2) 1.0844(2) 0.09556(19) 0.0339(7) Uani 1 1 d . . .
C28 C -0.0129(2) 1.1169(2) 0.25293(19) 0.0340(7) Uani 1 1 d . . .
C29 C 0.0355(2) 0.75388(19) 0.19727(15) 0.0191(6) Uani 1 1 d . . .
C30 C -0.0157(2) 0.66031(19) 0.23421(15) 0.0206(6) Uani 1 1 d . . .
H30 H 0.0105 0.6067 0.2763 0.025 Uiso 1 1 calc R . .
C31 C -0.1037(2) 0.64197(19) 0.21201(15) 0.0211(6) Uani 1 1 d . . .
C32 C -0.1452(2) 0.7181(2) 0.15219(15) 0.0244(6) Uani 1 1 d . . .
H32 H -0.2052 0.7061 0.1366 0.029 Uiso 1 1 calc R . .
C33 C -0.0968(2) 0.8128(2) 0.11531(16) 0.0248(6) Uani 1 1 d . . .
C34 C -0.0083(2) 0.8293(2) 0.13769(15) 0.0226(6) Uani 1 1 d . . .
H34 H 0.0234 0.8948 0.1111 0.027 Uiso 1 1 calc R . .
C35 C -0.1587(2) 0.5421(2) 0.25621(19) 0.0325(7) Uani 1 1 d . . .
C36 C -0.1392(3) 0.8973(2) 0.04949(19) 0.0383(8) Uani 1 1 d . . .
C37 C 0.1328(2) 0.70656(19) 0.32145(16) 0.0206(6) Uani 1 1 d . . .
C38 C 0.1734(2) 0.6060(2) 0.35155(16) 0.0244(6) Uani 1 1 d . . .
H38 H 0.2131 0.5722 0.3104 0.029 Uiso 1 1 calc R . .
C39 C 0.1584(2) 0.5531(2) 0.43936(17) 0.0269(7) Uani 1 1 d . . .
C40 C 0.0981(2) 0.5984(2) 0.50167(17) 0.0318(7) Uani 1 1 d . . .
H40 H 0.0873 0.5625 0.5617 0.038 Uiso 1 1 calc R . .
C41 C 0.0543(2) 0.6966(2) 0.47445(17) 0.0301(7) Uani 1 1 d . B .
C42 C 0.0728(2) 0.7496(2) 0.38619(16) 0.0253(6) Uani 1 1 d . . .
H42 H 0.0432 0.8180 0.3693 0.030 Uiso 1 1 calc R . .
C43 C 0.2125(3) 0.4504(2) 0.46741(19) 0.0366(8) Uani 1 1 d . . .
C44 C -0.0116(3) 0.7480(3) 0.5398(2) 0.0454(9) Uani 1 1 d . . .
C45 C 0.9091(4) 0.6304(3) 0.9615(3) 0.0850(13) Uani 1 1 d . . .
H45A H 0.9685 0.6737 0.9162 0.127 Uiso 1 1 calc R . .
H45B H 0.9379 0.5840 1.0080 0.127 Uiso 1 1 calc R . .
H45C H 0.8478 0.6739 0.9853 0.127 Uiso 1 1 calc R . .
C46 C 0.8687(4) 0.5699(3) 0.9237(3) 0.0789(13) Uani 1 1 d . . .
H46A H 0.9331 0.5390 0.8879 0.095 Uiso 1 1 calc R . .
H46B H 0.8249 0.5133 0.9713 0.095 Uiso 1 1 calc R . .
C47 C 0.7612(4) 0.5746(3) 0.8363(3) 0.0813(13) Uani 1 1 d . . .
H47A H 0.7164 0.5183 0.8833 0.098 Uiso 1 1 calc R . .
H47B H 0.8235 0.5435 0.7990 0.098 Uiso 1 1 calc R . .
C48 C 0.6924(3) 0.6407(3) 0.7845(2) 0.0730(12) Uani 1 1 d . . .
H48A H 0.6371 0.6793 0.8186 0.110 Uiso 1 1 calc R . .
H48B H 0.6545 0.5986 0.7681 0.110 Uiso 1 1 calc R . .
H48C H 0.7393 0.6887 0.7318 0.110 Uiso 1 1 calc R . .
 
loop_
 _atom_site_aniso_label
 _atom_site_aniso_U_11
 _atom_site_aniso_U_22
 _atom_site_aniso_U_33
 _atom_site_aniso_U_23
 _atom_site_aniso_U_13
 _atom_site_aniso_U_12
Y1 0.03546(18) 0.03220(18) 0.03317(18) -0.01601(14) -0.01018(14) -0.00974(13)
O1 0.0715(17) 0.0366(14) 0.0478(14) -0.0174(12) -0.0096(13) -0.0039(12)
N1 0.0429(18) 0.0260(15) 0.0462(17) -0.0107(13) -0.0052(14) -0.0059(13)
N2 0.0363(16) 0.0443(17) 0.0483(18) -0.0264(15) -0.0043(14) -0.0045(13)
N3 0.0489(17) 0.0409(17) 0.0412(16) -0.0208(14) -0.0233(14) 0.0024(14)
N4 0.0321(16) 0.0501(18) 0.0604(19) -0.0337(16) -0.0177(15) -0.0024(14)
F1 0.0500(13) 0.0683(14) 0.0825(15) 0.0204(12) -0.0376(12) -0.0061(11)
F2 0.0434(13) 0.156(2) 0.0866(16) -0.0819(16) -0.0291(12) 0.0481(14)
F3 0.0433(12) 0.0640(13) 0.0920(15) -0.0294(12) -0.0389(11) -0.0026(10)
F4A 0.033(4) 0.145(8) 0.032(3) -0.044(4) -0.006(3) -0.015(3)
F5A 0.107(7) 0.086(5) 0.056(6) -0.053(4) -0.017(4) 0.001(4)
F6A 0.091(6) 0.091(7) 0.018(3) 0.002(3) -0.017(4) -0.047(4)
F4B 0.100(16) 0.19(3) 0.059(12) -0.060(16) -0.029(9) -0.051(14)
F5B 0.052(9) 0.15(2) 0.036(10) -0.058(14) -0.017(8) 0.037(12)
F6B 0.28(3) 0.088(10) 0.066(12) 0.012(8) -0.111(17) -0.02(2)
F7 0.0403(11) 0.0824(15) 0.0342(11) -0.0094(10) -0.0008(9) -0.0275(10)
F8 0.0326(10) 0.0519(12) 0.0685(13) -0.0028(10) -0.0230(10) -0.0126(9)
F9 0.0472(12) 0.0454(12) 0.0927(15) -0.0347(11) 0.0034(11) -0.0250(9)
F10 0.0479(12) 0.0876(16) 0.0839(15) -0.0576(13) -0.0353(11) 0.0326(11)
F11 0.0631(13) 0.0491(12) 0.0477(12) -0.0193(10) 0.0179(10) -0.0013(10)
F12 0.0564(12) 0.0418(11) 0.0686(13) -0.0373(10) -0.0034(10) -0.0025(9)
F13 0.0629(13) 0.0257(10) 0.0677(13) 0.0012(9) -0.0425(11) -0.0096(9)
F14 0.0635(13) 0.0549(13) 0.0589(13) -0.0156(10) 0.0177(11) -0.0381(10)
F15 0.0794(14) 0.0375(11) 0.0626(12) -0.0002(9) -0.0506(11) -0.0250(10)
F16 0.0585(12) 0.0361(11) 0.0459(11) -0.0023(9) -0.0285(9) 0.0075(9)
F17 0.0646(14) 0.0719(15) 0.1025(17) 0.0435(12) -0.0682(13) -0.0363(12)
F18 0.0964(15) 0.0497(12) 0.0217(10) 0.0037(9) -0.0269(10) -0.0096(11)
F19 0.0405(11) 0.0374(11) 0.0608(12) -0.0101(9) -0.0272(9) -0.0007(8)
F20 0.0594(12) 0.0409(11) 0.0444(11) 0.0182(9) -0.0202(10) -0.0136(9)
F21 0.1116(17) 0.0265(10) 0.0549(12) -0.0122(9) -0.0487(12) 0.0059(10)
F22A 0.057(3) 0.113(4) 0.016(2) -0.003(2) -0.001(2) 0.041(3)
F23A 0.056(3) 0.046(2) 0.0403(19) -0.0217(16) -0.0149(16) 0.0124(17)
F24A 0.068(3) 0.122(7) 0.069(4) -0.077(5) 0.020(2) -0.045(4)
F22B 0.077(12) 0.095(12) 0.114(16) -0.077(12) 0.064(10) -0.047(10)
F23B 0.25(3) 0.113(17) 0.047(7) -0.056(9) -0.076(13) 0.13(2)
F24B 0.068(6) 0.049(7) 0.048(6) -0.035(6) -0.021(5) 0.004(5)
B1 0.0215(17) 0.0223(17) 0.0174(16) -0.0041(13) -0.0074(13) -0.0043(13)
C2A 0.056(5) 0.068(5) 0.032(4) -0.012(4) -0.001(3) 0.004(4)
C3A 0.023(4) 0.074(7) 0.080(6) -0.029(5) -0.011(4) -0.002(4)
C4A 0.067(6) 0.056(5) 0.046(4) -0.006(4) -0.013(5) -0.015(4)
C5A 0.055(5) 0.047(4) 0.035(4) -0.006(3) -0.019(4) -0.004(4)
C6A 0.043(4) 0.040(4) 0.042(4) -0.012(3) -0.007(3) -0.008(3)
C7A 0.061(6) 0.040(5) 0.039(6) 0.001(4) -0.015(5) -0.023(5)
C8A 0.040(5) 0.021(4) 0.062(5) -0.017(4) -0.020(5) -0.005(4)
C9A 0.044(5) 0.057(7) 0.062(7) -0.047(5) -0.003(5) -0.001(5)
C10A 0.055(9) 0.048(8) 0.049(6) -0.027(6) -0.025(5) 0.002(6)
C11A 0.050(12) 0.047(8) 0.053(9) -0.005(6) -0.029(8) -0.018(7)
C12A 0.036(4) 0.039(4) 0.046(4) -0.022(3) -0.020(3) -0.005(3)
C2B 0.041(6) 0.063(6) 0.040(5) -0.011(4) 0.008(5) -0.020(5)
C3B 0.070(8) 0.036(5) 0.048(7) 0.003(5) -0.014(6) -0.002(5)
C4B 0.058(7) 0.062(7) 0.066(8) -0.021(6) -0.001(6) 0.002(5)
C5B 0.073(8) 0.071(7) 0.062(7) -0.027(6) -0.029(6) -0.012(6)
C6B 0.058(7) 0.085(9) 0.075(9) -0.047(7) -0.033(6) 0.027(7)
C7B 0.043(7) 0.081(11) 0.065(9) -0.053(8) 0.002(7) -0.005(7)
C8B 0.046(10) 0.051(12) 0.075(14) -0.055(11) -0.016(7) 0.007(8)
C9B 0.081(11) 0.032(6) 0.070(10) -0.020(6) 0.016(10) -0.035(8)
C10B 0.022(6) 0.065(9) 0.147(13) -0.080(9) -0.022(7) 0.007(6)
C11B 0.029(9) 0.046(12) 0.042(11) -0.023(10) -0.014(7) -0.016(7)
C12B 0.032(6) 0.083(8) 0.081(8) -0.063(7) -0.013(5) -0.006(5)
C13 0.0227(15) 0.0159(14) 0.0184(14) -0.0045(11) -0.0064(12) -0.0060(11)
C14 0.0256(16) 0.0238(15) 0.0212(15) -0.0087(12) -0.0051(13) -0.0080(12)
C15 0.0200(15) 0.0233(16) 0.0315(17) -0.0103(13) -0.0070(13) -0.0031(12)
C16 0.0247(16) 0.0275(16) 0.0269(16) -0.0149(13) 0.0021(13) -0.0051(13)
C17 0.0302(17) 0.0345(17) 0.0219(15) -0.0120(13) -0.0033(13) -0.0129(14)
C18 0.0227(15) 0.0268(16) 0.0251(15) -0.0069(13) -0.0103(13) -0.0055(12)
C19 0.0258(18) 0.047(2) 0.040(2) -0.0199(17) -0.0071(15) 0.0007(15)
C20 0.033(2) 0.073(3) 0.036(2) -0.030(2) -0.0024(18) -0.011(2)
C21 0.0214(15) 0.0268(16) 0.0122(13) -0.0052(12) -0.0080(11) -0.0027(12)
C22 0.0221(15) 0.0267(16) 0.0184(14) -0.0085(12) -0.0101(12) -0.0003(12)
C23 0.0272(16) 0.0243(16) 0.0208(15) -0.0044(12) -0.0121(12) -0.0059(13)
C24 0.0322(17) 0.0228(15) 0.0242(15) -0.0078(13) -0.0144(13) -0.0042(13)
C25 0.0305(17) 0.0266(16) 0.0166(14) -0.0081(12) -0.0105(13) -0.0013(13)
C26 0.0246(15) 0.0274(16) 0.0156(14) -0.0046(12) -0.0086(12) -0.0051(13)
C27 0.0359(19) 0.0292(18) 0.0373(19) -0.0094(15) -0.0106(16) -0.0073(15)
C28 0.0396(19) 0.0328(19) 0.0329(18) -0.0162(15) -0.0094(16) -0.0012(15)
C29 0.0203(15) 0.0235(15) 0.0131(13) -0.0060(12) -0.0041(11) -0.0016(12)
C30 0.0205(15) 0.0241(15) 0.0169(14) -0.0057(12) -0.0064(12) -0.0009(12)
C31 0.0224(15) 0.0234(15) 0.0185(14) -0.0068(12) -0.0055(12) -0.0054(12)
C32 0.0220(15) 0.0348(17) 0.0183(15) -0.0085(13) -0.0058(12) -0.0074(13)
C33 0.0228(15) 0.0315(17) 0.0161(14) -0.0006(12) -0.0064(12) -0.0059(13)
C34 0.0243(15) 0.0260(16) 0.0153(14) -0.0030(12) -0.0041(12) -0.0085(12)
C35 0.0371(19) 0.0312(18) 0.0338(18) -0.0075(15) -0.0168(16) -0.0078(15)
C36 0.042(2) 0.040(2) 0.0316(19) 0.0058(15) -0.0211(16) -0.0158(16)
C37 0.0191(14) 0.0257(16) 0.0201(15) -0.0061(12) -0.0087(12) -0.0062(12)
C38 0.0268(16) 0.0277(16) 0.0208(15) -0.0070(13) -0.0076(13) -0.0079(13)
C39 0.0299(16) 0.0232(16) 0.0280(17) 0.0004(13) -0.0153(14) -0.0085(13)
C40 0.0352(18) 0.044(2) 0.0163(15) -0.0008(14) -0.0117(14) -0.0152(15)
C41 0.0332(17) 0.0390(19) 0.0211(16) -0.0099(14) -0.0105(13) -0.0044(14)
C42 0.0250(16) 0.0303(16) 0.0213(15) -0.0056(13) -0.0096(13) -0.0043(13)
C43 0.047(2) 0.0329(19) 0.0315(18) -0.0028(15) -0.0176(16) -0.0125(16)
C44 0.052(3) 0.057(3) 0.025(2) -0.0147(19) -0.0052(19) -0.009(2)
C45 0.117(4) 0.073(3) 0.070(3) -0.018(2) -0.042(3) 0.001(3)
C46 0.121(4) 0.048(3) 0.063(3) -0.019(2) -0.033(3) 0.023(3)
C47 0.121(4) 0.043(3) 0.088(3) -0.026(2) -0.034(3) -0.011(3)
C48 0.060(3) 0.095(3) 0.080(3) -0.058(3) -0.004(2) -0.014(2)
 
_geom_special_details
;
 All esds (except the esd in the dihedral angle between two l.s. planes)
 are estimated using the full covariance matrix.  The cell esds are taken
 into account individually in the estimation of esds in distances, angles
 and torsion angles; correlations between esds in cell parameters are only
 used when they are defined by crystal symmetry.  An approximate (isotropic)
 treatment of cell esds is used for estimating esds involving l.s. planes.
;
 
loop_
 _geom_bond_atom_site_label_1
 _geom_bond_atom_site_label_2
 _geom_bond_distance
 _geom_bond_site_symmetry_2
 _geom_bond_publ_flag
Y1 N2 2.492(2) . ?
Y1 N1 2.500(2) . ?
Y1 N3 2.519(2) . ?
Y1 C1C 2.565(19) . ?
Y1 N4 2.579(2) . ?
Y1 C1A 2.602(13) . ?
Y1 Y1 3.3434(6) 2_656 ?
Y1 H1 2.1006 . ?
Y1 H2 2.1822 . ?
Y1 H3 2.0066 . ?
O1 C46 1.382(4) . ?
O1 C47 1.395(4) . ?
N1 C1A 1.386(14) . ?
N1 C4B 1.403(9) . ?
N1 C7A 1.444(11) . ?
N1 C3B 1.447(10) . ?
N1 C1B 1.536(18) . ?
N1 C2A 1.544(6) . ?
N1 C9B 1.548(16) . ?
N2 C1C 1.305(19) . ?
N2 C4A 1.390(7) . ?
N2 C1D 1.49(3) . ?
N2 C3A 1.489(7) . ?
N2 C9A 1.511(10) . ?
N2 C7B 1.532(13) . ?
N2 C2B 1.571(9) . ?
N3 C11A 1.41(2) . ?
N3 C6B 1.428(8) . ?
N3 C5A 1.429(6) . ?
N3 C11B 1.52(3) . ?
N3 C6A 1.568(6) . ?
N3 C5B 1.605(9) . ?
N4 C10B 1.387(15) . ?
N4 C10A 1.412(18) . ?
N4 C12A 1.491(6) . ?
N4 C8B 1.54(2) . ?
N4 C8A 1.549(9) . ?
N4 C12B 1.572(11) . ?
F1 C19 1.330(3) . ?
F2 C19 1.305(3) . ?
F3 C19 1.338(3) . ?
F4A C20 1.316(14) . ?
F5A C20 1.364(13) . ?
F6A C20 1.290(10) . ?
F4B C20 1.31(3) . ?
F5B C20 1.28(3) . ?
F6B C20 1.38(3) . ?
F7 C27 1.325(3) . ?
F8 C27 1.347(3) . ?
F9 C27 1.328(3) . ?
F10 C28 1.336(3) . ?
F11 C28 1.348(3) . ?
F12 C28 1.324(3) . ?
F13 C35 1.330(3) . ?
F14 C35 1.347(3) . ?
F15 C35 1.332(3) . ?
F16 C36 1.333(3) . ?
F17 C36 1.325(3) . ?
F18 C36 1.336(3) . ?
F19 C43 1.347(3) . ?
F20 C43 1.342(3) . ?
F21 C43 1.333(3) . ?
F22A C44 1.314(7) . ?
F23A C44 1.388(6) . ?
F24A C44 1.311(5) . ?
F22B C44 1.222(18) . ?
F23B C44 1.194(14) . ?
F24B C44 1.478(11) . ?
B1 C13 1.639(4) . ?
B1 C29 1.642(4) . ?
B1 C21 1.646(4) . ?
B1 C37 1.660(4) . ?
C1A H1A 0.9900 . ?
C1A H1B 0.9900 . ?
C1B H1C 0.9800 . ?
C1B H1D 0.9800 . ?
C1B H1E 0.9800 . ?
C2A H2A 0.9800 . ?
C2A H2B 0.9800 . ?
C2A H2C 0.9800 . ?
C3A H3A 0.9800 . ?
C3A H3B 0.9800 . ?
C3A H3C 0.9800 . ?
C4A H4A 0.9800 . ?
C4A H4B 0.9800 . ?
C4A H4C 0.9800 . ?
C5A H5A 0.9800 . ?
C5A H5B 0.9800 . ?
C5A H5C 0.9800 . ?
C6A H6A 0.9800 . ?
C6A H6B 0.9800 . ?
C6A H6C 0.9800 . ?
C7A C8A 1.493(14) . ?
C7A H7A 0.9900 . ?
C7A H7B 0.9900 . ?
C8A H8A 0.9900 . ?
C8A H8B 0.9900 . ?
C9A C10A 1.470(19) . ?
C9A H9A 0.9900 . ?
C9A H9B 0.9900 . ?
C10A H10A 0.9900 . ?
C10A H10B 0.9900 . ?
C11A C12A 1.56(3) . ?
C11A H11A 0.9900 . ?
C11A H11B 0.9900 . ?
C12A H12A 0.9900 . ?
C12A H12B 0.9900 . ?
C1C H1F 0.9900 . ?
C1C H1G 0.9900 . ?
C1D H1H 0.9800 . ?
C1D H1I 0.9800 . ?
C1D H1J 0.9800 . ?
C2B H2D 0.9800 . ?
C2B H2E 0.9800 . ?
C2B H2F 0.9800 . ?
C3B H3D 0.9800 . ?
C3B H3E 0.9800 . ?
C3B H3F 0.9800 . ?
C4B H4D 0.9800 . ?
C4B H4E 0.9800 . ?
C4B H4F 0.9800 . ?
C5B H5D 0.9800 . ?
C5B H5E 0.9800 . ?
C5B H5F 0.9800 . ?
C6B H6D 0.9800 . ?
C6B H6E 0.9800 . ?
C6B H6F 0.9800 . ?
C7B C8B 1.55(3) . ?
C7B H7C 0.9900 . ?
C7B H7D 0.9900 . ?
C8B H8C 0.9900 . ?
C8B H8D 0.9900 . ?
C9B C10B 1.50(2) . ?
C9B H9C 0.9900 . ?
C9B H9D 0.9900 . ?
C10B H10C 0.9900 . ?
C10B H10D 0.9900 . ?
C11B C12B 1.44(4) . ?
C11B H11C 0.9900 . ?
C11B H11D 0.9900 . ?
C12B H12C 0.9900 . ?
C12B H12D 0.9900 . ?
C13 C14 1.393(3) . ?
C13 C18 1.404(3) . ?
C14 C15 1.385(3) . ?
C14 H14 0.9500 . ?
C15 C16 1.377(3) . ?
C15 C19 1.489(4) . ?
C16 C17 1.385(4) . ?
C16 H16 0.9500 . ?
C17 C18 1.387(3) . ?
C17 C20 1.502(4) . ?
C18 H18 0.9500 . ?
C21 C26 1.397(3) . ?
C21 C22 1.399(3) . ?
C22 C23 1.393(3) . ?
C22 H22 0.9500 . ?
C23 C24 1.378(3) . ?
C23 C27 1.495(4) . ?
C24 C25 1.387(3) . ?
C24 H24 0.9500 . ?
C25 C26 1.389(3) . ?
C25 C28 1.480(4) . ?
C26 H26 0.9500 . ?
C29 C34 1.386(3) . ?
C29 C30 1.390(3) . ?
C30 C31 1.392(3) . ?
C30 H30 0.9500 . ?
C31 C32 1.377(3) . ?
C31 C35 1.486(3) . ?
C32 C33 1.387(3) . ?
C32 H32 0.9500 . ?
C33 C34 1.389(3) . ?
C33 C36 1.499(4) . ?
C34 H34 0.9500 . ?
C37 C38 1.394(3) . ?
C37 C42 1.395(3) . ?
C38 C39 1.392(3) . ?
C38 H38 0.9500 . ?
C39 C40 1.383(4) . ?
C39 C43 1.481(4) . ?
C40 C41 1.376(4) . ?
C40 H40 0.9500 . ?
C41 C42 1.393(3) . ?
C41 C44 1.496(4) . ?
C42 H42 0.9500 . ?
C45 C46 1.468(5) . ?
C45 H45A 0.9800 . ?
C45 H45B 0.9800 . ?
C45 H45C 0.9800 . ?
C46 H46A 0.9900 . ?
C46 H46B 0.9900 . ?
C47 C48 1.458(5) . ?
C47 H47A 0.9900 . ?
C47 H47B 0.9900 . ?
C48 H48A 0.9800 . ?
C48 H48B 0.9800 . ?
C48 H48C 0.9800 . ?
 
loop_
 _geom_angle_atom_site_label_1
 _geom_angle_atom_site_label_2
 _geom_angle_atom_site_label_3
 _geom_angle
 _geom_angle_site_symmetry_1
 _geom_angle_site_symmetry_3
 _geom_angle_publ_flag
N2 Y1 N1 116.48(8) . . ?
N2 Y1 N3 104.80(9) . . ?
N1 Y1 N3 106.56(9) . . ?
N2 Y1 C1C 29.9(4) . . ?
N1 Y1 C1C 96.7(5) . . ?
N3 Y1 C1C 134.1(4) . . ?
N2 Y1 N4 70.58(8) . . ?
N1 Y1 N4 70.40(9) . . ?
N3 Y1 N4 70.29(8) . . ?
C1C Y1 N4 81.7(5) . . ?
N2 Y1 C1A 95.1(3) . . ?
N1 Y1 C1A 31.4(3) . . ?
N3 Y1 C1A 137.0(3) . . ?
C1C Y1 C1A 69.0(5) . . ?
N4 Y1 C1A 81.6(3) . . ?
N2 Y1 Y1 111.37(6) . 2_656 ?
N1 Y1 Y1 110.79(6) . 2_656 ?
N3 Y1 Y1 106.01(6) . 2_656 ?
C1C Y1 Y1 101.5(5) . 2_656 ?
N4 Y1 Y1 176.26(6) . 2_656 ?
C1A Y1 Y1 101.3(3) . 2_656 ?
N2 Y1 H1 75.9 . . ?
N1 Y1 H1 141.8 . . ?
N3 Y1 H1 104.3 . . ?
C1C Y1 H1 77.0 . . ?
N4 Y1 H1 142.8 . . ?
C1A Y1 H1 117.5 . . ?
Y1 Y1 H1 37.7 2_656 . ?
N2 Y1 H2 139.5 . . ?
N1 Y1 H2 101.6 . . ?
N3 Y1 H2 75.2 . . ?
C1C Y1 H2 138.1 . . ?
N4 Y1 H2 140.0 . . ?
C1A Y1 H2 112.4 . . ?
Y1 Y1 H2 36.6 2_656 . ?
H1 Y1 H2 65.3 . . ?
N2 Y1 H3 99.0 . . ?
N1 Y1 H3 92.6 . . ?
N3 Y1 H3 138.0 . . ?
C1C Y1 H3 77.6 . . ?
N4 Y1 H3 151.4 . . ?
C1A Y1 H3 72.8 . . ?
Y1 Y1 H3 32.2 2_656 . ?
H1 Y1 H3 49.2 . . ?
H2 Y1 H3 64.3 . . ?
C46 O1 C47 115.2(3) . . ?
C1A N1 C4B 154.5(8) . . ?
C1A N1 C7A 116.9(7) . . ?
C4B N1 C7A 84.3(5) . . ?
C4B N1 C3B 115.2(6) . . ?
C7A N1 C3B 117.0(6) . . ?
C4B N1 C1B 141.4(8) . . ?
C7A N1 C1B 109.3(8) . . ?
C1A N1 C2A 115.1(6) . . ?
C7A N1 C2A 106.1(5) . . ?
C3B N1 C2A 74.2(5) . . ?
C1B N1 C2A 100.5(7) . . ?
C1A N1 C9B 91.1(8) . . ?
C4B N1 C9B 111.4(7) . . ?
C3B N1 C9B 105.2(8) . . ?
C1B N1 C9B 88.5(9) . . ?
C2A N1 C9B 128.8(6) . . ?
C1A N1 Y1 78.4(5) . . ?
C4B N1 Y1 105.5(5) . . ?
C7A N1 Y1 117.4(4) . . ?
C3B N1 Y1 113.5(4) . . ?
C1B N1 Y1 99.9(9) . . ?
C2A N1 Y1 121.6(3) . . ?
C9B N1 Y1 105.7(6) . . ?
C4A N2 C1D 138.9(10) . . ?
C4A N2 C3A 112.2(4) . . ?
C1C N2 C9A 92.7(11) . . ?
C4A N2 C9A 113.4(5) . . ?
C1D N2 C9A 84.3(9) . . ?
C3A N2 C9A 105.4(5) . . ?
C1C N2 C7B 124.2(11) . . ?
C4A N2 C7B 81.6(6) . . ?
C1D N2 C7B 111.4(11) . . ?
C3A N2 C7B 123.7(7) . . ?
C1C N2 C2B 116.1(10) . . ?
C1D N2 C2B 104.3(10) . . ?
C9A N2 C2B 127.0(5) . . ?
C7B N2 C2B 102.1(6) . . ?
C4A N2 Y1 106.5(4) . . ?
C1D N2 Y1 102.0(12) . . ?
C3A N2 Y1 111.3(3) . . ?
C9A N2 Y1 108.2(4) . . ?
C7B N2 Y1 116.3(5) . . ?
C2B N2 Y1 120.3(4) . . ?
C11A N3 C6B 124.0(12) . . ?
C11A N3 C5A 111.2(11) . . ?
C6B N3 C11B 115.1(13) . . ?
C5A N3 C11B 119.1(14) . . ?
C11A N3 C6A 107.4(9) . . ?
C5A N3 C6A 106.0(4) . . ?
C11B N3 C6A 93.7(10) . . ?
C11A N3 C5B 92.1(9) . . ?
C6B N3 C5B 102.9(6) . . ?
C11B N3 C5B 105.3(11) . . ?
C11A N3 Y1 112.4(12) . . ?
C6B N3 Y1 117.6(4) . . ?
C5A N3 Y1 118.5(3) . . ?
C11B N3 Y1 113.5(14) . . ?
C6A N3 Y1 100.0(3) . . ?
C5B N3 Y1 99.4(4) . . ?
C10B N4 C10A 126.8(9) . . ?
C10A N4 C12A 113.4(6) . . ?
C10B N4 C8B 112.4(9) . . ?
C12A N4 C8B 132.2(7) . . ?
C10A N4 C8A 110.7(6) . . ?
C12A N4 C8A 105.6(4) . . ?
C8B N4 C8A 90.8(8) . . ?
C10B N4 C12B 112.1(6) . . ?
C10A N4 C12B 80.2(5) . . ?
C8B N4 C12B 102.3(7) . . ?
C8A N4 C12B 136.3(5) . . ?
C10B N4 Y1 113.0(6) . . ?
C10A N4 Y1 110.7(8) . . ?
C12A N4 Y1 109.7(3) . . ?
C8B N4 Y1 107.9(8) . . ?
C8A N4 Y1 106.5(3) . . ?
C12B N4 Y1 108.6(4) . . ?
C13 B1 C29 108.1(2) . . ?
C13 B1 C21 108.6(2) . . ?
C29 B1 C21 111.2(2) . . ?
C13 B1 C37 111.8(2) . . ?
C29 B1 C37 108.2(2) . . ?
C21 B1 C37 108.9(2) . . ?
N1 C1A Y1 70.2(5) . . ?
N1 C1A H1A 116.6 . . ?
Y1 C1A H1A 116.6 . . ?
N1 C1A H1B 116.6 . . ?
Y1 C1A H1B 116.6 . . ?
H1A C1A H1B 113.6 . . ?
N1 C1B H1C 109.5 . . ?
N1 C1B H1D 109.5 . . ?
N1 C1B H1E 109.5 . . ?
N1 C2A H2A 109.5 . . ?
N1 C2A H2B 109.5 . . ?
N1 C2A H2C 109.5 . . ?
N2 C3A H3A 109.5 . . ?
N2 C3A H3B 109.5 . . ?
N2 C3A H3C 109.5 . . ?
N2 C4A H4A 109.5 . . ?
N2 C4A H4B 109.5 . . ?
N2 C4A H4C 109.5 . . ?
N3 C5A H5A 109.5 . . ?
N3 C5A H5B 109.5 . . ?
N3 C5A H5C 109.5 . . ?
N3 C6A H6A 109.5 . . ?
N3 C6A H6B 109.5 . . ?
N3 C6A H6C 109.5 . . ?
N1 C7A C8A 110.3(7) . . ?
N1 C7A H7A 109.6 . . ?
C8A C7A H7A 109.6 . . ?
N1 C7A H7B 109.6 . . ?
C8A C7A H7B 109.6 . . ?
H7A C7A H7B 108.1 . . ?
C7A C8A N4 116.0(7) . . ?
C7A C8A H8A 108.3 . . ?
N4 C8A H8A 108.3 . . ?
C7A C8A H8B 108.3 . . ?
N4 C8A H8B 108.3 . . ?
H8A C8A H8B 107.4 . . ?
C10A C9A N2 113.0(9) . . ?
C10A C9A H9A 109.0 . . ?
N2 C9A H9A 109.0 . . ?
C10A C9A H9B 109.0 . . ?
N2 C9A H9B 109.0 . . ?
H9A C9A H9B 107.8 . . ?
N4 C10A C9A 113.4(11) . . ?
N4 C10A H10A 108.9 . . ?
C9A C10A H10A 108.9 . . ?
N4 C10A H10B 108.9 . . ?
C9A C10A H10B 108.9 . . ?
H10A C10A H10B 107.7 . . ?
N3 C11A C12A 115.1(17) . . ?
N3 C11A H11A 108.5 . . ?
C12A C11A H11A 108.5 . . ?
N3 C11A H11B 108.5 . . ?
C12A C11A H11B 108.5 . . ?
H11A C11A H11B 107.5 . . ?
N4 C12A C11A 108.4(10) . . ?
N4 C12A H12A 110.0 . . ?
C11A C12A H12A 110.0 . . ?
N4 C12A H12B 110.0 . . ?
C11A C12A H12B 110.0 . . ?
H12A C12A H12B 108.4 . . ?
N2 C1C Y1 71.9(9) . . ?
N2 C1C H1F 116.4 . . ?
Y1 C1C H1F 116.4 . . ?
N2 C1C H1G 116.4 . . ?
Y1 C1C H1G 116.4 . . ?
H1F C1C H1G 113.4 . . ?
N2 C1D H1H 109.5 . . ?
N2 C1D H1I 109.5 . . ?
H1H C1D H1I 109.5 . . ?
N2 C1D H1J 109.5 . . ?
H1H C1D H1J 109.5 . . ?
H1I C1D H1J 109.5 . . ?
N2 C2B H2D 109.5 . . ?
N2 C2B H2E 109.5 . . ?
H2D C2B H2E 109.5 . . ?
N2 C2B H2F 109.5 . . ?
H2D C2B H2F 109.5 . . ?
H2E C2B H2F 109.5 . . ?
N1 C3B H3D 109.5 . . ?
N1 C3B H3E 109.5 . . ?
H3D C3B H3E 109.5 . . ?
N1 C3B H3F 109.5 . . ?
H3D C3B H3F 109.5 . . ?
H3E C3B H3F 109.5 . . ?
N1 C4B H4D 109.5 . . ?
N1 C4B H4E 109.5 . . ?
H4D C4B H4E 109.5 . . ?
N1 C4B H4F 109.5 . . ?
H4D C4B H4F 109.5 . . ?
H4E C4B H4F 109.5 . . ?
N3 C5B H5D 109.5 . . ?
N3 C5B H5E 109.5 . . ?
H5D C5B H5E 109.5 . . ?
N3 C5B H5F 109.5 . . ?
H5D C5B H5F 109.5 . . ?
H5E C5B H5F 109.5 . . ?
N3 C6B H6D 109.5 . . ?
N3 C6B H6E 109.5 . . ?
H6D C6B H6E 109.5 . . ?
N3 C6B H6F 109.5 . . ?
H6D C6B H6F 109.5 . . ?
H6E C6B H6F 109.5 . . ?
N2 C7B C8B 105.0(11) . . ?
N2 C7B H7C 110.7 . . ?
C8B C7B H7C 110.7 . . ?
N2 C7B H7D 110.7 . . ?
C8B C7B H7D 110.7 . . ?
H7C C7B H7D 108.8 . . ?
N4 C8B C7B 113.8(13) . . ?
N4 C8B H8C 108.8 . . ?
C7B C8B H8C 108.8 . . ?
N4 C8B H8D 108.8 . . ?
C7B C8B H8D 108.8 . . ?
H8C C8B H8D 107.7 . . ?
C10B C9B N1 113.4(12) . . ?
C10B C9B H9C 108.9 . . ?
N1 C9B H9C 108.9 . . ?
C10B C9B H9D 108.9 . . ?
N1 C9B H9D 108.9 . . ?
H9C C9B H9D 107.7 . . ?
N4 C10B C9B 108.4(9) . . ?
N4 C10B H10C 110.0 . . ?
C9B C10B H10C 110.0 . . ?
N4 C10B H10D 110.0 . . ?
C9B C10B H10D 110.0 . . ?
H10C C10B H10D 108.4 . . ?
C12B C11B N3 114(2) . . ?
C12B C11B H11C 108.8 . . ?
N3 C11B H11C 108.8 . . ?
C12B C11B H11D 108.8 . . ?
N3 C11B H11D 108.8 . . ?
H11C C11B H11D 107.7 . . ?
C11B C12B N4 111.2(14) . . ?
C11B C12B H12C 109.4 . . ?
N4 C12B H12C 109.4 . . ?
C11B C12B H12D 109.4 . . ?
N4 C12B H12D 109.4 . . ?
H12C C12B H12D 108.0 . . ?
C14 C13 C18 115.0(2) . . ?
C14 C13 B1 123.0(2) . . ?
C18 C13 B1 121.8(2) . . ?
C15 C14 C13 123.1(2) . . ?
C15 C14 H14 118.4 . . ?
C13 C14 H14 118.4 . . ?
C16 C15 C14 120.3(2) . . ?
C16 C15 C19 120.9(2) . . ?
C14 C15 C19 118.8(2) . . ?
C15 C16 C17 118.6(2) . . ?
C15 C16 H16 120.7 . . ?
C17 C16 H16 120.7 . . ?
C16 C17 C18 120.4(2) . . ?
C16 C17 C20 119.9(3) . . ?
C18 C17 C20 119.7(3) . . ?
C17 C18 C13 122.5(2) . . ?
C17 C18 H18 118.7 . . ?
C13 C18 H18 118.7 . . ?
F2 C19 F1 107.1(3) . . ?
F2 C19 F3 106.0(2) . . ?
F1 C19 F3 103.7(2) . . ?
F2 C19 C15 114.7(2) . . ?
F1 C19 C15 112.5(2) . . ?
F3 C19 C15 112.0(2) . . ?
F5B C20 F6A 86(2) . . ?
F5B C20 F4B 107(2) . . ?
F6A C20 F4B 124(3) . . ?
F5B C20 F4A 116.8(17) . . ?
F6A C20 F4A 108.0(10) . . ?
F6A C20 F5A 107.3(8) . . ?
F4B C20 F5A 91(2) . . ?
F4A C20 F5A 105.0(10) . . ?
F5B C20 F6B 102.9(17) . . ?
F4B C20 F6B 106(2) . . ?
F4A C20 F6B 89(3) . . ?
F5A C20 F6B 122.4(18) . . ?
F5B C20 C17 116.0(11) . . ?
F6A C20 C17 112.1(5) . . ?
F4B C20 C17 110.0(15) . . ?
F4A C20 C17 114.1(6) . . ?
F5A C20 C17 109.8(6) . . ?
F6B C20 C17 114.5(12) . . ?
C26 C21 C22 114.7(2) . . ?
C26 C21 B1 121.5(2) . . ?
C22 C21 B1 123.8(2) . . ?
C23 C22 C21 122.6(2) . . ?
C23 C22 H22 118.7 . . ?
C21 C22 H22 118.7 . . ?
C24 C23 C22 121.3(2) . . ?
C24 C23 C27 120.2(2) . . ?
C22 C23 C27 118.5(2) . . ?
C23 C24 C25 117.6(2) . . ?
C23 C24 H24 121.2 . . ?
C25 C24 H24 121.2 . . ?
C24 C25 C26 120.6(2) . . ?
C24 C25 C28 120.8(2) . . ?
C26 C25 C28 118.6(2) . . ?
C25 C26 C21 123.2(2) . . ?
C25 C26 H26 118.4 . . ?
C21 C26 H26 118.4 . . ?
F7 C27 F9 107.4(2) . . ?
F7 C27 F8 104.4(2) . . ?
F9 C27 F8 105.3(2) . . ?
F7 C27 C23 113.8(2) . . ?
F9 C27 C23 112.8(2) . . ?
F8 C27 C23 112.4(2) . . ?
F12 C28 F10 106.3(2) . . ?
F12 C28 F11 105.1(2) . . ?
F10 C28 F11 104.4(2) . . ?
F12 C28 C25 114.7(2) . . ?
F10 C28 C25 113.2(2) . . ?
F11 C28 C25 112.3(2) . . ?
C34 C29 C30 115.6(2) . . ?
C34 C29 B1 122.7(2) . . ?
C30 C29 B1 121.5(2) . . ?
C29 C30 C31 122.7(2) . . ?
C29 C30 H30 118.7 . . ?
C31 C30 H30 118.7 . . ?
C32 C31 C30 120.5(2) . . ?
C32 C31 C35 118.9(2) . . ?
C30 C31 C35 120.6(2) . . ?
C31 C32 C33 118.1(2) . . ?
C31 C32 H32 121.0 . . ?
C33 C32 H32 121.0 . . ?
C32 C33 C34 120.6(2) . . ?
C32 C33 C36 119.6(2) . . ?
C34 C33 C36 119.8(2) . . ?
C29 C34 C33 122.5(2) . . ?
C29 C34 H34 118.7 . . ?
C33 C34 H34 118.7 . . ?
F13 C35 F15 106.0(2) . . ?
F13 C35 F14 104.7(2) . . ?
F15 C35 F14 105.7(2) . . ?
F13 C35 C31 114.0(2) . . ?
F15 C35 C31 113.6(2) . . ?
F14 C35 C31 112.0(2) . . ?
F17 C36 F16 106.6(3) . . ?
F17 C36 F18 106.8(2) . . ?
F16 C36 F18 105.2(2) . . ?
F17 C36 C33 112.9(2) . . ?
F16 C36 C33 112.9(2) . . ?
F18 C36 C33 111.8(3) . . ?
C38 C37 C42 115.0(2) . . ?
C38 C37 B1 123.4(2) . . ?
C42 C37 B1 121.5(2) . . ?
C39 C38 C37 122.8(2) . . ?
C39 C38 H38 118.6 . . ?
C37 C38 H38 118.6 . . ?
C40 C39 C38 120.5(3) . . ?
C40 C39 C43 118.7(2) . . ?
C38 C39 C43 120.7(3) . . ?
C41 C40 C39 118.3(2) . . ?
C41 C40 H40 120.8 . . ?
C39 C40 H40 120.8 . . ?
C40 C41 C42 120.5(3) . . ?
C40 C41 C44 119.9(3) . . ?
C42 C41 C44 119.5(3) . . ?
C41 C42 C37 122.8(3) . . ?
C41 C42 H42 118.6 . . ?
C37 C42 H42 118.6 . . ?
F21 C43 F20 106.3(2) . . ?
F21 C43 F19 105.5(2) . . ?
F20 C43 F19 105.0(2) . . ?
F21 C43 C39 113.8(2) . . ?
F20 C43 C39 113.2(3) . . ?
F19 C43 C39 112.4(2) . . ?
F23B C44 F22B 116.0(12) . . ?
F22B C44 F24A 116.2(8) . . ?
F23B C44 F22A 131.4(9) . . ?
F24A C44 F22A 111.6(5) . . ?
F22B C44 F23A 83.0(13) . . ?
F24A C44 F23A 102.9(5) . . ?
F22A C44 F23A 103.1(4) . . ?
F23B C44 F24B 103.3(13) . . ?
F22B C44 F24B 90.7(10) . . ?
F22A C44 F24B 75.2(6) . . ?
F23B C44 C41 114.8(6) . . ?
F22B C44 C41 122.2(9) . . ?
F24A C44 C41 114.3(3) . . ?
F22A C44 C41 112.7(4) . . ?
F23A C44 C41 111.1(3) . . ?
F24B C44 C41 102.9(4) . . ?
C46 C45 H45A 109.5 . . ?
C46 C45 H45B 109.5 . . ?
H45A C45 H45B 109.5 . . ?
C46 C45 H45C 109.5 . . ?
H45A C45 H45C 109.5 . . ?
H45B C45 H45C 109.5 . . ?
O1 C46 C45 112.5(3) . . ?
O1 C46 H46A 109.1 . . ?
C45 C46 H46A 109.1 . . ?
O1 C46 H46B 109.1 . . ?
C45 C46 H46B 109.1 . . ?
H46A C46 H46B 107.8 . . ?
O1 C47 C48 112.1(3) . . ?
O1 C47 H47A 109.2 . . ?
C48 C47 H47A 109.2 . . ?
O1 C47 H47B 109.2 . . ?
C48 C47 H47B 109.2 . . ?
H47A C47 H47B 107.9 . . ?
C47 C48 H48A 109.5 . . ?
C47 C48 H48B 109.5 . . ?
H48A C48 H48B 109.5 . . ?
C47 C48 H48C 109.5 . . ?
H48A C48 H48C 109.5 . . ?
H48B C48 H48C 109.5 . . ?
 
loop_
 _geom_torsion_atom_site_label_1
 _geom_torsion_atom_site_label_2
 _geom_torsion_atom_site_label_3
 _geom_torsion_atom_site_label_4
 _geom_torsion
 _geom_torsion_site_symmetry_1
 _geom_torsion_site_symmetry_2
 _geom_torsion_site_symmetry_3
 _geom_torsion_site_symmetry_4
 _geom_torsion_publ_flag
N2 Y1 N1 C1A -51.3(6) . . . . ?
N3 Y1 N1 C1A -167.8(6) . . . . ?
C1C Y1 N1 C1A -27.8(7) . . . . ?
N4 Y1 N1 C1A -106.5(6) . . . . ?
Y1 Y1 N1 C1A 77.3(6) 2_656 . . . ?
N2 Y1 N1 C4B 154.6(5) . . . . ?
N3 Y1 N1 C4B 38.1(5) . . . . ?
C1C Y1 N1 C4B 178.2(7) . . . . ?
N4 Y1 N1 C4B 99.5(5) . . . . ?
C1A Y1 N1 C4B -154.0(8) . . . . ?
Y1 Y1 N1 C4B -76.7(5) 2_656 . . . ?
N2 Y1 N1 C7A 63.1(5) . . . . ?
N3 Y1 N1 C7A -53.4(5) . . . . ?
C1C Y1 N1 C7A 86.6(6) . . . . ?
N4 Y1 N1 C7A 7.9(5) . . . . ?
C1A Y1 N1 C7A 114.4(7) . . . . ?
Y1 Y1 N1 C7A -168.3(5) 2_656 . . . ?
N2 Y1 N1 C3B -78.4(5) . . . . ?
N3 Y1 N1 C3B 165.1(5) . . . . ?
C1C Y1 N1 C3B -54.8(7) . . . . ?
N4 Y1 N1 C3B -133.5(5) . . . . ?
C1A Y1 N1 C3B -27.0(8) . . . . ?
Y1 Y1 N1 C3B 50.3(5) 2_656 . . . ?
N2 Y1 N1 C1B -54.8(7) . . . . ?
N3 Y1 N1 C1B -171.3(7) . . . . ?
C1C Y1 N1 C1B -31.2(8) . . . . ?
N4 Y1 N1 C1B -109.9(7) . . . . ?
C1A Y1 N1 C1B -3.5(11) . . . . ?
Y1 Y1 N1 C1B 73.8(7) 2_656 . . . ?
N2 Y1 N1 C2A -163.7(4) . . . . ?
N3 Y1 N1 C2A 79.8(4) . . . . ?
C1C Y1 N1 C2A -140.2(6) . . . . ?
N4 Y1 N1 C2A 141.1(4) . . . . ?
C1A Y1 N1 C2A -112.4(7) . . . . ?
Y1 Y1 N1 C2A -35.1(4) 2_656 . . . ?
N2 Y1 N1 C9B 36.5(7) . . . . ?
N3 Y1 N1 C9B -80.0(7) . . . . ?
C1C Y1 N1 C9B 60.0(8) . . . . ?
N4 Y1 N1 C9B -18.7(7) . . . . ?
C1A Y1 N1 C9B 87.8(9) . . . . ?
Y1 Y1 N1 C9B 165.1(7) 2_656 . . . ?
N1 Y1 N2 C1C 52.8(10) . . . . ?
N3 Y1 N2 C1C 170.3(10) . . . . ?
N4 Y1 N2 C1C 107.9(10) . . . . ?
C1A Y1 N2 C1C 28.7(10) . . . . ?
Y1 Y1 N2 C1C -75.5(10) 2_656 . . . ?
N1 Y1 N2 C4A -158.3(4) . . . . ?
N3 Y1 N2 C4A -40.9(4) . . . . ?
C1C Y1 N2 C4A 148.8(11) . . . . ?
N4 Y1 N2 C4A -103.3(4) . . . . ?
C1A Y1 N2 C4A 177.6(5) . . . . ?
Y1 Y1 N2 C4A 73.3(4) 2_656 . . . ?
N1 Y1 N2 C1D 51.7(9) . . . . ?
N3 Y1 N2 C1D 169.2(9) . . . . ?
C1C Y1 N2 C1D -1.1(17) . . . . ?
N4 Y1 N2 C1D 106.8(9) . . . . ?
C1A Y1 N2 C1D 27.6(10) . . . . ?
Y1 Y1 N2 C1D -76.6(9) 2_656 . . . ?
N1 Y1 N2 C3A 79.2(4) . . . . ?
N3 Y1 N2 C3A -163.4(4) . . . . ?
C1C Y1 N2 C3A 26.3(11) . . . . ?
N4 Y1 N2 C3A 134.2(4) . . . . ?
C1A Y1 N2 C3A 55.0(5) . . . . ?
Y1 Y1 N2 C3A -49.2(4) 2_656 . . . ?
N1 Y1 N2 C9A -36.1(4) . . . . ?
N3 Y1 N2 C9A 81.3(4) . . . . ?
C1C Y1 N2 C9A -89.0(11) . . . . ?
N4 Y1 N2 C9A 18.9(4) . . . . ?
C1A Y1 N2 C9A -60.2(5) . . . . ?
Y1 Y1 N2 C9A -164.5(4) 2_656 . . . ?
N1 Y1 N2 C7B -69.7(6) . . . . ?
N3 Y1 N2 C7B 47.8(6) . . . . ?
C1C Y1 N2 C7B -122.5(12) . . . . ?
N4 Y1 N2 C7B -14.6(6) . . . . ?
C1A Y1 N2 C7B -93.8(7) . . . . ?
Y1 Y1 N2 C7B 162.0(6) 2_656 . . . ?
N1 Y1 N2 C2B 166.3(5) . . . . ?
N3 Y1 N2 C2B -76.2(5) . . . . ?
C1C Y1 N2 C2B 113.5(11) . . . . ?
N4 Y1 N2 C2B -138.6(5) . . . . ?
C1A Y1 N2 C2B 142.2(6) . . . . ?
Y1 Y1 N2 C2B 38.0(5) 2_656 . . . ?
N2 Y1 N3 C11A -53.0(9) . . . . ?
N1 Y1 N3 C11A 71.0(9) . . . . ?
C1C Y1 N3 C11A -46.3(11) . . . . ?
N4 Y1 N3 C11A 9.6(9) . . . . ?
C1A Y1 N3 C11A 61.8(10) . . . . ?
Y1 Y1 N3 C11A -170.9(9) 2_656 . . . ?
N2 Y1 N3 C6B 153.3(6) . . . . ?
N1 Y1 N3 C6B -82.7(6) . . . . ?
C1C Y1 N3 C6B 160.0(9) . . . . ?
N4 Y1 N3 C6B -144.1(6) . . . . ?
C1A Y1 N3 C6B -92.0(7) . . . . ?
Y1 Y1 N3 C6B 35.4(6) 2_656 . . . ?
N2 Y1 N3 C5A 78.9(4) . . . . ?
N1 Y1 N3 C5A -157.1(4) . . . . ?
C1C Y1 N3 C5A 85.6(8) . . . . ?
N4 Y1 N3 C5A 141.5(4) . . . . ?
C1A Y1 N3 C5A -166.3(6) . . . . ?
Y1 Y1 N3 C5A -39.0(4) 2_656 . . . ?
N2 Y1 N3 C11B -68.1(11) . . . . ?
N1 Y1 N3 C11B 55.9(11) . . . . ?
C1C Y1 N3 C11B -61.4(13) . . . . ?
N4 Y1 N3 C11B -5.5(11) . . . . ?
C1A Y1 N3 C11B 46.6(11) . . . . ?
Y1 Y1 N3 C11B 174.0(11) 2_656 . . . ?
N2 Y1 N3 C6A -166.6(3) . . . . ?
N1 Y1 N3 C6A -42.6(3) . . . . ?
C1C Y1 N3 C6A -159.9(7) . . . . ?
N4 Y1 N3 C6A -104.0(3) . . . . ?
C1A Y1 N3 C6A -51.9(5) . . . . ?
Y1 Y1 N3 C6A 75.5(3) 2_656 . . . ?
N2 Y1 N3 C5B 43.2(4) . . . . ?
N1 Y1 N3 C5B 167.3(4) . . . . ?
C1C Y1 N3 C5B 49.9(8) . . . . ?
N4 Y1 N3 C5B 105.8(4) . . . . ?
C1A Y1 N3 C5B 158.0(6) . . . . ?
Y1 Y1 N3 C5B -74.7(4) 2_656 . . . ?
N2 Y1 N4 C10B -140.5(5) . . . . ?
N1 Y1 N4 C10B -11.6(5) . . . . ?
N3 Y1 N4 C10B 105.1(5) . . . . ?
C1C Y1 N4 C10B -111.9(7) . . . . ?
C1A Y1 N4 C10B -42.0(6) . . . . ?
N2 Y1 N4 C10A 8.3(5) . . . . ?
N1 Y1 N4 C10A 137.2(5) . . . . ?
N3 Y1 N4 C10A -106.1(5) . . . . ?
C1C Y1 N4 C10A 36.9(6) . . . . ?
C1A Y1 N4 C10A 106.8(5) . . . . ?
N2 Y1 N4 C12A 134.1(4) . . . . ?
N1 Y1 N4 C12A -97.0(3) . . . . ?
N3 Y1 N4 C12A 19.7(3) . . . . ?
C1C Y1 N4 C12A 162.8(6) . . . . ?
C1A Y1 N4 C12A -127.4(5) . . . . ?
N2 Y1 N4 C8B -15.6(7) . . . . ?
N1 Y1 N4 C8B 113.2(7) . . . . ?
N3 Y1 N4 C8B -130.1(7) . . . . ?
C1C Y1 N4 C8B 13.0(8) . . . . ?
C1A Y1 N4 C8B 82.8(8) . . . . ?
N2 Y1 N4 C8A -112.0(4) . . . . ?
N1 Y1 N4 C8A 16.8(3) . . . . ?
N3 Y1 N4 C8A 133.5(4) . . . . ?
C1C Y1 N4 C8A -83.4(6) . . . . ?
C1A Y1 N4 C8A -13.6(5) . . . . ?
N2 Y1 N4 C12B 94.5(5) . . . . ?
N1 Y1 N4 C12B -136.6(5) . . . . ?
N3 Y1 N4 C12B -19.9(4) . . . . ?
C1C Y1 N4 C12B 123.2(6) . . . . ?
C1A Y1 N4 C12B -167.0(5) . . . . ?
C4B N1 C1A Y1 101.6(15) . . . . ?
C7A N1 C1A Y1 -114.9(5) . . . . ?
C3B N1 C1A Y1 143.1(9) . . . . ?
C1B N1 C1A Y1 171(3) . . . . ?
C2A N1 C1A Y1 119.6(4) . . . . ?
C9B N1 C1A Y1 -105.8(6) . . . . ?
N2 Y1 C1A N1 135.4(5) . . . . ?
N3 Y1 C1A N1 17.3(8) . . . . ?
C1C Y1 C1A N1 150.3(8) . . . . ?
N4 Y1 C1A N1 66.0(5) . . . . ?
Y1 Y1 C1A N1 -111.6(5) 2_656 . . . ?
C1A N1 C7A C8A 57.9(11) . . . . ?
C4B N1 C7A C8A -137.0(10) . . . . ?
C3B N1 C7A C8A 107.6(9) . . . . ?
C1B N1 C7A C8A 80.2(12) . . . . ?
C2A N1 C7A C8A -172.2(7) . . . . ?
C9B N1 C7A C8A 37.7(18) . . . . ?
Y1 N1 C7A C8A -32.5(9) . . . . ?
N1 C7A C8A N4 51.6(10) . . . . ?
C10B N4 C8A C7A 65.7(16) . . . . ?
C10A N4 C8A C7A -163.0(9) . . . . ?
C12A N4 C8A C7A 73.9(8) . . . . ?
C8B N4 C8A C7A -151.6(11) . . . . ?
C12B N4 C8A C7A 99.5(10) . . . . ?
Y1 N4 C8A C7A -42.6(8) . . . . ?
C1C N2 C9A C10A -124.9(13) . . . . ?
C4A N2 C9A C10A 71.3(11) . . . . ?
C1D N2 C9A C10A -147.2(15) . . . . ?
C3A N2 C9A C10A -165.6(10) . . . . ?
C7B N2 C9A C10A 64.3(15) . . . . ?
C2B N2 C9A C10A 109.1(11) . . . . ?
Y1 N2 C9A C10A -46.5(10) . . . . ?
C10B N4 C10A C9A 107.1(14) . . . . ?
C12A N4 C10A C9A -160.1(8) . . . . ?
C8B N4 C10A C9A 51(3) . . . . ?
C8A N4 C10A C9A 81.5(13) . . . . ?
C12B N4 C10A C9A -142.6(12) . . . . ?
Y1 N4 C10A C9A -36.4(11) . . . . ?
N2 C9A C10A N4 58.3(13) . . . . ?
C6B N3 C11A C12A 113.4(17) . . . . ?
C5A N3 C11A C12A -173.8(12) . . . . ?
C11B N3 C11A C12A 59(10) . . . . ?
C6A N3 C11A C12A 70.7(17) . . . . ?
C5B N3 C11A C12A -139.4(15) . . . . ?
Y1 N3 C11A C12A -38.3(17) . . . . ?
C10B N4 C12A C11A -154.5(12) . . . . ?
C10A N4 C12A C11A 80.3(13) . . . . ?
C8B N4 C12A C11A 95.8(15) . . . . ?
C8A N4 C12A C11A -158.3(11) . . . . ?
C12B N4 C12A C11A 51.1(11) . . . . ?
Y1 N4 C12A C11A -44.0(11) . . . . ?
N3 C11A C12A N4 57.5(17) . . . . ?
C4A N2 C1C Y1 -102.5(15) . . . . ?
C1D N2 C1C Y1 177(4) . . . . ?
C3A N2 C1C Y1 -141.8(15) . . . . ?
C9A N2 C1C Y1 108.0(4) . . . . ?
C7B N2 C1C Y1 113.9(8) . . . . ?
C2B N2 C1C Y1 -118.1(6) . . . . ?
N1 Y1 C1C N2 -134.1(8) . . . . ?
N3 Y1 C1C N2 -13.1(13) . . . . ?
N4 Y1 C1C N2 -65.1(8) . . . . ?
C1A Y1 C1C N2 -149.2(11) . . . . ?
Y1 Y1 C1C N2 113.0(8) 2_656 . . . ?
C1C N2 C7B C8B -52.0(17) . . . . ?
C4A N2 C7B C8B 145.8(12) . . . . ?
C1D N2 C7B C8B -74.8(17) . . . . ?
C3A N2 C7B C8B -103.1(11) . . . . ?
C9A N2 C7B C8B -40.7(12) . . . . ?
C2B N2 C7B C8B 174.4(11) . . . . ?
Y1 N2 C7B C8B 41.5(13) . . . . ?
C10B N4 C8B C7B 171.3(12) . . . . ?
C10A N4 C8B C7B -55(3) . . . . ?
C12A N4 C8B C7B -94.2(16) . . . . ?
C8A N4 C8B C7B 153.7(13) . . . . ?
C12B N4 C8B C7B -68.3(15) . . . . ?
Y1 N4 C8B C7B 46.1(14) . . . . ?
N2 C7B C8B N4 -58.5(16) . . . . ?
C1A N1 C9B C10B 127.9(11) . . . . ?
C4B N1 C9B C10B -64.4(13) . . . . ?
C7A N1 C9B C10B -70(2) . . . . ?
C3B N1 C9B C10B 170.1(10) . . . . ?
C1B N1 C9B C10B 149.6(14) . . . . ?
C2A N1 C9B C10B -108.1(11) . . . . ?
Y1 N1 C9B C10B 49.7(11) . . . . ?
C10A N4 C10B C9B -102.2(12) . . . . ?
C12A N4 C10B C9B 147.2(11) . . . . ?
C8B N4 C10B C9B -81.8(13) . . . . ?
C8A N4 C10B C9B -40.9(13) . . . . ?
C12B N4 C10B C9B 163.6(9) . . . . ?
Y1 N4 C10B C9B 40.6(11) . . . . ?
N1 C9B C10B N4 -63.1(13) . . . . ?
C11A N3 C11B C12B -54(9) . . . . ?
C6B N3 C11B C12B 173.7(16) . . . . ?
C5A N3 C11B C12B -113(2) . . . . ?
C6A N3 C11B C12B 137(2) . . . . ?
C5B N3 C11B C12B -74(2) . . . . ?
Y1 N3 C11B C12B 34(2) . . . . ?
N3 C11B C12B N4 -55(2) . . . . ?
C10B N4 C12B C11B -79.2(16) . . . . ?
C10A N4 C12B C11B 154.9(16) . . . . ?
C12A N4 C12B C11B -52.1(13) . . . . ?
C8B N4 C12B C11B 160.1(16) . . . . ?
C8A N4 C12B C11B -95.4(15) . . . . ?
Y1 N4 C12B C11B 46.3(15) . . . . ?
C29 B1 C13 C14 -156.1(2) . . . . ?
C21 B1 C13 C14 83.1(3) . . . . ?
C37 B1 C13 C14 -37.1(3) . . . . ?
C29 B1 C13 C18 28.4(3) . . . . ?
C21 B1 C13 C18 -92.4(3) . . . . ?
C37 B1 C13 C18 147.3(2) . . . . ?
C18 C13 C14 C15 -1.5(4) . . . . ?
B1 C13 C14 C15 -177.3(2) . . . . ?
C13 C14 C15 C16 1.2(4) . . . . ?
C13 C14 C15 C19 -178.9(2) . . . . ?
C14 C15 C16 C17 0.4(4) . . . . ?
C19 C15 C16 C17 -179.5(3) . . . . ?
C15 C16 C17 C18 -1.6(4) . . . . ?
C15 C16 C17 C20 176.4(3) . . . . ?
C16 C17 C18 C13 1.3(4) . . . . ?
C20 C17 C18 C13 -176.7(3) . . . . ?
C14 C13 C18 C17 0.2(4) . . . . ?
B1 C13 C18 C17 176.1(2) . . . . ?
C16 C15 C19 F2 0.0(4) . . . . ?
C14 C15 C19 F2 -179.9(3) . . . . ?
C16 C15 C19 F1 -122.8(3) . . . . ?
C14 C15 C19 F1 57.3(3) . . . . ?
C16 C15 C19 F3 120.8(3) . . . . ?
C14 C15 C19 F3 -59.1(3) . . . . ?
C16 C17 C20 F5B 16(3) . . . . ?
C18 C17 C20 F5B -165(3) . . . . ?
C16 C17 C20 F6A -80.2(7) . . . . ?
C18 C17 C20 F6A 97.9(7) . . . . ?
C16 C17 C20 F4B 138(3) . . . . ?
C18 C17 C20 F4B -44(3) . . . . ?
C16 C17 C20 F4A 156.6(11) . . . . ?
C18 C17 C20 F4A -25.3(11) . . . . ?
C16 C17 C20 F5A 39.0(8) . . . . ?
C18 C17 C20 F5A -142.9(8) . . . . ?
C16 C17 C20 F6B -103(3) . . . . ?
C18 C17 C20 F6B 75(3) . . . . ?
C13 B1 C21 C26 164.9(2) . . . . ?
C29 B1 C21 C26 46.0(3) . . . . ?
C37 B1 C21 C26 -73.1(3) . . . . ?
C13 B1 C21 C22 -17.7(3) . . . . ?
C29 B1 C21 C22 -136.6(2) . . . . ?
C37 B1 C21 C22 104.3(3) . . . . ?
C26 C21 C22 C23 1.5(3) . . . . ?
B1 C21 C22 C23 -176.0(2) . . . . ?
C21 C22 C23 C24 0.3(4) . . . . ?
C21 C22 C23 C27 179.9(2) . . . . ?
C22 C23 C24 C25 -0.6(4) . . . . ?
C27 C23 C24 C25 179.8(2) . . . . ?
C23 C24 C25 C26 -0.9(4) . . . . ?
C23 C24 C25 C28 -179.2(2) . . . . ?
C24 C25 C26 C21 2.9(4) . . . . ?
C28 C25 C26 C21 -178.7(2) . . . . ?
C22 C21 C26 C25 -3.1(3) . . . . ?
B1 C21 C26 C25 174.5(2) . . . . ?
C24 C23 C27 F7 -108.7(3) . . . . ?
C22 C23 C27 F7 71.6(3) . . . . ?
C24 C23 C27 F9 13.9(4) . . . . ?
C22 C23 C27 F9 -165.7(2) . . . . ?
C24 C23 C27 F8 132.8(3) . . . . ?
C22 C23 C27 F8 -46.8(3) . . . . ?
C24 C25 C28 F12 -14.4(4) . . . . ?
C26 C25 C28 F12 167.3(2) . . . . ?
C24 C25 C28 F10 107.8(3) . . . . ?
C26 C25 C28 F10 -70.5(3) . . . . ?
C24 C25 C28 F11 -134.3(3) . . . . ?
C26 C25 C28 F11 47.4(3) . . . . ?
C13 B1 C29 C34 -92.5(3) . . . . ?
C21 B1 C29 C34 26.7(3) . . . . ?
C37 B1 C29 C34 146.3(2) . . . . ?
C13 B1 C29 C30 82.0(3) . . . . ?
C21 B1 C29 C30 -158.8(2) . . . . ?
C37 B1 C29 C30 -39.2(3) . . . . ?
C34 C29 C30 C31 1.2(4) . . . . ?
B1 C29 C30 C31 -173.7(2) . . . . ?
C29 C30 C31 C32 -0.9(4) . . . . ?
C29 C30 C31 C35 -177.3(2) . . . . ?
C30 C31 C32 C33 -0.1(4) . . . . ?
C35 C31 C32 C33 176.3(2) . . . . ?
C31 C32 C33 C34 0.7(4) . . . . ?
C31 C32 C33 C36 179.6(2) . . . . ?
C30 C29 C34 C33 -0.6(4) . . . . ?
B1 C29 C34 C33 174.2(2) . . . . ?
C32 C33 C34 C29 -0.4(4) . . . . ?
C36 C33 C34 C29 -179.2(3) . . . . ?
C32 C31 C35 F13 153.1(2) . . . . ?
C30 C31 C35 F13 -30.4(4) . . . . ?
C32 C31 C35 F15 31.5(4) . . . . ?
C30 C31 C35 F15 -152.1(2) . . . . ?
C32 C31 C35 F14 -88.2(3) . . . . ?
C30 C31 C35 F14 88.2(3) . . . . ?
C32 C33 C36 F17 20.3(4) . . . . ?
C34 C33 C36 F17 -160.9(3) . . . . ?
C32 C33 C36 F16 141.3(3) . . . . ?
C34 C33 C36 F16 -39.8(4) . . . . ?
C32 C33 C36 F18 -100.2(3) . . . . ?
C34 C33 C36 F18 78.6(3) . . . . ?
C13 B1 C37 C38 -25.4(3) . . . . ?
C29 B1 C37 C38 93.5(3) . . . . ?
C21 B1 C37 C38 -145.5(2) . . . . ?
C13 B1 C37 C42 158.4(2) . . . . ?
C29 B1 C37 C42 -82.7(3) . . . . ?
C21 B1 C37 C42 38.3(3) . . . . ?
C42 C37 C38 C39 -1.9(4) . . . . ?
B1 C37 C38 C39 -178.3(2) . . . . ?
C37 C38 C39 C40 2.1(4) . . . . ?
C37 C38 C39 C43 -173.9(2) . . . . ?
C38 C39 C40 C41 -0.3(4) . . . . ?
C43 C39 C40 C41 175.8(2) . . . . ?
C39 C40 C41 C42 -1.6(4) . . . . ?
C39 C40 C41 C44 179.8(3) . . . . ?
C40 C41 C42 C37 1.8(4) . . . . ?
C44 C41 C42 C37 -179.6(3) . . . . ?
C38 C37 C42 C41 -0.1(4) . . . . ?
B1 C37 C42 C41 176.4(2) . . . . ?
C40 C39 C43 F21 156.7(2) . . . . ?
C38 C39 C43 F21 -27.2(4) . . . . ?
C40 C39 C43 F20 35.2(3) . . . . ?
C38 C39 C43 F20 -148.7(2) . . . . ?
C40 C39 C43 F19 -83.5(3) . . . . ?
C38 C39 C43 F19 92.6(3) . . . . ?
C40 C41 C44 F23B 171.6(19) . . . . ?
C42 C41 C44 F23B -7(2) . . . . ?
C40 C41 C44 F22B -39.1(15) . . . . ?
C42 C41 C44 F22B 142.3(15) . . . . ?
C40 C41 C44 F24A 109.9(6) . . . . ?
C42 C41 C44 F24A -68.8(6) . . . . ?
C40 C41 C44 F22A -19.0(5) . . . . ?
C42 C41 C44 F22A 162.4(4) . . . . ?
C40 C41 C44 F23A -134.2(3) . . . . ?
C42 C41 C44 F23A 47.2(4) . . . . ?
C40 C41 C44 F24B 60.1(7) . . . . ?
C42 C41 C44 F24B -118.5(6) . . . . ?
C47 O1 C46 C45 -179.0(3) . . . . ?
C46 O1 C47 C48 179.2(3) . . . . ?
 
_diffrn_measured_fraction_theta_max    0.995
_diffrn_reflns_theta_full              26.51
_diffrn_measured_fraction_theta_full   0.995
_refine_diff_density_max    0.592
_refine_diff_density_min   -0.522
_refine_diff_density_rms    0.055

#==END

 

data_6-Y
 
_audit_creation_method            SHELXL-97
_chemical_name_systematic
;
 ?
;
_chemical_name_common             ?
_chemical_melting_point           ?
_chemical_formula_moiety          
 'C38 H52 N4 O2 Y, C32 H12 B F24'
_chemical_formula_sum
 'C70 H64 B F24 N4 O2 Y'
_chemical_formula_weight          1548.97
 
loop_
 _atom_type_symbol
 _atom_type_description
 _atom_type_scat_dispersion_real
 _atom_type_scat_dispersion_imag
 _atom_type_scat_source
 'C'  'C'   0.0033   0.0016
 'International Tables Vol C Tables 4.2.6.8 and 6.1.1.4'
 'H'  'H'   0.0000   0.0000
 'International Tables Vol C Tables 4.2.6.8 and 6.1.1.4'
 'B'  'B'   0.0013   0.0007
 'International Tables Vol C Tables 4.2.6.8 and 6.1.1.4'
 'F'  'F'   0.0171   0.0103
 'International Tables Vol C Tables 4.2.6.8 and 6.1.1.4'
 'N'  'N'   0.0061   0.0033
 'International Tables Vol C Tables 4.2.6.8 and 6.1.1.4'
 'O'  'O'   0.0106   0.0060
 'International Tables Vol C Tables 4.2.6.8 and 6.1.1.4'
 'Y'  'Y'  -2.7962   3.5667
 'International Tables Vol C Tables 4.2.6.8 and 6.1.1.4'
 
_symmetry_cell_setting            triclinic
_symmetry_space_group_name_H-M    'P-1'
_symmetry_space_group_name_Hall   '-P1'
 
loop_
 _symmetry_equiv_pos_as_xyz
 'x, y, z'
 '-x, -y, -z'
 
_cell_length_a                    10.434(4)
_cell_length_b                    18.744(7)
_cell_length_c                    18.984(7)
_cell_angle_alpha                 93.744(6)
_cell_angle_beta                  104.850(6)
_cell_angle_gamma                 100.939(6)
_cell_volume                      3498(2)
_cell_formula_units_Z             2
_cell_measurement_temperature     100(2)
_cell_measurement_reflns_used     1111
_cell_measurement_theta_min       2.0
_cell_measurement_theta_max       24.8
 
_exptl_crystal_description        plate
_exptl_crystal_colour             colourless
_exptl_crystal_size_max           0.13
_exptl_crystal_size_mid           0.13
_exptl_crystal_size_min           0.05
_exptl_crystal_density_meas       ?
_exptl_crystal_density_diffrn     1.471
_exptl_crystal_density_method     'not measured'
_exptl_crystal_F_000              1576
_exptl_absorpt_coefficient_mu     0.945
_exptl_absorpt_correction_type    multi-scan
_exptl_absorpt_correction_T_min   0.8870
_exptl_absorpt_correction_T_max   0.9543
_exptl_absorpt_process_details    'Mulabs Platon'
 
_exptl_special_details
;
 ?
;
 
_diffrn_ambient_temperature       100(2)
_diffrn_radiation_wavelength      0.71073
_diffrn_radiation_type            MoK\a
_diffrn_radiation_source          'INCOATEC microsource' 
_diffrn_radiation_monochromator   'multilayer optics'
_diffrn_measurement_device_type   'APEX Area Detector' 
_diffrn_measurement_method        'omega scans'
_diffrn_detector_area_resol_mean  ?
_diffrn_standards_number          ?
_diffrn_standards_interval_count  ?
_diffrn_standards_interval_time   ?
_diffrn_standards_decay_%         ?
_diffrn_reflns_number             36467
_diffrn_reflns_av_R_equivalents   0.1762
_diffrn_reflns_av_sigmaI/netI     0.2407
_diffrn_reflns_limit_h_min        -12
_diffrn_reflns_limit_h_max        12
_diffrn_reflns_limit_k_min        -22
_diffrn_reflns_limit_k_max        22
_diffrn_reflns_limit_l_min        -22
_diffrn_reflns_limit_l_max        22
_diffrn_reflns_theta_min          2.07
_diffrn_reflns_theta_max          24.81
_reflns_number_total              11965
_reflns_number_gt                 5012
_reflns_threshold_expression      >2sigma(I)
 
_computing_data_collection        'Bruker SMART (2001)'
_computing_cell_refinement        'Bruker SMART (2001)'
_computing_data_reduction         'Bruker SAINT+ (1999)'
_computing_structure_solution     'SIR-92 (Altomare 1992)'
_computing_structure_refinement   'SHELXL-97 (Sheldrick, 1997)'
_computing_molecular_graphics     'ORTEP-III (Farrugia, 1999)'
 
_refine_special_details
;
 Refinement of F^2^ against ALL reflections.  The weighted R-factor wR and
 goodness of fit S are based on F^2^, conventional R-factors R are based
 on F, with F set to zero for negative F^2^. The threshold expression of
 F^2^ > 2sigma(F^2^) is used only for calculating R-factors(gt) etc. and is
 not relevant to the choice of reflections for refinement.  R-factors based
 on F^2^ are statistically about twice as large as those based on F, and R-
 factors based on ALL data will be even larger.
;
 
_refine_ls_structure_factor_coef  Fsqd
_refine_ls_matrix_type            full
_refine_ls_weighting_scheme       calc
_refine_ls_weighting_details
 'calc w=1/[\s^2^(Fo^2^)+(0.0281P)^2^+0.0000P] where P=(Fo^2^+2Fc^2^)/3'
_atom_sites_solution_primary      direct
_atom_sites_solution_secondary    difmap
_atom_sites_solution_hydrogens    geom
_refine_ls_hydrogen_treatment     constr
_refine_ls_extinction_method      none
_refine_ls_extinction_coef        ?
_refine_ls_number_reflns          11965
_refine_ls_number_parameters      923
_refine_ls_number_restraints      0
_refine_ls_R_factor_all           0.1707
_refine_ls_R_factor_gt            0.0689
_refine_ls_wR_factor_ref          0.1513
_refine_ls_wR_factor_gt           0.1229
_refine_ls_goodness_of_fit_ref    0.852
_refine_ls_restrained_S_all       0.852
_refine_ls_shift/su_max           0.001
_refine_ls_shift/su_mean          0.000
 
loop_
 _atom_site_label
 _atom_site_type_symbol
 _atom_site_fract_x
 _atom_site_fract_y
 _atom_site_fract_z
 _atom_site_U_iso_or_equiv
 _atom_site_adp_type
 _atom_site_occupancy
 _atom_site_symmetry_multiplicity
 _atom_site_calc_flag
 _atom_site_refinement_flags
 _atom_site_disorder_assembly
 _atom_site_disorder_group
Y1 Y 0.37594(7) 0.70256(3) 0.78248(4) 0.0292(2) Uani 1 1 d . B .
O1 O 0.3537(5) 0.7992(2) 0.8284(2) 0.0443(13) Uani 1 1 d . . .
O2 O 0.1790(4) 0.6483(2) 0.7474(2) 0.0339(11) Uani 1 1 d . . .
N1 N 0.3573(5) 0.7273(2) 0.6521(3) 0.0277(13) Uani 1 1 d . B .
N2 N 0.6306(5) 0.7688(3) 0.8433(3) 0.0411(15) Uani 1 1 d . B .
N3 N 0.4110(5) 0.5879(3) 0.8516(3) 0.0421(16) Uani 1 1 d . . .
N4 N 0.5384(5) 0.6382(3) 0.7353(3) 0.0386(15) Uani 1 1 d . . .
F1 F 0.4936(4) -0.03956(18) 0.6102(2) 0.0560(12) Uani 1 1 d . . .
F2 F 0.6785(4) -0.07198(19) 0.6569(2) 0.0627(13) Uani 1 1 d . . .
F3 F 0.5840(4) -0.09772(19) 0.5426(2) 0.0605(13) Uani 1 1 d . . .
F4 F 0.8251(4) 0.0645(2) 0.4012(2) 0.0547(12) Uani 1 1 d . . .
F5 F 1.0131(4) 0.0769(2) 0.4830(2) 0.0572(12) Uani 1 1 d . . .
F6 F 0.9378(4) 0.1705(2) 0.4513(2) 0.0503(11) Uani 1 1 d . . .
F7 F 1.1260(5) 0.4008(3) 0.5342(3) 0.105(2) Uani 1 1 d . . .
F8 F 1.2095(4) 0.4047(3) 0.6462(3) 0.0927(18) Uani 1 1 d . . .
F9 F 1.1476(4) 0.4947(2) 0.6023(3) 0.0755(15) Uani 1 1 d . . .
F10 F 0.6532(4) 0.48524(19) 0.5051(2) 0.0504(11) Uani 1 1 d . . .
F11 F 0.6125(4) 0.4841(2) 0.6090(2) 0.0528(12) Uani 1 1 d . . .
F12 F 0.5125(4) 0.39565(18) 0.5254(2) 0.0458(11) Uani 1 1 d . . .
F13 F 0.2445(5) 0.1072(3) 0.6243(3) 0.106(2) Uani 1 1 d . . .
F14 F 0.1726(4) 0.1961(3) 0.6555(3) 0.106(2) Uani 1 1 d . . .
F15 F 0.2643(5) 0.1983(3) 0.5702(3) 0.120(2) Uani 1 1 d . . .
F16 F 0.4885(5) 0.2687(3) 0.9159(2) 0.0933(18) Uani 1 1 d . . .
F17 F 0.5152(6) 0.3691(3) 0.8725(3) 0.107(2) Uani 1 1 d . . .
F18 F 0.6846(5) 0.3274(3) 0.9203(3) 0.0870(16) Uani 1 1 d . . .
F19 F 1.1912(5) 0.3426(2) 0.9885(2) 0.0815(16) Uani 1 1 d . . .
F20 F 1.2834(5) 0.3878(2) 0.9115(3) 0.0885(17) Uani 1 1 d . . .
F21 F 1.0911(4) 0.4077(2) 0.9143(2) 0.0638(13) Uani 1 1 d . . .
F22A F 1.2752(12) 0.1111(6) 0.8698(6) 0.087(4) Uiso 0.489(10) 1 d P A 1
F23A F 1.1011(11) 0.0699(5) 0.8993(6) 0.064(4) Uiso 0.489(10) 1 d P A 1
F24A F 1.0945(10) 0.0461(4) 0.7870(5) 0.043(3) Uiso 0.489(10) 1 d P A 1
F22B F 1.2070(10) 0.0947(5) 0.9061(6) 0.067(3) Uiso 0.511(10) 1 d P A 2
F23B F 1.0104(11) 0.0400(5) 0.8479(6) 0.081(4) Uiso 0.511(10) 1 d P A 2
F24B F 1.1729(11) 0.0714(5) 0.7918(5) 0.069(3) Uiso 0.511(10) 1 d P A 2
B1 B 0.7903(8) 0.2286(4) 0.6851(4) 0.030(2) Uani 1 1 d . . .
C1 C 0.2269(6) 0.6868(3) 0.6016(3) 0.0376(18) Uani 1 1 d . . .
H1A H 0.2195 0.7011 0.5522 0.056 Uiso 1 1 calc R . .
H1B H 0.1515 0.6985 0.6188 0.056 Uiso 1 1 calc R . .
H1C H 0.2232 0.6341 0.6003 0.056 Uiso 1 1 calc R . .
C2 C 0.3609(6) 0.8063(3) 0.6470(3) 0.0381(18) Uani 1 1 d . . .
H2A H 0.4449 0.8354 0.6806 0.057 Uiso 1 1 calc R . .
H2B H 0.2827 0.8192 0.6603 0.057 Uiso 1 1 calc R . .
H2C H 0.3573 0.8165 0.5966 0.057 Uiso 1 1 calc R . .
C3 C 0.6642(7) 0.8358(3) 0.8089(4) 0.047(2) Uani 1 1 d . . .
H3A H 0.7539 0.8643 0.8367 0.071 Uiso 1 1 calc R . .
H3B H 0.5960 0.8653 0.8089 0.071 Uiso 1 1 calc R . .
H3C H 0.6649 0.8223 0.7583 0.071 Uiso 1 1 calc R . .
C4 C 0.6474(7) 0.7924(4) 0.9221(4) 0.060(2) Uani 1 1 d . . .
H4A H 0.7371 0.8244 0.9433 0.090 Uiso 1 1 calc R . .
H4B H 0.6391 0.7493 0.9485 0.090 Uiso 1 1 calc R . .
H4C H 0.5770 0.8190 0.9263 0.090 Uiso 1 1 calc R . .
C5A C 0.297(3) 0.5752(17) 0.8951(18) 0.058(12) Uiso 0.230(10) 1 d P B -1
H5A H 0.3278 0.5501 0.9380 0.086 Uiso 0.230(10) 1 calc PR B -1
H5B H 0.2125 0.5452 0.8626 0.086 Uiso 0.230(10) 1 calc PR B -1
H5C H 0.2806 0.6226 0.9113 0.086 Uiso 0.230(10) 1 calc PR B -1
C6A C 0.529(4) 0.591(2) 0.922(2) 0.084(15) Uiso 0.230(10) 1 d P B -1
H6A H 0.5226 0.5421 0.9391 0.127 Uiso 0.230(10) 1 calc PR B -1
H6B H 0.5216 0.6259 0.9611 0.127 Uiso 0.230(10) 1 calc PR B -1
H6C H 0.6162 0.6061 0.9116 0.127 Uiso 0.230(10) 1 calc PR B -1
C5B C 0.2811(9) 0.5294(5) 0.8186(5) 0.047(3) Uiso 0.770(10) 1 d P B -2
H5D H 0.2971 0.4815 0.8316 0.070 Uiso 0.770(10) 1 calc PR B -2
H5E H 0.2549 0.5281 0.7650 0.070 Uiso 0.770(10) 1 calc PR B -2
H5F H 0.2080 0.5411 0.8379 0.070 Uiso 0.770(10) 1 calc PR B -2
C6B C 0.4312(11) 0.6007(5) 0.9278(5) 0.053(3) Uiso 0.770(10) 1 d P B -2
H6D H 0.4372 0.5549 0.9493 0.079 Uiso 0.770(10) 1 calc PR B -2
H6E H 0.3548 0.6190 0.9377 0.079 Uiso 0.770(10) 1 calc PR B -2
H6F H 0.5156 0.6371 0.9495 0.079 Uiso 0.770(10) 1 calc PR B -2
C7 C 0.4708(7) 0.7073(4) 0.6286(4) 0.043(2) Uani 1 1 d . . .
H7A H 0.5535 0.7461 0.6494 0.052 Uiso 1 1 calc R B .
H7B H 0.4496 0.7038 0.5745 0.052 Uiso 1 1 calc R . .
C8 C 0.4977(7) 0.6343(4) 0.6536(4) 0.047(2) Uani 1 1 d . B .
H8A H 0.4147 0.5956 0.6332 0.057 Uiso 1 1 calc R . .
H8B H 0.5707 0.6210 0.6343 0.057 Uiso 1 1 calc R . .
C9 C 0.7218(7) 0.7193(4) 0.8373(4) 0.048(2) Uani 1 1 d . . .
H9A H 0.7189 0.6843 0.8740 0.057 Uiso 1 1 calc R B .
H9B H 0.8160 0.7481 0.8484 0.057 Uiso 1 1 calc R . .
C10 C 0.6823(7) 0.6768(4) 0.7606(4) 0.045(2) Uani 1 1 d . B .
H10A H 0.7010 0.7112 0.7253 0.054 Uiso 0.230(10) 1 calc PR B -1
H10B H 0.7401 0.6405 0.7607 0.054 Uiso 0.230(10) 1 calc PR B -1
H10C H 0.7010 0.7112 0.7253 0.054 Uiso 0.770(10) 1 calc PR B -2
H10D H 0.7401 0.6405 0.7607 0.054 Uiso 0.770(10) 1 calc PR B -2
C11A C 0.418(4) 0.539(2) 0.802(2) 0.073(13) Uiso 0.230(10) 1 d P B -1
H11A H 0.3259 0.5223 0.7681 0.088 Uiso 0.230(10) 1 calc PR B -1
H11B H 0.4427 0.4970 0.8266 0.088 Uiso 0.230(10) 1 calc PR B -1
C11B C 0.5210(10) 0.5590(5) 0.8322(5) 0.034(3) Uiso 0.770(10) 1 d P B -2
H11C H 0.6094 0.5875 0.8635 0.041 Uiso 0.770(10) 1 calc PR B -2
H11D H 0.5132 0.5075 0.8427 0.041 Uiso 0.770(10) 1 calc PR B -2
C12 C 0.5184(7) 0.5621(3) 0.7548(4) 0.051(2) Uani 1 1 d . B .
H12A H 0.6082 0.5538 0.7815 0.061 Uiso 1 1 calc R . .
H12B H 0.4867 0.5283 0.7085 0.061 Uiso 1 1 calc R . .
C13 C 0.2952(8) 0.8610(4) 0.8332(4) 0.053(2) Uani 1 1 d . . .
H13 H 0.2248 0.8591 0.7857 0.064 Uiso 1 1 calc R . .
C14 C 0.2210(7) 0.8548(4) 0.8950(4) 0.046(2) Uani 1 1 d . . .
C15 C 0.1278(8) 0.9003(4) 0.8944(4) 0.050(2) Uani 1 1 d . . .
H15 H 0.1148 0.9328 0.8581 0.060 Uiso 1 1 calc R . .
C16 C 0.0554(7) 0.8983(4) 0.9457(4) 0.054(2) Uani 1 1 d . . .
H16 H -0.0058 0.9299 0.9461 0.065 Uiso 1 1 calc R . .
C17 C 0.0739(8) 0.8494(4) 0.9967(4) 0.058(2) Uani 1 1 d . . .
H17 H 0.0231 0.8466 1.0318 0.070 Uiso 1 1 calc R . .
C18 C 0.1644(8) 0.8045(4) 0.9977(4) 0.055(2) Uani 1 1 d . . .
H18 H 0.1769 0.7716 1.0337 0.066 Uiso 1 1 calc R . .
C19 C 0.2368(8) 0.8075(4) 0.9461(4) 0.049(2) Uani 1 1 d . . .
H19 H 0.2984 0.7761 0.9464 0.059 Uiso 1 1 calc R . .
C20 C 0.3973(7) 0.9302(3) 0.8426(5) 0.046(2) Uani 1 1 d . . .
C21 C 0.4960(8) 0.9557(4) 0.9085(4) 0.055(2) Uani 1 1 d . . .
H21 H 0.4966 0.9297 0.9499 0.067 Uiso 1 1 calc R . .
C22 C 0.5919(9) 1.0180(5) 0.9142(5) 0.070(3) Uani 1 1 d . . .
H22 H 0.6610 1.0340 0.9590 0.085 Uiso 1 1 calc R . .
C23 C 0.5898(9) 1.0569(4) 0.8571(5) 0.069(3) Uani 1 1 d . . .
H23 H 0.6582 1.0997 0.8621 0.082 Uiso 1 1 calc R . .
C24 C 0.4913(9) 1.0362(4) 0.7920(5) 0.060(2) Uani 1 1 d . . .
H24 H 0.4894 1.0656 0.7530 0.072 Uiso 1 1 calc R . .
C25 C 0.3934(7) 0.9716(4) 0.7829(4) 0.050(2) Uani 1 1 d . . .
H25 H 0.3257 0.9559 0.7376 0.060 Uiso 1 1 calc R . .
C26 C 0.0379(6) 0.6176(3) 0.7217(3) 0.0294(17) Uani 1 1 d . . .
H26 H 0.0240 0.5765 0.6823 0.035 Uiso 1 1 calc R . .
C27 C -0.0176(6) 0.5873(3) 0.7810(4) 0.0300(17) Uani 1 1 d . . .
C28 C -0.1031(6) 0.5178(3) 0.7680(4) 0.0332(17) Uani 1 1 d . . .
H28 H -0.1271 0.4900 0.7211 0.040 Uiso 1 1 calc R . .
C29 C -0.1527(7) 0.4897(4) 0.8244(4) 0.0422(19) Uani 1 1 d . . .
H29 H -0.2140 0.4435 0.8148 0.051 Uiso 1 1 calc R . .
C30 C -0.1147(7) 0.5275(4) 0.8933(4) 0.046(2) Uani 1 1 d . . .
H30 H -0.1455 0.5070 0.9320 0.056 Uiso 1 1 calc R . .
C31 C -0.0313(8) 0.5956(4) 0.9052(4) 0.055(2) Uani 1 1 d . . .
H31 H -0.0059 0.6230 0.9524 0.066 Uiso 1 1 calc R . .
C32 C 0.0161(7) 0.6246(4) 0.8499(4) 0.0407(19) Uani 1 1 d . . .
H32 H 0.0739 0.6719 0.8597 0.049 Uiso 1 1 calc R . .
C33 C -0.0371(6) 0.6750(3) 0.6877(4) 0.0310(17) Uani 1 1 d . . .
C34 C -0.0068(6) 0.7456(4) 0.7239(4) 0.0390(19) Uani 1 1 d . . .
H34 H 0.0596 0.7580 0.7700 0.047 Uiso 1 1 calc R . .
C35 C -0.0749(7) 0.7992(4) 0.6920(4) 0.045(2) Uani 1 1 d . . .
H35 H -0.0546 0.8473 0.7169 0.054 Uiso 1 1 calc R . .
C36 C -0.1702(7) 0.7814(4) 0.6251(4) 0.047(2) Uani 1 1 d . . .
H36 H -0.2142 0.8176 0.6030 0.057 Uiso 1 1 calc R . .
C37 C -0.2020(7) 0.7108(4) 0.5898(4) 0.047(2) Uani 1 1 d . . .
H37 H -0.2700 0.6980 0.5442 0.056 Uiso 1 1 calc R . .
C38 C -0.1339(7) 0.6581(4) 0.6214(4) 0.0371(18) Uani 1 1 d . . .
H38 H -0.1550 0.6099 0.5965 0.045 Uiso 1 1 calc R . .
C39 C 0.7699(6) 0.1577(3) 0.6256(4) 0.0292(17) Uani 1 1 d . . .
C40 C 0.6981(7) 0.0884(3) 0.6318(3) 0.0361(18) Uani 1 1 d . . .
H40 H 0.6527 0.0838 0.6693 0.043 Uiso 1 1 calc R . .
C41 C 0.6899(7) 0.0267(3) 0.5864(4) 0.0332(18) Uani 1 1 d . . .
C42 C 0.7543(6) 0.0297(3) 0.5310(3) 0.0304(17) Uani 1 1 d . . .
H42 H 0.7485 -0.0131 0.4995 0.036 Uiso 1 1 calc R . .
C43 C 0.8278(6) 0.0972(3) 0.5231(3) 0.0297(17) Uani 1 1 d . . .
C44 C 0.8322(6) 0.1589(3) 0.5688(3) 0.0301(17) Uani 1 1 d . . .
H44 H 0.8805 0.2046 0.5610 0.036 Uiso 1 1 calc R . .
C45 C 0.6109(8) -0.0451(4) 0.5976(5) 0.046(2) Uani 1 1 d . . .
C46 C 0.8987(7) 0.1009(4) 0.4651(4) 0.0339(17) Uani 1 1 d . . .
C47 C 0.8203(6) 0.3038(3) 0.6473(3) 0.0265(16) Uani 1 1 d . . .
C48 C 0.9490(7) 0.3338(3) 0.6401(3) 0.0298(17) Uani 1 1 d . . .
H48 H 1.0215 0.3106 0.6599 0.036 Uiso 1 1 calc R . .
C49 C 0.9767(6) 0.3962(3) 0.6052(3) 0.0254(16) Uani 1 1 d . . .
C50 C 0.8721(6) 0.4305(3) 0.5761(3) 0.0278(16) Uani 1 1 d . . .
H50 H 0.8886 0.4725 0.5515 0.033 Uiso 1 1 calc R . .
C51 C 0.7439(6) 0.4037(3) 0.5828(3) 0.0266(16) Uani 1 1 d . . .
C52 C 0.7197(6) 0.3418(3) 0.6179(3) 0.0280(16) Uani 1 1 d . . .
H52 H 0.6307 0.3244 0.6221 0.034 Uiso 1 1 calc R . .
C53 C 1.1122(7) 0.4232(4) 0.5981(4) 0.0358(18) Uani 1 1 d . . .
C54 C 0.6310(7) 0.4411(4) 0.5559(4) 0.0362(18) Uani 1 1 d . . .
C55 C 0.6540(7) 0.2284(3) 0.7132(4) 0.0298(17) Uani 1 1 d . . .
C56 C 0.5231(7) 0.2024(3) 0.6672(4) 0.0324(17) Uani 1 1 d . . .
H56 H 0.5129 0.1791 0.6195 0.039 Uiso 1 1 calc R . .
C57 C 0.4078(7) 0.2088(3) 0.6876(4) 0.0367(18) Uani 1 1 d . . .
C58 C 0.4190(7) 0.2418(3) 0.7571(4) 0.0380(19) Uani 1 1 d . . .
H58 H 0.3401 0.2458 0.7719 0.046 Uiso 1 1 calc R . .
C59 C 0.5463(8) 0.2689(3) 0.8044(4) 0.0372(18) Uani 1 1 d . . .
C60 C 0.6602(7) 0.2607(3) 0.7829(4) 0.0366(18) Uani 1 1 d . . .
H60 H 0.7467 0.2777 0.8171 0.044 Uiso 1 1 calc R . .
C61 C 0.2748(8) 0.1788(4) 0.6350(5) 0.052(2) Uani 1 1 d . . .
C62 C 0.5584(9) 0.3065(5) 0.8764(5) 0.057(2) Uani 1 1 d . . .
C63 C 0.9205(7) 0.2282(3) 0.7546(4) 0.0312(17) Uani 1 1 d . . .
C64 C 0.9888(7) 0.2909(3) 0.8054(4) 0.0341(18) Uani 1 1 d . . .
H64 H 0.9596 0.3355 0.7981 0.041 Uiso 1 1 calc R . .
C65 C 1.0956(7) 0.2897(4) 0.8649(4) 0.0354(18) Uani 1 1 d . . .
C66 C 1.1428(7) 0.2276(4) 0.8780(4) 0.0402(19) Uani 1 1 d . . .
H66 H 1.2167 0.2273 0.9193 0.048 Uiso 1 1 calc R . .
C67 C 1.0804(8) 0.1651(4) 0.8295(4) 0.040(2) Uani 1 1 d . A .
C68 C 0.9722(7) 0.1651(3) 0.7706(4) 0.0382(19) Uani 1 1 d . . .
H68 H 0.9302 0.1207 0.7393 0.046 Uiso 1 1 calc R . .
C69 C 1.1653(9) 0.3568(4) 0.9183(4) 0.051(2) Uani 1 1 d . . .
C70 C 1.1281(12) 0.0927(5) 0.8428(5) 0.080(3) Uani 1 1 d . . .
 
loop_
 _atom_site_aniso_label
 _atom_site_aniso_U_11
 _atom_site_aniso_U_22
 _atom_site_aniso_U_33
 _atom_site_aniso_U_23
 _atom_site_aniso_U_13
 _atom_site_aniso_U_12
Y1 0.0294(4) 0.0203(4) 0.0383(4) 0.0039(3) 0.0109(3) 0.0038(3)
O1 0.060(3) 0.015(2) 0.061(3) -0.005(2) 0.024(3) 0.007(2)
O2 0.020(3) 0.032(3) 0.046(3) 0.001(2) 0.007(2) 0.001(2)
N1 0.032(3) 0.017(3) 0.032(3) -0.003(3) 0.007(3) 0.002(3)
N2 0.041(4) 0.049(4) 0.029(4) -0.002(3) 0.006(3) 0.007(3)
N3 0.029(4) 0.048(4) 0.049(4) 0.021(3) 0.007(3) 0.009(3)
N4 0.034(4) 0.036(4) 0.041(4) 0.001(3) 0.008(3) 0.000(3)
F1 0.051(3) 0.029(2) 0.095(4) 0.013(2) 0.037(3) 0.002(2)
F2 0.073(3) 0.034(2) 0.078(3) 0.028(2) 0.014(3) 0.007(2)
F3 0.090(3) 0.020(2) 0.071(3) -0.002(2) 0.039(3) -0.011(2)
F4 0.061(3) 0.055(3) 0.042(3) -0.007(2) 0.019(2) -0.005(2)
F5 0.055(3) 0.071(3) 0.065(3) 0.020(2) 0.032(2) 0.032(2)
F6 0.069(3) 0.042(2) 0.052(3) 0.010(2) 0.037(2) 0.010(2)
F7 0.087(4) 0.119(4) 0.096(4) -0.056(4) 0.067(3) -0.047(3)
F8 0.037(3) 0.112(4) 0.136(5) 0.081(4) 0.024(3) 0.010(3)
F9 0.066(3) 0.024(2) 0.149(5) 0.011(3) 0.058(3) -0.001(2)
F10 0.054(3) 0.045(2) 0.055(3) 0.026(2) 0.010(2) 0.017(2)
F11 0.061(3) 0.051(3) 0.046(3) -0.009(2) 0.002(2) 0.033(2)
F12 0.033(2) 0.028(2) 0.065(3) 0.004(2) -0.004(2) 0.0015(19)
F13 0.090(4) 0.054(3) 0.132(5) -0.007(3) -0.027(4) 0.002(3)
F14 0.038(3) 0.148(5) 0.119(5) -0.041(4) 0.015(3) 0.019(3)
F15 0.062(4) 0.197(6) 0.074(4) 0.067(4) -0.011(3) -0.016(4)
F16 0.110(4) 0.109(4) 0.062(3) -0.008(3) 0.057(3) -0.015(3)
F17 0.180(6) 0.088(4) 0.079(4) -0.004(3) 0.046(4) 0.081(4)
F18 0.070(4) 0.131(5) 0.062(4) -0.019(3) 0.026(3) 0.027(3)
F19 0.125(4) 0.058(3) 0.048(3) 0.002(3) 0.001(3) 0.021(3)
F20 0.066(4) 0.060(3) 0.140(5) -0.003(3) 0.046(3) -0.005(3)
F21 0.069(3) 0.047(3) 0.065(3) -0.006(2) -0.008(3) 0.029(2)
B1 0.045(5) 0.013(4) 0.042(5) 0.008(4) 0.024(5) 0.008(4)
C1 0.039(4) 0.026(4) 0.036(5) 0.001(3) -0.003(4) 0.000(3)
C2 0.050(5) 0.025(4) 0.032(4) 0.000(3) 0.005(4) 0.000(4)
C3 0.056(5) 0.033(4) 0.044(5) 0.006(4) 0.005(4) -0.003(4)
C4 0.060(6) 0.064(6) 0.040(5) -0.004(4) 0.003(4) -0.006(5)
C7 0.052(5) 0.049(5) 0.034(5) 0.000(4) 0.019(4) 0.012(4)
C8 0.052(5) 0.046(5) 0.041(5) -0.013(4) 0.007(4) 0.018(4)
C9 0.036(5) 0.057(5) 0.047(5) 0.011(4) 0.004(4) 0.010(4)
C10 0.036(5) 0.054(5) 0.054(5) 0.011(4) 0.018(4) 0.019(4)
C12 0.062(6) 0.031(4) 0.068(6) 0.014(4) 0.022(5) 0.020(4)
C13 0.058(6) 0.042(5) 0.054(6) -0.014(4) 0.016(5) 0.003(4)
C14 0.050(5) 0.027(4) 0.062(6) -0.007(4) 0.023(5) 0.001(4)
C15 0.076(6) 0.031(4) 0.055(6) 0.011(4) 0.027(5) 0.023(4)
C16 0.054(6) 0.044(5) 0.070(6) -0.009(5) 0.030(5) 0.011(4)
C17 0.061(6) 0.048(5) 0.058(6) -0.008(5) 0.026(5) -0.017(5)
C18 0.084(7) 0.025(4) 0.052(6) 0.005(4) 0.019(5) 0.003(5)
C19 0.063(6) 0.035(5) 0.052(6) 0.000(4) 0.020(5) 0.015(4)
C20 0.048(5) 0.012(4) 0.079(6) -0.007(4) 0.036(5) -0.010(4)
C21 0.072(6) 0.047(5) 0.045(6) -0.003(4) 0.023(5) 0.000(5)
C22 0.077(7) 0.062(6) 0.055(6) -0.011(5) 0.015(5) -0.017(5)
C23 0.082(7) 0.042(5) 0.076(7) -0.001(5) 0.033(6) -0.014(5)
C24 0.075(7) 0.038(5) 0.073(7) 0.012(5) 0.031(6) 0.010(5)
C25 0.049(5) 0.050(5) 0.044(5) -0.016(4) 0.011(4) 0.002(4)
C26 0.029(4) 0.029(4) 0.030(4) -0.007(3) 0.008(3) 0.010(3)
C27 0.021(4) 0.033(4) 0.034(4) 0.004(4) 0.001(3) 0.009(3)
C28 0.034(4) 0.027(4) 0.035(5) 0.003(3) 0.005(4) 0.004(3)
C29 0.038(5) 0.032(4) 0.064(6) 0.020(4) 0.018(4) 0.016(4)
C30 0.054(5) 0.061(6) 0.037(5) 0.020(4) 0.020(4) 0.027(5)
C31 0.064(6) 0.061(6) 0.043(5) 0.003(5) 0.023(5) 0.016(5)
C32 0.051(5) 0.034(4) 0.035(5) -0.004(4) 0.017(4) 0.003(4)
C33 0.024(4) 0.028(4) 0.039(5) -0.002(4) 0.010(4) 0.000(3)
C34 0.031(4) 0.039(4) 0.045(5) 0.008(4) 0.010(4) 0.003(4)
C35 0.050(5) 0.040(5) 0.055(6) 0.010(4) 0.028(5) 0.014(4)
C36 0.045(5) 0.051(5) 0.058(6) 0.023(5) 0.025(5) 0.019(4)
C37 0.040(5) 0.062(6) 0.041(5) 0.014(5) 0.010(4) 0.016(4)
C38 0.031(4) 0.037(4) 0.045(5) 0.006(4) 0.015(4) 0.007(4)
C39 0.026(4) 0.021(4) 0.042(5) 0.008(3) 0.005(4) 0.016(3)
C40 0.049(5) 0.034(4) 0.037(5) 0.014(4) 0.025(4) 0.016(4)
C41 0.036(4) 0.016(4) 0.051(5) 0.011(4) 0.015(4) 0.008(3)
C42 0.026(4) 0.023(4) 0.043(5) 0.005(3) 0.007(4) 0.013(3)
C43 0.027(4) 0.027(4) 0.037(4) 0.002(3) 0.010(4) 0.010(3)
C44 0.034(4) 0.020(4) 0.038(4) 0.006(3) 0.011(4) 0.007(3)
C45 0.051(6) 0.026(4) 0.064(6) 0.006(4) 0.020(5) 0.009(4)
C46 0.034(5) 0.026(4) 0.042(5) 0.003(4) 0.010(4) 0.010(4)
C47 0.035(4) 0.021(4) 0.026(4) 0.002(3) 0.008(3) 0.013(3)
C48 0.038(4) 0.016(3) 0.040(4) 0.001(3) 0.017(4) 0.008(3)
C49 0.034(4) 0.021(4) 0.024(4) -0.002(3) 0.014(3) 0.005(3)
C50 0.042(5) 0.009(3) 0.025(4) -0.003(3) 0.006(4) -0.005(3)
C51 0.033(4) 0.016(3) 0.026(4) -0.006(3) 0.002(3) 0.004(3)
C52 0.038(4) 0.016(3) 0.027(4) 0.000(3) 0.010(3) -0.002(3)
C53 0.044(5) 0.026(4) 0.039(5) 0.005(4) 0.013(4) 0.010(4)
C54 0.044(5) 0.034(4) 0.030(5) 0.001(4) 0.009(4) 0.008(4)
C55 0.049(5) 0.015(4) 0.036(5) 0.014(3) 0.023(4) 0.013(3)
C56 0.039(5) 0.016(4) 0.049(5) 0.014(3) 0.021(4) 0.009(3)
C57 0.033(5) 0.031(4) 0.052(5) 0.019(4) 0.014(4) 0.015(4)
C58 0.041(5) 0.036(4) 0.052(5) 0.021(4) 0.026(4) 0.021(4)
C59 0.048(5) 0.029(4) 0.045(5) 0.009(4) 0.026(4) 0.013(4)
C60 0.047(5) 0.018(4) 0.048(5) 0.015(4) 0.017(4) 0.006(3)
C61 0.041(6) 0.044(5) 0.078(7) 0.007(5) 0.028(5) 0.010(4)
C62 0.058(6) 0.084(7) 0.041(6) 0.011(5) 0.018(5) 0.036(6)
C63 0.042(5) 0.026(4) 0.037(5) 0.017(4) 0.025(4) 0.010(4)
C64 0.038(5) 0.025(4) 0.054(5) 0.013(4) 0.031(4) 0.013(4)
C65 0.041(5) 0.037(4) 0.030(5) 0.007(4) 0.011(4) 0.011(4)
C66 0.046(5) 0.052(5) 0.033(5) 0.017(4) 0.016(4) 0.026(4)
C67 0.061(6) 0.040(5) 0.036(5) 0.021(4) 0.021(4) 0.032(4)
C68 0.058(5) 0.027(4) 0.036(5) 0.012(4) 0.020(4) 0.012(4)
C69 0.066(6) 0.045(5) 0.044(6) 0.011(5) 0.018(5) 0.013(5)
C70 0.136(10) 0.099(8) 0.027(6) 0.023(6) 0.034(6) 0.055(8)
 
_geom_special_details
;
 All esds (except the esd in the dihedral angle between two l.s. planes)
 are estimated using the full covariance matrix.  The cell esds are taken
 into account individually in the estimation of esds in distances, angles
 and torsion angles; correlations between esds in cell parameters are only
 used when they are defined by crystal symmetry.  An approximate (isotropic)
 treatment of cell esds is used for estimating esds involving l.s. planes.
;
 
loop_
 _geom_bond_atom_site_label_1
 _geom_bond_atom_site_label_2
 _geom_bond_distance
 _geom_bond_site_symmetry_2
 _geom_bond_publ_flag
Y1 O2 2.029(4) . ?
Y1 O1 2.037(4) . ?
Y1 N1 2.513(5) . ?
Y1 N4 2.558(5) . ?
Y1 N3 2.627(5) . ?
Y1 N2 2.631(5) . ?
O1 C13 1.418(7) . ?
O2 C26 1.418(6) . ?
N1 C7 1.470(7) . ?
N1 C1 1.480(7) . ?
N1 C2 1.484(7) . ?
N2 C9 1.468(8) . ?
N2 C3 1.478(7) . ?
N2 C4 1.487(7) . ?
N3 C11A 1.29(4) . ?
N3 C6B 1.405(10) . ?
N3 C11B 1.474(10) . ?
N3 C5B 1.531(9) . ?
N3 C6A 1.56(4) . ?
N3 C5A 1.61(3) . ?
N4 C10 1.476(7) . ?
N4 C12 1.488(7) . ?
N4 C8 1.492(7) . ?
F1 C45 1.327(7) . ?
F2 C45 1.350(8) . ?
F3 C45 1.322(7) . ?
F4 C46 1.320(7) . ?
F5 C46 1.326(7) . ?
F6 C46 1.356(7) . ?
F7 C53 1.311(7) . ?
F8 C53 1.298(7) . ?
F9 C53 1.311(7) . ?
F10 C54 1.346(7) . ?
F11 C54 1.325(7) . ?
F12 C54 1.327(7) . ?
F13 C61 1.308(8) . ?
F14 C61 1.311(8) . ?
F15 C61 1.292(9) . ?
F16 C62 1.323(8) . ?
F17 C62 1.334(8) . ?
F18 C62 1.334(8) . ?
F19 C69 1.345(8) . ?
F20 C69 1.301(8) . ?
F21 C69 1.332(8) . ?
F22A C70 1.452(14) . ?
F23A C70 1.257(12) . ?
F24A C70 1.257(11) . ?
F22B C70 1.264(12) . ?
F23B C70 1.452(13) . ?
F24B C70 1.253(11) . ?
B1 C39 1.632(9) . ?
B1 C47 1.635(8) . ?
B1 C63 1.636(10) . ?
B1 C55 1.641(9) . ?
C1 H1A 0.9800 . ?
C1 H1B 0.9800 . ?
C1 H1C 0.9800 . ?
C2 H2A 0.9800 . ?
C2 H2B 0.9800 . ?
C2 H2C 0.9800 . ?
C3 H3A 0.9800 . ?
C3 H3B 0.9800 . ?
C3 H3C 0.9800 . ?
C4 H4A 0.9800 . ?
C4 H4B 0.9800 . ?
C4 H4C 0.9800 . ?
C5A H5A 0.9800 . ?
C5A H5B 0.9800 . ?
C5A H5C 0.9800 . ?
C6A H6A 0.9800 . ?
C6A H6B 0.9800 . ?
C6A H6C 0.9800 . ?
C5B H5D 0.9800 . ?
C5B H5E 0.9800 . ?
C5B H5F 0.9800 . ?
C6B H6D 0.9800 . ?
C6B H6E 0.9800 . ?
C6B H6F 0.9800 . ?
C7 C8 1.529(8) . ?
C7 H7A 0.9900 . ?
C7 H7B 0.9900 . ?
C8 H8A 0.9900 . ?
C8 H8B 0.9900 . ?
C9 C10 1.530(8) . ?
C9 H9A 0.9900 . ?
C9 H9B 0.9900 . ?
C10 H10A 0.9900 . ?
C10 H10B 0.9900 . ?
C10 H10C 0.9900 . ?
C10 H10D 0.9900 . ?
C11A C12 1.56(4) . ?
C11A H11A 0.9900 . ?
C11A H11B 0.9900 . ?
C11B C12 1.468(10) . ?
C11B H11C 0.9900 . ?
C11B H11D 0.9900 . ?
C12 H12A 0.9900 . ?
C12 H12B 0.9900 . ?
C13 C20 1.482(8) . ?
C13 C14 1.560(9) . ?
C13 H13 1.0000 . ?
C14 C19 1.358(9) . ?
C14 C15 1.408(9) . ?
C15 C16 1.376(9) . ?
C15 H15 0.9500 . ?
C16 C17 1.378(10) . ?
C16 H16 0.9500 . ?
C17 C18 1.377(10) . ?
C17 H17 0.9500 . ?
C18 C19 1.379(9) . ?
C18 H18 0.9500 . ?
C19 H19 0.9500 . ?
C20 C21 1.389(9) . ?
C20 C25 1.410(9) . ?
C21 C22 1.364(9) . ?
C21 H21 0.9500 . ?
C22 C23 1.343(10) . ?
C22 H22 0.9500 . ?
C23 C24 1.367(10) . ?
C23 H23 0.9500 . ?
C24 C25 1.397(9) . ?
C24 H24 0.9500 . ?
C25 H25 0.9500 . ?
C26 C27 1.489(8) . ?
C26 C33 1.530(8) . ?
C26 H26 1.0000 . ?
C27 C32 1.369(8) . ?
C27 C28 1.399(8) . ?
C28 C29 1.396(8) . ?
C28 H28 0.9500 . ?
C29 C30 1.370(8) . ?
C29 H29 0.9500 . ?
C30 C31 1.369(9) . ?
C30 H30 0.9500 . ?
C31 C32 1.371(9) . ?
C31 H31 0.9500 . ?
C32 H32 0.9500 . ?
C33 C38 1.372(8) . ?
C33 C34 1.390(8) . ?
C34 C35 1.417(8) . ?
C34 H34 0.9500 . ?
C35 C36 1.373(9) . ?
C35 H35 0.9500 . ?
C36 C37 1.384(9) . ?
C36 H36 0.9500 . ?
C37 C38 1.402(8) . ?
C37 H37 0.9500 . ?
C38 H38 0.9500 . ?
C39 C44 1.392(8) . ?
C39 C40 1.401(8) . ?
C40 C41 1.371(8) . ?
C40 H40 0.9500 . ?
C41 C42 1.384(8) . ?
C41 C45 1.498(8) . ?
C42 C43 1.389(8) . ?
C42 H42 0.9500 . ?
C43 C44 1.386(8) . ?
C43 C46 1.474(8) . ?
C44 H44 0.9500 . ?
C47 C52 1.398(8) . ?
C47 C48 1.399(8) . ?
C48 C49 1.401(7) . ?
C48 H48 0.9500 . ?
C49 C50 1.384(8) . ?
C49 C53 1.452(8) . ?
C50 C51 1.378(8) . ?
C50 H50 0.9500 . ?
C51 C52 1.390(7) . ?
C51 C54 1.480(8) . ?
C52 H52 0.9500 . ?
C55 C56 1.395(8) . ?
C55 C60 1.400(8) . ?
C56 C57 1.378(8) . ?
C56 H56 0.9500 . ?
C57 C58 1.387(8) . ?
C57 C61 1.470(10) . ?
C58 C59 1.379(9) . ?
C58 H58 0.9500 . ?
C59 C60 1.382(8) . ?
C59 C62 1.461(9) . ?
C60 H60 0.9500 . ?
C63 C68 1.410(8) . ?
C63 C64 1.414(8) . ?
C64 C65 1.374(8) . ?
C64 H64 0.9500 . ?
C65 C66 1.359(8) . ?
C65 C69 1.498(9) . ?
C66 C67 1.381(9) . ?
C66 H66 0.9500 . ?
C67 C68 1.370(9) . ?
C67 C70 1.546(10) . ?
C68 H68 0.9500 . ?
 
loop_
 _geom_angle_atom_site_label_1
 _geom_angle_atom_site_label_2
 _geom_angle_atom_site_label_3
 _geom_angle
 _geom_angle_site_symmetry_1
 _geom_angle_site_symmetry_3
 _geom_angle_publ_flag
O2 Y1 O1 100.13(17) . . ?
O2 Y1 N1 87.29(16) . . ?
O1 Y1 N1 101.53(17) . . ?
O2 Y1 N4 113.86(17) . . ?
O1 Y1 N4 144.66(17) . . ?
N1 Y1 N4 71.92(17) . . ?
O2 Y1 N3 84.21(16) . . ?
O1 Y1 N3 125.26(19) . . ?
N1 Y1 N3 133.20(17) . . ?
N4 Y1 N3 69.94(18) . . ?
O2 Y1 N2 173.32(17) . . ?
O1 Y1 N2 78.73(18) . . ?
N1 Y1 N2 99.39(17) . . ?
N4 Y1 N2 68.61(17) . . ?
N3 Y1 N2 91.08(18) . . ?
C13 O1 Y1 156.4(4) . . ?
C26 O2 Y1 174.1(4) . . ?
C7 N1 C1 109.7(5) . . ?
C7 N1 C2 109.3(5) . . ?
C1 N1 C2 106.7(5) . . ?
C7 N1 Y1 110.0(4) . . ?
C1 N1 Y1 111.7(4) . . ?
C2 N1 Y1 109.3(3) . . ?
C9 N2 C3 111.2(5) . . ?
C9 N2 C4 109.5(6) . . ?
C3 N2 C4 106.9(5) . . ?
C9 N2 Y1 110.7(4) . . ?
C3 N2 Y1 109.8(4) . . ?
C4 N2 Y1 108.7(4) . . ?
C6B N3 C11B 112.8(7) . . ?
C6B N3 C5B 109.0(6) . . ?
C11B N3 C5B 106.0(6) . . ?
C11A N3 C6A 109(2) . . ?
C11A N3 C5A 123(2) . . ?
C6A N3 C5A 93.0(19) . . ?
C11A N3 Y1 104.4(17) . . ?
C6B N3 Y1 114.0(5) . . ?
C11B N3 Y1 108.8(4) . . ?
C5B N3 Y1 105.6(4) . . ?
C6A N3 Y1 123.1(15) . . ?
C5A N3 Y1 105.8(12) . . ?
C10 N4 C12 112.0(5) . . ?
C10 N4 C8 106.7(5) . . ?
C12 N4 C8 107.9(5) . . ?
C10 N4 Y1 114.6(4) . . ?
C12 N4 Y1 108.2(4) . . ?
C8 N4 Y1 107.3(4) . . ?
C39 B1 C47 109.7(5) . . ?
C39 B1 C63 108.5(5) . . ?
C47 B1 C63 109.0(5) . . ?
C39 B1 C55 111.7(5) . . ?
C47 B1 C55 107.5(5) . . ?
C63 B1 C55 110.3(5) . . ?
N1 C1 H1A 109.5 . . ?
N1 C1 H1B 109.5 . . ?
H1A C1 H1B 109.5 . . ?
N1 C1 H1C 109.5 . . ?
H1A C1 H1C 109.5 . . ?
H1B C1 H1C 109.5 . . ?
N1 C2 H2A 109.5 . . ?
N1 C2 H2B 109.5 . . ?
H2A C2 H2B 109.5 . . ?
N1 C2 H2C 109.5 . . ?
H2A C2 H2C 109.5 . . ?
H2B C2 H2C 109.5 . . ?
N2 C3 H3A 109.5 . . ?
N2 C3 H3B 109.5 . . ?
H3A C3 H3B 109.5 . . ?
N2 C3 H3C 109.5 . . ?
H3A C3 H3C 109.5 . . ?
H3B C3 H3C 109.5 . . ?
N2 C4 H4A 109.5 . . ?
N2 C4 H4B 109.5 . . ?
H4A C4 H4B 109.5 . . ?
N2 C4 H4C 109.5 . . ?
H4A C4 H4C 109.5 . . ?
H4B C4 H4C 109.5 . . ?
N3 C5A H5A 109.5 . . ?
N3 C5A H5B 109.5 . . ?
N3 C5A H5C 109.5 . . ?
N3 C6A H6A 109.5 . . ?
N3 C6A H6B 109.5 . . ?
N3 C6A H6C 109.5 . . ?
N3 C5B H5D 109.5 . . ?
N3 C5B H5E 109.5 . . ?
H5D C5B H5E 109.5 . . ?
N3 C5B H5F 109.5 . . ?
H5D C5B H5F 109.5 . . ?
H5E C5B H5F 109.5 . . ?
N3 C6B H6D 109.5 . . ?
N3 C6B H6E 109.5 . . ?
H6D C6B H6E 109.5 . . ?
N3 C6B H6F 109.5 . . ?
H6D C6B H6F 109.5 . . ?
H6E C6B H6F 109.5 . . ?
N1 C7 C8 111.4(5) . . ?
N1 C7 H7A 109.3 . . ?
C8 C7 H7A 109.3 . . ?
N1 C7 H7B 109.3 . . ?
C8 C7 H7B 109.3 . . ?
H7A C7 H7B 108.0 . . ?
N4 C8 C7 111.4(5) . . ?
N4 C8 H8A 109.3 . . ?
C7 C8 H8A 109.3 . . ?
N4 C8 H8B 109.3 . . ?
C7 C8 H8B 109.3 . . ?
H8A C8 H8B 108.0 . . ?
N2 C9 C10 111.8(6) . . ?
N2 C9 H9A 109.3 . . ?
C10 C9 H9A 109.3 . . ?
N2 C9 H9B 109.3 . . ?
C10 C9 H9B 109.3 . . ?
H9A C9 H9B 107.9 . . ?
N4 C10 C9 113.6(5) . . ?
N4 C10 H10A 108.8 . . ?
C9 C10 H10A 108.8 . . ?
N4 C10 H10B 108.8 . . ?
C9 C10 H10B 108.8 . . ?
H10A C10 H10B 107.7 . . ?
N4 C10 H10C 108.8 . . ?
C9 C10 H10C 108.8 . . ?
H10B C10 H10C 107.7 . . ?
N4 C10 H10D 108.8 . . ?
C9 C10 H10D 108.8 . . ?
H10A C10 H10D 107.7 . . ?
H10C C10 H10D 107.7 . . ?
N3 C11A C12 118(3) . . ?
N3 C11A H11A 107.8 . . ?
C12 C11A H11A 107.8 . . ?
N3 C11A H11B 107.8 . . ?
C12 C11A H11B 107.8 . . ?
H11A C11A H11B 107.1 . . ?
C12 C11B N3 113.0(7) . . ?
C12 C11B H11C 109.0 . . ?
N3 C11B H11C 109.0 . . ?
C12 C11B H11D 109.0 . . ?
N3 C11B H11D 109.0 . . ?
H11C C11B H11D 107.8 . . ?
C11B C12 N4 112.6(6) . . ?
N4 C12 C11A 118.1(15) . . ?
N4 C12 H12A 107.8 . . ?
C11A C12 H12A 107.8 . . ?
C11B C12 H12B 137.8 . . ?
N4 C12 H12B 107.8 . . ?
C11A C12 H12B 107.8 . . ?
H12A C12 H12B 107.1 . . ?
O1 C13 C20 111.3(6) . . ?
O1 C13 C14 108.8(6) . . ?
C20 C13 C14 113.9(6) . . ?
O1 C13 H13 107.5 . . ?
C20 C13 H13 107.5 . . ?
C14 C13 H13 107.5 . . ?
C19 C14 C15 119.0(7) . . ?
C19 C14 C13 124.7(7) . . ?
C15 C14 C13 116.2(7) . . ?
C16 C15 C14 120.9(7) . . ?
C16 C15 H15 119.5 . . ?
C14 C15 H15 119.5 . . ?
C15 C16 C17 118.3(7) . . ?
C15 C16 H16 120.8 . . ?
C17 C16 H16 120.8 . . ?
C18 C17 C16 121.4(8) . . ?
C18 C17 H17 119.3 . . ?
C16 C17 H17 119.3 . . ?
C17 C18 C19 119.5(7) . . ?
C17 C18 H18 120.2 . . ?
C19 C18 H18 120.2 . . ?
C14 C19 C18 120.8(7) . . ?
C14 C19 H19 119.6 . . ?
C18 C19 H19 119.6 . . ?
C21 C20 C25 119.1(6) . . ?
C21 C20 C13 122.0(7) . . ?
C25 C20 C13 118.9(8) . . ?
C22 C21 C20 120.4(7) . . ?
C22 C21 H21 119.8 . . ?
C20 C21 H21 119.8 . . ?
C23 C22 C21 120.6(8) . . ?
C23 C22 H22 119.7 . . ?
C21 C22 H22 119.7 . . ?
C22 C23 C24 121.5(8) . . ?
C22 C23 H23 119.2 . . ?
C24 C23 H23 119.2 . . ?
C23 C24 C25 119.8(8) . . ?
C23 C24 H24 120.1 . . ?
C25 C24 H24 120.1 . . ?
C24 C25 C20 118.5(7) . . ?
C24 C25 H25 120.7 . . ?
C20 C25 H25 120.7 . . ?
O2 C26 C27 111.9(5) . . ?
O2 C26 C33 109.6(5) . . ?
C27 C26 C33 111.2(5) . . ?
O2 C26 H26 108.0 . . ?
C27 C26 H26 108.0 . . ?
C33 C26 H26 108.0 . . ?
C32 C27 C28 118.0(6) . . ?
C32 C27 C26 121.9(6) . . ?
C28 C27 C26 120.1(6) . . ?
C29 C28 C27 119.5(6) . . ?
C29 C28 H28 120.3 . . ?
C27 C28 H28 120.3 . . ?
C30 C29 C28 121.2(7) . . ?
C30 C29 H29 119.4 . . ?
C28 C29 H29 119.4 . . ?
C31 C30 C29 118.7(7) . . ?
C31 C30 H30 120.7 . . ?
C29 C30 H30 120.7 . . ?
C30 C31 C32 120.8(7) . . ?
C30 C31 H31 119.6 . . ?
C32 C31 H31 119.6 . . ?
C27 C32 C31 121.9(7) . . ?
C27 C32 H32 119.1 . . ?
C31 C32 H32 119.1 . . ?
C38 C33 C34 119.1(6) . . ?
C38 C33 C26 120.8(6) . . ?
C34 C33 C26 120.1(6) . . ?
C33 C34 C35 120.1(7) . . ?
C33 C34 H34 119.9 . . ?
C35 C34 H34 119.9 . . ?
C36 C35 C34 119.9(7) . . ?
C36 C35 H35 120.1 . . ?
C34 C35 H35 120.1 . . ?
C35 C36 C37 120.0(7) . . ?
C35 C36 H36 120.0 . . ?
C37 C36 H36 120.0 . . ?
C36 C37 C38 119.9(7) . . ?
C36 C37 H37 120.0 . . ?
C38 C37 H37 120.0 . . ?
C33 C38 C37 121.0(7) . . ?
C33 C38 H38 119.5 . . ?
C37 C38 H38 119.5 . . ?
C44 C39 C40 114.1(6) . . ?
C44 C39 B1 123.5(6) . . ?
C40 C39 B1 122.1(6) . . ?
C41 C40 C39 123.2(6) . . ?
C41 C40 H40 118.4 . . ?
C39 C40 H40 118.4 . . ?
C40 C41 C42 121.2(6) . . ?
C40 C41 C45 119.2(6) . . ?
C42 C41 C45 119.5(6) . . ?
C41 C42 C43 117.7(6) . . ?
C41 C42 H42 121.2 . . ?
C43 C42 H42 121.2 . . ?
C44 C43 C42 119.9(6) . . ?
C44 C43 C46 121.9(6) . . ?
C42 C43 C46 118.2(6) . . ?
C43 C44 C39 123.8(6) . . ?
C43 C44 H44 118.1 . . ?
C39 C44 H44 118.1 . . ?
F3 C45 F1 107.2(6) . . ?
F3 C45 F2 105.1(6) . . ?
F1 C45 F2 105.1(6) . . ?
F3 C45 C41 114.7(6) . . ?
F1 C45 C41 112.5(6) . . ?
F2 C45 C41 111.6(6) . . ?
F4 C46 F5 107.1(5) . . ?
F4 C46 F6 105.4(5) . . ?
F5 C46 F6 104.2(5) . . ?
F4 C46 C43 114.2(6) . . ?
F5 C46 C43 113.0(6) . . ?
F6 C46 C43 112.0(5) . . ?
C52 C47 C48 114.8(6) . . ?
C52 C47 B1 123.1(6) . . ?
C48 C47 B1 122.1(6) . . ?
C47 C48 C49 123.4(6) . . ?
C47 C48 H48 118.3 . . ?
C49 C48 H48 118.3 . . ?
C50 C49 C48 118.9(6) . . ?
C50 C49 C53 120.6(6) . . ?
C48 C49 C53 120.4(6) . . ?
C51 C50 C49 119.8(6) . . ?
C51 C50 H50 120.1 . . ?
C49 C50 H50 120.1 . . ?
C50 C51 C52 119.9(6) . . ?
C50 C51 C54 121.4(6) . . ?
C52 C51 C54 118.6(6) . . ?
C51 C52 C47 123.1(6) . . ?
C51 C52 H52 118.4 . . ?
C47 C52 H52 118.4 . . ?
F8 C53 F7 105.2(6) . . ?
F8 C53 F9 104.8(6) . . ?
F7 C53 F9 103.2(6) . . ?
F8 C53 C49 115.3(6) . . ?
F7 C53 C49 112.7(6) . . ?
F9 C53 C49 114.5(6) . . ?
F11 C54 F12 106.4(6) . . ?
F11 C54 F10 105.2(5) . . ?
F12 C54 F10 106.1(5) . . ?
F11 C54 C51 112.2(6) . . ?
F12 C54 C51 113.7(6) . . ?
F10 C54 C51 112.6(6) . . ?
C56 C55 C60 114.9(6) . . ?
C56 C55 B1 122.5(6) . . ?
C60 C55 B1 122.3(6) . . ?
C57 C56 C55 123.1(7) . . ?
C57 C56 H56 118.4 . . ?
C55 C56 H56 118.4 . . ?
C56 C57 C58 119.9(7) . . ?
C56 C57 C61 118.6(7) . . ?
C58 C57 C61 121.5(7) . . ?
C59 C58 C57 119.1(7) . . ?
C59 C58 H58 120.5 . . ?
C57 C58 H58 120.5 . . ?
C58 C59 C60 119.8(7) . . ?
C58 C59 C62 119.1(7) . . ?
C60 C59 C62 121.1(7) . . ?
C59 C60 C55 123.1(7) . . ?
C59 C60 H60 118.4 . . ?
C55 C60 H60 118.4 . . ?
F15 C61 F13 104.4(7) . . ?
F15 C61 F14 106.1(7) . . ?
F13 C61 F14 104.0(7) . . ?
F15 C61 C57 114.0(7) . . ?
F13 C61 C57 113.4(7) . . ?
F14 C61 C57 113.9(7) . . ?
F16 C62 F18 105.1(7) . . ?
F16 C62 F17 104.5(7) . . ?
F18 C62 F17 102.9(8) . . ?
F16 C62 C59 114.8(8) . . ?
F18 C62 C59 115.3(7) . . ?
F17 C62 C59 112.9(7) . . ?
C68 C63 C64 114.0(6) . . ?
C68 C63 B1 123.2(6) . . ?
C64 C63 B1 122.8(6) . . ?
C65 C64 C63 122.5(6) . . ?
C65 C64 H64 118.8 . . ?
C63 C64 H64 118.8 . . ?
C66 C65 C64 121.5(7) . . ?
C66 C65 C69 117.1(7) . . ?
C64 C65 C69 121.4(6) . . ?
C65 C66 C67 118.2(7) . . ?
C65 C66 H66 120.9 . . ?
C67 C66 H66 120.9 . . ?
C68 C67 C66 121.0(6) . . ?
C68 C67 C70 118.7(7) . . ?
C66 C67 C70 120.2(7) . . ?
C67 C68 C63 122.8(6) . . ?
C67 C68 H68 118.6 . . ?
C63 C68 H68 118.6 . . ?
F20 C69 F21 107.4(6) . . ?
F20 C69 F19 104.0(7) . . ?
F21 C69 F19 105.0(6) . . ?
F20 C69 C65 114.2(7) . . ?
F21 C69 C65 112.8(7) . . ?
F19 C69 C65 112.6(6) . . ?
F24A C70 F23A 115.8(11) . . ?
F24B C70 F22B 113.9(11) . . ?
F24B C70 F23B 111.1(10) . . ?
F22B C70 F23B 100.5(8) . . ?
F24A C70 F22A 108.8(9) . . ?
F23A C70 F22A 98.9(9) . . ?
F24B C70 C67 111.3(8) . . ?
F24A C70 C67 114.8(8) . . ?
F23A C70 C67 109.9(8) . . ?
F22B C70 C67 113.2(9) . . ?
F23B C70 C67 106.1(8) . . ?
F22A C70 C67 107.2(9) . . ?
 
loop_
 _geom_torsion_atom_site_label_1
 _geom_torsion_atom_site_label_2
 _geom_torsion_atom_site_label_3
 _geom_torsion_atom_site_label_4
 _geom_torsion
 _geom_torsion_site_symmetry_1
 _geom_torsion_site_symmetry_2
 _geom_torsion_site_symmetry_3
 _geom_torsion_site_symmetry_4
 _geom_torsion_publ_flag
O2 Y1 O1 C13 -44.0(11) . . . . ?
N1 Y1 O1 C13 45.2(11) . . . . ?
N4 Y1 O1 C13 120.2(10) . . . . ?
N3 Y1 O1 C13 -134.1(10) . . . . ?
N2 Y1 O1 C13 142.7(11) . . . . ?
O2 Y1 N1 C7 -130.0(4) . . . . ?
O1 Y1 N1 C7 130.2(4) . . . . ?
N4 Y1 N1 C7 -13.8(4) . . . . ?
N3 Y1 N1 C7 -50.6(5) . . . . ?
N2 Y1 N1 C7 49.9(4) . . . . ?
O2 Y1 N1 C1 -7.9(4) . . . . ?
O1 Y1 N1 C1 -107.7(4) . . . . ?
N4 Y1 N1 C1 108.3(4) . . . . ?
N3 Y1 N1 C1 71.5(4) . . . . ?
N2 Y1 N1 C1 172.0(4) . . . . ?
O2 Y1 N1 C2 109.9(4) . . . . ?
O1 Y1 N1 C2 10.1(4) . . . . ?
N4 Y1 N1 C2 -133.9(4) . . . . ?
N3 Y1 N1 C2 -170.6(3) . . . . ?
N2 Y1 N1 C2 -70.2(4) . . . . ?
O1 Y1 N2 C9 173.6(4) . . . . ?
N1 Y1 N2 C9 -86.4(4) . . . . ?
N4 Y1 N2 C9 -20.2(4) . . . . ?
N3 Y1 N2 C9 47.8(4) . . . . ?
O1 Y1 N2 C3 -63.3(4) . . . . ?
N1 Y1 N2 C3 36.7(4) . . . . ?
N4 Y1 N2 C3 103.0(4) . . . . ?
N3 Y1 N2 C3 170.9(4) . . . . ?
O1 Y1 N2 C4 53.3(4) . . . . ?
N1 Y1 N2 C4 153.3(4) . . . . ?
N4 Y1 N2 C4 -140.4(5) . . . . ?
N3 Y1 N2 C4 -72.5(4) . . . . ?
O2 Y1 N3 C11A 81(2) . . . . ?
O1 Y1 N3 C11A 179(2) . . . . ?
N1 Y1 N3 C11A 0(2) . . . . ?
N4 Y1 N3 C11A -37(2) . . . . ?
N2 Y1 N3 C11A -104(2) . . . . ?
O2 Y1 N3 C6B -106.1(6) . . . . ?
O1 Y1 N3 C6B -7.8(6) . . . . ?
N1 Y1 N3 C6B 173.1(5) . . . . ?
N4 Y1 N3 C6B 135.8(6) . . . . ?
N2 Y1 N3 C6B 69.1(6) . . . . ?
O2 Y1 N3 C11B 127.0(5) . . . . ?
O1 Y1 N3 C11B -134.7(5) . . . . ?
N1 Y1 N3 C11B 46.2(6) . . . . ?
N4 Y1 N3 C11B 9.0(5) . . . . ?
N2 Y1 N3 C11B -57.7(5) . . . . ?
O2 Y1 N3 C5B 13.6(5) . . . . ?
O1 Y1 N3 C5B 111.9(5) . . . . ?
N1 Y1 N3 C5B -67.2(5) . . . . ?
N4 Y1 N3 C5B -104.5(5) . . . . ?
N2 Y1 N3 C5B -171.2(5) . . . . ?
O2 Y1 N3 C6A -154.5(19) . . . . ?
O1 Y1 N3 C6A -56.2(19) . . . . ?
N1 Y1 N3 C6A 124.7(19) . . . . ?
N4 Y1 N3 C6A 87.5(19) . . . . ?
N2 Y1 N3 C6A 20.8(19) . . . . ?
O2 Y1 N3 C5A -50.1(13) . . . . ?
O1 Y1 N3 C5A 48.3(13) . . . . ?
N1 Y1 N3 C5A -130.8(13) . . . . ?
N4 Y1 N3 C5A -168.1(13) . . . . ?
N2 Y1 N3 C5A 125.2(13) . . . . ?
O2 Y1 N4 C10 -179.7(4) . . . . ?
O1 Y1 N4 C10 17.3(6) . . . . ?
N1 Y1 N4 C10 101.7(4) . . . . ?
N3 Y1 N4 C10 -105.9(5) . . . . ?
N2 Y1 N4 C10 -6.5(4) . . . . ?
O2 Y1 N4 C12 -54.1(5) . . . . ?
O1 Y1 N4 C12 142.9(4) . . . . ?
N1 Y1 N4 C12 -132.6(4) . . . . ?
N3 Y1 N4 C12 19.7(4) . . . . ?
N2 Y1 N4 C12 119.2(5) . . . . ?
O2 Y1 N4 C8 62.1(4) . . . . ?
O1 Y1 N4 C8 -100.9(5) . . . . ?
N1 Y1 N4 C8 -16.5(4) . . . . ?
N3 Y1 N4 C8 135.9(4) . . . . ?
N2 Y1 N4 C8 -124.7(4) . . . . ?
C1 N1 C7 C8 -80.1(6) . . . . ?
C2 N1 C7 C8 163.2(5) . . . . ?
Y1 N1 C7 C8 43.1(6) . . . . ?
C10 N4 C8 C7 -77.9(7) . . . . ?
C12 N4 C8 C7 161.6(6) . . . . ?
Y1 N4 C8 C7 45.3(6) . . . . ?
N1 C7 C8 N4 -62.5(7) . . . . ?
C3 N2 C9 C10 -78.0(7) . . . . ?
C4 N2 C9 C10 164.1(5) . . . . ?
Y1 N2 C9 C10 44.3(6) . . . . ?
C12 N4 C10 C9 -91.4(7) . . . . ?
C8 N4 C10 C9 150.8(6) . . . . ?
Y1 N4 C10 C9 32.2(7) . . . . ?
N2 C9 C10 N4 -52.6(8) . . . . ?
C6B N3 C11A C12 -119(3) . . . . ?
C11B N3 C11A C12 -52(2) . . . . ?
C5B N3 C11A C12 151(4) . . . . ?
C6A N3 C11A C12 -83(3) . . . . ?
C5A N3 C11A C12 171(2) . . . . ?
Y1 N3 C11A C12 51(3) . . . . ?
C11A N3 C11B C12 53(2) . . . . ?
C6B N3 C11B C12 -166.2(7) . . . . ?
C5B N3 C11B C12 74.6(8) . . . . ?
C6A N3 C11B C12 -158.0(17) . . . . ?
C5A N3 C11B C12 136(2) . . . . ?
Y1 N3 C11B C12 -38.6(8) . . . . ?
N3 C11B C12 N4 62.3(9) . . . . ?
N3 C11B C12 C11A -45(2) . . . . ?
C10 N4 C12 C11B 77.8(8) . . . . ?
C8 N4 C12 C11B -165.1(6) . . . . ?
Y1 N4 C12 C11B -49.4(7) . . . . ?
C10 N4 C12 C11A 122.8(19) . . . . ?
C8 N4 C12 C11A -120.1(19) . . . . ?
Y1 N4 C12 C11A -4(2) . . . . ?
N3 C11A C12 C11B 58(3) . . . . ?
N3 C11A C12 N4 -35(4) . . . . ?
Y1 O1 C13 C20 -123.1(10) . . . . ?
Y1 O1 C13 C14 110.5(10) . . . . ?
O1 C13 C14 C19 13.8(10) . . . . ?
C20 C13 C14 C19 -111.1(8) . . . . ?
O1 C13 C14 C15 -163.6(6) . . . . ?
C20 C13 C14 C15 71.5(9) . . . . ?
C19 C14 C15 C16 1.4(11) . . . . ?
C13 C14 C15 C16 179.0(7) . . . . ?
C14 C15 C16 C17 -1.6(11) . . . . ?
C15 C16 C17 C18 1.4(12) . . . . ?
C16 C17 C18 C19 -1.0(11) . . . . ?
C15 C14 C19 C18 -1.0(11) . . . . ?
C13 C14 C19 C18 -178.3(6) . . . . ?
C17 C18 C19 C14 0.8(11) . . . . ?
O1 C13 C20 C21 -73.7(9) . . . . ?
C14 C13 C20 C21 49.8(10) . . . . ?
O1 C13 C20 C25 106.9(8) . . . . ?
C14 C13 C20 C25 -129.6(7) . . . . ?
C25 C20 C21 C22 -3.4(11) . . . . ?
C13 C20 C21 C22 177.2(7) . . . . ?
C20 C21 C22 C23 2.3(13) . . . . ?
C21 C22 C23 C24 0.8(14) . . . . ?
C22 C23 C24 C25 -2.7(13) . . . . ?
C23 C24 C25 C20 1.5(11) . . . . ?
C21 C20 C25 C24 1.5(11) . . . . ?
C13 C20 C25 C24 -179.2(6) . . . . ?
O2 C26 C27 C32 44.2(8) . . . . ?
C33 C26 C27 C32 -78.8(8) . . . . ?
O2 C26 C27 C28 -133.5(6) . . . . ?
C33 C26 C27 C28 103.5(7) . . . . ?
C32 C27 C28 C29 1.2(9) . . . . ?
C26 C27 C28 C29 179.0(6) . . . . ?
C27 C28 C29 C30 -2.8(10) . . . . ?
C28 C29 C30 C31 3.0(10) . . . . ?
C29 C30 C31 C32 -1.6(11) . . . . ?
C28 C27 C32 C31 0.1(10) . . . . ?
C26 C27 C32 C31 -177.6(6) . . . . ?
C30 C31 C32 C27 0.1(11) . . . . ?
O2 C26 C33 C38 133.9(6) . . . . ?
C27 C26 C33 C38 -101.9(7) . . . . ?
O2 C26 C33 C34 -45.6(8) . . . . ?
C27 C26 C33 C34 78.6(7) . . . . ?
C38 C33 C34 C35 -0.4(10) . . . . ?
C26 C33 C34 C35 179.1(6) . . . . ?
C33 C34 C35 C36 -0.5(10) . . . . ?
C34 C35 C36 C37 1.7(10) . . . . ?
C35 C36 C37 C38 -2.0(10) . . . . ?
C34 C33 C38 C37 0.0(10) . . . . ?
C26 C33 C38 C37 -179.5(6) . . . . ?
C36 C37 C38 C33 1.2(10) . . . . ?
C47 B1 C39 C44 29.3(8) . . . . ?
C63 B1 C39 C44 -89.8(7) . . . . ?
C55 B1 C39 C44 148.4(6) . . . . ?
C47 B1 C39 C40 -157.0(6) . . . . ?
C63 B1 C39 C40 84.0(7) . . . . ?
C55 B1 C39 C40 -37.9(8) . . . . ?
C44 C39 C40 C41 0.3(9) . . . . ?
B1 C39 C40 C41 -173.9(6) . . . . ?
C39 C40 C41 C42 0.4(10) . . . . ?
C39 C40 C41 C45 179.8(6) . . . . ?
C40 C41 C42 C43 0.2(10) . . . . ?
C45 C41 C42 C43 -179.3(6) . . . . ?
C41 C42 C43 C44 -1.4(9) . . . . ?
C41 C42 C43 C46 179.0(6) . . . . ?
C42 C43 C44 C39 2.2(10) . . . . ?
C46 C43 C44 C39 -178.2(6) . . . . ?
C40 C39 C44 C43 -1.7(9) . . . . ?
B1 C39 C44 C43 172.5(6) . . . . ?
C40 C41 C45 F3 166.1(6) . . . . ?
C42 C41 C45 F3 -14.5(10) . . . . ?
C40 C41 C45 F1 43.2(10) . . . . ?
C42 C41 C45 F1 -137.4(7) . . . . ?
C40 C41 C45 F2 -74.6(8) . . . . ?
C42 C41 C45 F2 104.8(7) . . . . ?
C44 C43 C46 F4 -134.4(6) . . . . ?
C42 C43 C46 F4 45.2(8) . . . . ?
C44 C43 C46 F5 102.8(7) . . . . ?
C42 C43 C46 F5 -77.6(8) . . . . ?
C44 C43 C46 F6 -14.6(9) . . . . ?
C42 C43 C46 F6 165.0(6) . . . . ?
C39 B1 C47 C52 97.6(7) . . . . ?
C63 B1 C47 C52 -143.6(6) . . . . ?
C55 B1 C47 C52 -24.0(8) . . . . ?
C39 B1 C47 C48 -80.4(7) . . . . ?
C63 B1 C47 C48 38.3(8) . . . . ?
C55 B1 C47 C48 157.9(6) . . . . ?
C52 C47 C48 C49 -1.1(9) . . . . ?
B1 C47 C48 C49 177.1(5) . . . . ?
C47 C48 C49 C50 0.0(9) . . . . ?
C47 C48 C49 C53 -178.5(6) . . . . ?
C48 C49 C50 C51 1.0(8) . . . . ?
C53 C49 C50 C51 179.5(6) . . . . ?
C49 C50 C51 C52 -0.9(9) . . . . ?
C49 C50 C51 C54 176.8(6) . . . . ?
C50 C51 C52 C47 -0.3(9) . . . . ?
C54 C51 C52 C47 -178.0(6) . . . . ?
C48 C47 C52 C51 1.2(9) . . . . ?
B1 C47 C52 C51 -177.0(5) . . . . ?
C50 C49 C53 F8 157.7(6) . . . . ?
C48 C49 C53 F8 -23.8(9) . . . . ?
C50 C49 C53 F7 -81.6(8) . . . . ?
C48 C49 C53 F7 96.9(8) . . . . ?
C50 C49 C53 F9 36.0(9) . . . . ?
C48 C49 C53 F9 -145.5(6) . . . . ?
C50 C51 C54 F11 -97.5(7) . . . . ?
C52 C51 C54 F11 80.2(7) . . . . ?
C50 C51 C54 F12 141.7(6) . . . . ?
C52 C51 C54 F12 -40.6(8) . . . . ?
C50 C51 C54 F10 21.0(8) . . . . ?
C52 C51 C54 F10 -161.3(5) . . . . ?
C39 B1 C55 C56 -35.1(8) . . . . ?
C47 B1 C55 C56 85.3(7) . . . . ?
C63 B1 C55 C56 -155.9(5) . . . . ?
C39 B1 C55 C60 151.2(5) . . . . ?
C47 B1 C55 C60 -88.4(7) . . . . ?
C63 B1 C55 C60 30.3(8) . . . . ?
C60 C55 C56 C57 1.2(9) . . . . ?
B1 C55 C56 C57 -173.0(5) . . . . ?
C55 C56 C57 C58 -0.6(9) . . . . ?
C55 C56 C57 C61 -179.4(6) . . . . ?
C56 C57 C58 C59 1.1(9) . . . . ?
C61 C57 C58 C59 179.8(7) . . . . ?
C57 C58 C59 C60 -2.1(10) . . . . ?
C57 C58 C59 C62 177.4(6) . . . . ?
C58 C59 C60 C55 2.8(10) . . . . ?
C62 C59 C60 C55 -176.7(6) . . . . ?
C56 C55 C60 C59 -2.3(9) . . . . ?
B1 C55 C60 C59 171.9(6) . . . . ?
C56 C57 C61 F15 -49.3(10) . . . . ?
C58 C57 C61 F15 132.0(7) . . . . ?
C56 C57 C61 F13 69.9(9) . . . . ?
C58 C57 C61 F13 -108.8(8) . . . . ?
C56 C57 C61 F14 -171.3(6) . . . . ?
C58 C57 C61 F14 10.0(10) . . . . ?
C58 C59 C62 F16 54.0(10) . . . . ?
C60 C59 C62 F16 -126.5(7) . . . . ?
C58 C59 C62 F18 176.4(7) . . . . ?
C60 C59 C62 F18 -4.1(11) . . . . ?
C58 C59 C62 F17 -65.7(10) . . . . ?
C60 C59 C62 F17 113.8(8) . . . . ?
C39 B1 C63 C68 -20.0(8) . . . . ?
C47 B1 C63 C68 -139.5(6) . . . . ?
C55 B1 C63 C68 102.7(7) . . . . ?
C39 B1 C63 C64 162.0(6) . . . . ?
C47 B1 C63 C64 42.5(8) . . . . ?
C55 B1 C63 C64 -75.3(7) . . . . ?
C68 C63 C64 C65 -0.1(9) . . . . ?
B1 C63 C64 C65 178.0(6) . . . . ?
C63 C64 C65 C66 0.6(10) . . . . ?
C63 C64 C65 C69 -179.5(6) . . . . ?
C64 C65 C66 C67 0.0(10) . . . . ?
C69 C65 C66 C67 -179.9(6) . . . . ?
C65 C66 C67 C68 -1.2(10) . . . . ?
C65 C66 C67 C70 -178.7(7) . . . . ?
C66 C67 C68 C63 1.8(10) . . . . ?
C70 C67 C68 C63 179.3(7) . . . . ?
C64 C63 C68 C67 -1.1(9) . . . . ?
B1 C63 C68 C67 -179.2(6) . . . . ?
C66 C65 C69 F20 75.2(9) . . . . ?
C64 C65 C69 F20 -104.7(8) . . . . ?
C66 C65 C69 F21 -161.8(6) . . . . ?
C64 C65 C69 F21 18.3(10) . . . . ?
C66 C65 C69 F19 -43.2(10) . . . . ?
C64 C65 C69 F19 136.9(7) . . . . ?
C68 C67 C70 F24B 64.9(13) . . . . ?
C66 C67 C70 F24B -117.6(10) . . . . ?
C68 C67 C70 F24A 22.3(13) . . . . ?
C66 C67 C70 F24A -160.2(9) . . . . ?
C68 C67 C70 F23A -110.3(10) . . . . ?
C66 C67 C70 F23A 67.2(13) . . . . ?
C68 C67 C70 F22B -165.3(9) . . . . ?
C66 C67 C70 F22B 12.2(13) . . . . ?
C68 C67 C70 F23B -56.1(9) . . . . ?
C66 C67 C70 F23B 121.4(9) . . . . ?
C68 C67 C70 F22A 143.2(8) . . . . ?
C66 C67 C70 F22A -39.3(10) . . . . ?
 
_diffrn_measured_fraction_theta_max    0.992
_diffrn_reflns_theta_full              24.81
_diffrn_measured_fraction_theta_full   0.992
_refine_diff_density_max    0.844
_refine_diff_density_min   -0.677
_refine_diff_density_rms    0.080

#==END
